# Supplementary material for: An efficient synthesis of methyl 2-cyano-3,12-dioxoursol-1,9-dien-28-oate (CDDU-methyl ester): analogues, biological activities, and comparison with oleanolic acid derivatives
Source: Royal Society of Chemistry journal article supplement (doi:10.1039/c4ob00679h), 2014-01-01

**An Efficient Synthesis of Methyl 2-Cyano-3,12-dioxoursol-1,9-dien-28-oate (CDDU-Methyl Ester), Analogues,  
Biological Activities, and Comparison with Oleanolic Acid Derivatives**

Liangfeng Fu, Qi-Xian Lin, Karen T. Liby,<sup>§</sup> Michael B. Sporn,<sup>\*,§</sup> and Gordon W. Gribble\*

Department of Chemistry, Dartmouth College, Hanover, NH 03755, United States

<sup>§</sup>Department of Pharmacology and Toxicology, Geisel School of Medicine, Hanover, NH 03755, United States

*Organic and Biomolecular Chemistry*

Supporting Information

Index

General Experimental Procedures

Materials

Instrumentation

Biological Evaluation

Synthetic Procedures

Catalog of Nuclear Magnetic Resonance and Infrared Spectra

Bibliography

**General Experimental Procedures.** All reactions were performed in a single-neck, round-bottomed flask fitted with rubber septa under a positive pressure of nitrogen, unless otherwise noted. Organic solutions were concentrated by rotary evaporation below 30 °C. Flash-column chromatography was performed using silica gel (0.04-0.063 mm, 230-400 mesh ASTM) purchased from DAWN RUSSUP Macherey-Nagel INC. (Bethlehem, PA). Analytical thin-layered chromatography (TLC) was performed using glass backed TLC extra hard layer pre-coated with silica gel (0.25 mm, 60Å pore size) impregnated with a fluorescent indicator. TLC plates were visualized by exposure to ultraviolet light (UV) or/and submersion in PAA or CAM stains followed by brief heating on a hot plate (120 °C, 10-15 s). Commercial solvents and reagents were used as received. Iodoxybezoic acid (IBX) was prepared according to the procedure of Frigerio, Santagostino, and Sputore.<sup>1</sup>

**Instrumentation.** Proton nuclear magnetic spectra (<sup>1</sup>H NMR) were recorded at 500 MHz at 24 °C, unless otherwise noted. Chemical shifts are expressed in parts per million (ppm, δ scale) downfield from tetramethylsilane and are referenced to residual protium in the NMR solvent (CHCl<sub>3</sub>, δ 7.26). Data are represented as follows: chemical shift, multiplicity (s = singlet, d = doublet, t = triplet, q = quartet, m = multiplet and/or multiple resonances, br = broad, app = apparent), integration, coupling constant in Hertz, and assignment. Proton-decoupled carbon nuclear magnetic resonance spectra (<sup>13</sup>C NMR) were recorded at 500 MHz at 24 °C unless otherwise noted. Chemical shifts are expressed in parts per million (ppm, δ 77.0). IR spectra were recorded on a Jasco FT-IR 4100 Series spectrophotometer, ν<sub>max</sub> (cm<sup>-1</sup>) are partially reported. High resolution mass spectra were acquired from the Mass Spectrometry Laboratory of the University of Illinois (Urbana-Champaign, IL).

**Biological Evaluation. NO Assay.** RAW264.7 cells (5x10<sup>5</sup> cells per well) were plated in 96-well plates. The next day, cells were incubated with TP and 10 ng/ml IFNγ (R & D Systems) for 24 h. NO was measured as nitrite by the Griess reaction.

### Synthetic Procedure.

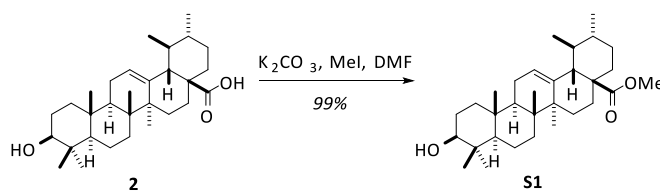

To a stirred solution of oleanolic acid (**2**) (456 mg, 1.0 mmol, 1.0 equiv) in dimethyl formamide (5 mL) was added powdered potassium carbonate (414 mg, 3.0 mmol, 3.0 equiv) followed by slow addition of iodomethane (0.06 mL, 1.0 mmol, 1.0 equiv) at 0 °C. After completion of addition, the reaction mixture was allowed to warm to room temperature and stirred for 24 h. The reaction was quenched by slow addition of water followed by extraction with ethyl acetate (5 x mL). The combined organic extracts were washed with water (4 x mL), brine (1 x mL), and dried over Na<sub>2</sub>SO<sub>4</sub>. Filtration followed by removal of solvent and flash column chromatography over silica gel using hexanes:EtOAc (4:1) gave the desired product **S1** (469 mg, 99%) as a white solid.<sup>2</sup>

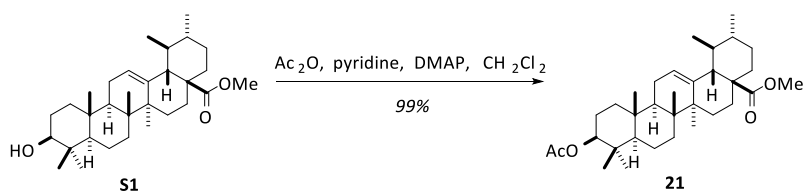

To a stirred solution of ester **S1** (469 mg, 1.0 mmol, 1.0 equiv) in methylene chloride (10 mL) at 0 °C was added pyridine (0.26 mL, 3.0 mmol, 3.0 equiv) and catalytic amount of dimethylaminopyridine, followed by slow addition of acetic anhydride (0.20 mL, 2.0 mmol, 2.0 equiv). The resulting mixture was allowed to stir at room temperature for 24 h. After the completion of reaction, it was diluted with methylene chloride (50 mL), washed with 1 N aqueous HCl (3 x 10 mL), saturated aqueous NaHCO<sub>3</sub> (10 mL), brine (10 mL), and dried over Na<sub>2</sub>SO<sub>4</sub>. Removal of solvent and flash column chromatography over silica gel using hexanes:EtOAc (4:1) gave **21** (510 mg, 99%) as a white solid.<sup>2</sup>

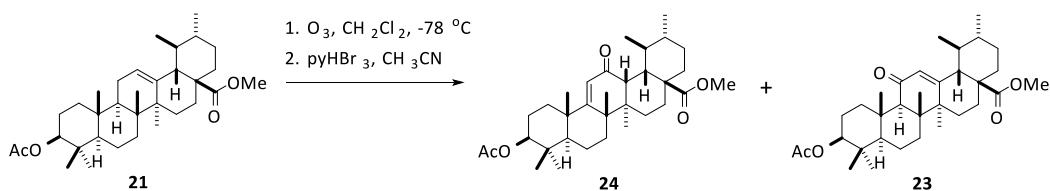

To a stirred solution of ester **21** (500 mg, 0.98 mmol, 1.0 equiv) in methylene chloride (10 mL) was subjected to ozonolysis at -78 °C. Upon completion of the reaction, it was allowed to slowly warm to room temperature and kept at room temperature for 3 h. The solvent was then removed to give crude inseparable reaction mixtures with the desired ketone **22** and **23** (~8:1). The crude mixture was dissolved in acetonitrile (10 mL) and pyridinium perbromide (416 mg, 1.30 mmol, 1.3 equiv) was added. The resulting mixture was then heated to 50 °C for 18 h. After the completion of reaction, it was allowed to cool to room temperature and quenched with 20% aqueous sodium thiosulfate (20 mL). It was then extracted with methylene chloride (3 x 20 mL), the combined organic extracts were washed with saturated aqueous NaHCO<sub>3</sub> (20 mL), brine (20 mL), and dried over Na<sub>2</sub>SO<sub>4</sub>. Removal of solvent and flash column chromatography over silica gel using hexanes:EtOAc (4:1 & 2:1) gave **23** (52 mg, 10%) and **24**<sup>2</sup> (365 mg, 71%) as white solids, respectively.

<sup>1</sup>H NMR (500 MHz, CDCl<sub>3</sub>) δ 5.87 (s, 1H), 4.47 (dd, 1H, *J*<sub>1</sub> = 11.7 Hz, *J*<sub>2</sub> = 4.6 Hz), 3.63 (s, 3H), 2.91 (dd, 1H, *J*<sub>1</sub> = 11.5 Hz, *J*<sub>2</sub> = 3.2 Hz), 2.39 (d, 1H, *J* = 3.7 Hz), 2.04 (s, 3H), 1.87-2.00 (m, 2H), 1.72-1.80 (m, 4H), 1.36-1.70 (m, 10H), 1.14-1.29 (m, 2H), 1.21 (s, 3H), 1.12 (s, 3H), 1.08 (s, 3H), 0.90 (s, 3H), 0.88 (s, 3H), 0.83-0.90 (m, 1H), 0.87 (d, 3H, *J* = 5.6 Hz), 0.73 (d, 3H, *J* = 6.6 Hz); <sup>13</sup>C NMR (500 MHz, CDCl<sub>3</sub>) δ 201.0, 179.3, 178.5, 171.1, 123.3, 80.0, 52.1, 51.2, 50.3, 50.2, 45.4, 42.4, 40.9, 40.1, 39.6, 38.9, 38.3, 37.0, 36.2, 33.0, 31.3, 28.4, 28.3, 24.6, 24.4, 24.1, 24.0, 21.5, 20.9, 19.9, 19.7, 17.7, 16.9; IR (solution, CHCl<sub>3</sub>): 3019, 2366, 2340, 1717, 1652, 1558, 1540, 1520, 1507, 1456, 1217, 772, 669, 463; HRMS-ESI (calcd for C<sub>33</sub>H<sub>50</sub>O<sub>5</sub> [M+H]<sup>+</sup>) 526.3658, found 526.3622.

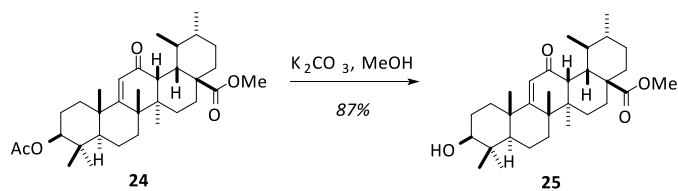

To a stirred solution of enone **24** (7.0 g, 13.3 mmol, 1.0 equiv) in methanol (100 mL) was added potassium carbonate (7.0 g, 40.0 mmol, 3.0 equiv). The reaction mixture was allowed stir at room temperature for 24 h. After completion of the reaction, it was quenched with water (200 mL) and extracted with methylene chloride (4 x 100 mL). The combined organic extracts were washed with brine (80 mL) and dried over Na<sub>2</sub>SO<sub>4</sub>. Removal of solvent and flash column chromatography over silica gel using hexanes:EtOAc (2:1) gave alcohol **25** (5.6 g, 87%) as a white solid.

<sup>1</sup>H NMR (500 MHz, CDCl<sub>3</sub>) δ 5.80 (s, 1H), 3.56 (s, 3H), 3.13 (dd, 1H, *J*<sub>1</sub> = 11.6 Hz, *J*<sub>2</sub> = 4.5 Hz), 2.83 (dd, 1H, *J*<sub>1</sub> = 11.4 Hz, *J*<sub>2</sub> = 3.0 Hz), 2.32 (d, 1H, *J* = 3.8 Hz), 2.25 (brs, 1H), 1.78-1.91 (m, 2H), 1.37-1.72 (m, 12H), 1.24-1.35 (m, 2H), 1.03-1.20 (m, 2H), 1.09 (s, 3H), 1.04 (s, 3H), 1.01 (s, 3H), 0.95 (s, 3H), 0.79 (d, 3H, *J* = 6.1 Hz), 0.73 (s, 3H), 0.65 (d, 3H, *J* = 6.6 Hz); <sup>13</sup>C NMR (500 MHz, CDCl<sub>3</sub>) δ 201.0, 179.9, 178.4, 123.0, 77.9, 52.0, 51.1, 50.1, 45.4, 42.3, 40.8, 40.2, 39.5, 39.4, 38.8, 36.9, 36.4, 33.0, 31.3, 28.4, 27.6, 24.5, 24.4, 23.9, 20.9, 19.9, 19.7, 18.0, 15.9; IR (solution, CHCl<sub>3</sub>): 3019, 2410, 2360, 2340, 1716, 1652, 1558, 1539, 1520, 1507, 1217, 772, 669, 624, 432; HRMS-ESI (calcd for C<sub>31</sub>H<sub>49</sub>O<sub>4</sub> [M+H]<sup>+</sup>) 485.3631, found 485.3633.

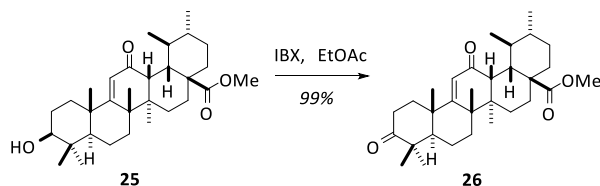

To a stirred solution of alcohol **25** (4.9 g, 10.1 mmol, 1.0 equiv) in ethyl acetate (80 mL) was added iodoxybenzoic acid (3.7 mg, 13.1 mmol, 1.3 equiv) in one portion. The resulting suspension was heated to reflux for 24 h. After completion of the reaction, it was cooled in ice bath and was then filtered through Celite. The resulting filtrate was concentrated and flash column chromatography over silica gel using hexanes:EtOAc (2:1) gave ketone **26** (4.8 g, 99%) as a yellowish solid.

<sup>1</sup>H NMR (500 MHz, CDCl<sub>3</sub>) δ 5.87 (s, 1H), 3.60 (s, 3H), 2.86 (dd, 1H, *J*<sub>1</sub> = 11.2 Hz, *J*<sub>2</sub> = 2.7 Hz), 2.57 (m, 1H), 2.45 (m, 2H), 2.18 (m, 1H), 1.35-1.95 (m, 14H), 1.00-1.30 (m, 2H), 1.24 (s, 3H), 1.12 (s, 3H), 1.08 (s, 3H), 1.07 (s, 3H), 1.03 (s, 3H), 0.83 (d, 3H, *J* = 6.1 Hz), 0.67 (d, 3H, *J* = 6.3 Hz); <sup>13</sup>C NMR (500 MHz, CDCl<sub>3</sub>) δ 215.4, 199.9, 177.9, 177.6, 124.2, 51.8, 50.9, 50.5, 49.9, 47.3, 45.3, 42.2, 40.7, 39.4, 39.3, 38.7, 36.8, 36.7, 34.1, 32.0, 31.1, 28.3, 26.5, 24.3, 24.2, 23.8, 21.4, 20.8, 19.7, 19.5, 19.0; IR (solution, CHCl<sub>3</sub>): 3019, 2360, 2340, 1698, 1684, 1652, 1558, 1540, 1507, 1217, 772, 668; HRMS-ESI (calcd for C<sub>31</sub>H<sub>47</sub>O<sub>4</sub> [M+H]<sup>+</sup>) 483.3474, found 483.3471.

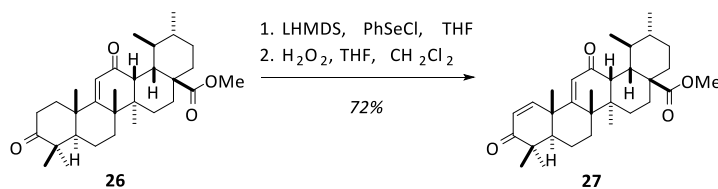

To a stirred solution of ketone **26** (4.8 g, 10.0 mmol, 1.0 equiv) in anhydrous THF (150 mL) at  $-78\text{ }^{\circ}\text{C}$  was slowly added LHMDS (20 mL, 1.0 M solution, 20.0 mmol, 2.0 equiv), it was kept stirring at  $-78\text{ }^{\circ}\text{C}$  for 30 min and then allowed to warm to  $0\text{ }^{\circ}\text{C}$  and kept at  $0\text{ }^{\circ}\text{C}$  for 30 min. It was then cooled back to  $-78\text{ }^{\circ}\text{C}$  and phenylselenium chloride (3.8 g, 20.0 mmol, 2.0 equiv) in anhydrous THF (10 mL) was added slowly. After the completion of the reaction, it was quenched with saturated aqueous ammonium chloride, and extracted with methylene chloride (3 x 100 mL). The combined organic extracts were washed with brine and dried over  $\text{Na}_2\text{SO}_4$ . The solvent was removed to give crude product, which was used directly for next step without further purifications.

The selenite obtained above was dissolved in a 1:1 mixture of THF and methylene chloride (100 mL), and 30% aqueous hydrogen peroxide (5 mL) was added at  $0\text{ }^{\circ}\text{C}$ . The reaction mixture was allowed to warm to room temperature and stirred until disappearance of starting selenite. The reaction mixture was then diluted with ethyl acetate (100 mL) and washed with 20% aqueous sodium thiosulfate (10 mL), brine (10 mL), and dried over  $\text{Na}_2\text{SO}_4$ . Removal of solvent and flash column chromatography over silica gel using hexanes:EtOAc (4:1 & 2:1) gave bis-enone **27** (3.44 g, 72%) as a yellowish solid.

$^1\text{H}$  NMR (500 MHz,  $\text{CDCl}_3$ )  $\delta$  7.32 (d, 1H,  $J = 10.7$  Hz), 6.14 (s, 1H), 5.93 (d, 1H,  $J = 10.3$  Hz), 3.66 (s, 3H), 2.95 (dd, 1H,  $J_1 = 11.2$  Hz,  $J_2 = 3.2$  Hz), 2.48 (d, 1H,  $J = 3.7$  Hz), 1.89-1.98 (m, 1H), 1.70-1.84 (m, 7H), 1.44-1.65 (m, 4H), 1.40 (s, 3H), 1.10-1.29 (m, 3H), 1.20 (s, 3H), 1.18 (s, 3H), 1.12 (s, 3H), 1.11 (s, 3H), 0.88 (d, 3H,  $J = 6.1$  Hz), 0.73 (d, 3H,  $J = 6.3$  Hz);  $^{13}\text{C}$  NMR (500 MHz,  $\text{CDCl}_3$ )  $\delta$  203.8, 200.0, 178.4, 173.0, 155.4, 126.5, 124.4, 52.1, 51.4, 50.2, 48.4, 45.8, 44.9, 42.5, 42.1, 41.1, 39.6, 38.9, 36.9, 32.2, 31.3, 28.5, 28.0, 27.5, 25.3, 24.0, 21.8, 20.9, 20.0, 19.6, 18.5; IR (solution,  $\text{CHCl}_3$ ): 3019, 2360, 2340, 1716, 1699, 1652, 1558, 1540, 1520, 1507, 1216, 770, 668, 451; HRMS-ESI (calcd for  $\text{C}_{31}\text{H}_{45}\text{O}_4$   $[\text{M}+\text{H}]^+$ ) 481.3318, found 481.3306.

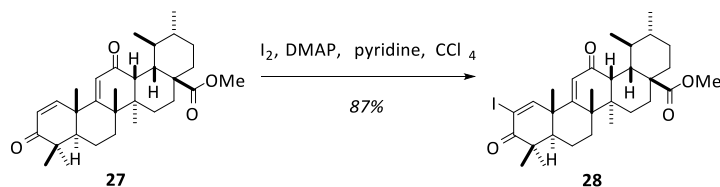

To a stirred solution of bis-enone **27** (1.07 g, 2.3 mmol, 1.0 equiv) in a 1:1 mixture of pyridine and carbon tetrachloride (10 mL) was added dimethylaminopyridine (56 mg, 0.46 mmol, 0.2 equiv) and iodine (1.75 g, 6.9 mmol, 3.0 equiv), and the resulting mixture was allowed to heat to  $90\text{ }^{\circ}\text{C}$  for 24 h without light. After the completion of the reaction, the solvent was removed under vacuum, and the residue was diluted with ethyl acetate (100 mL). The resulting solution was successively washed with 20% aqueous sodium thiosulfate (3 x 10 mL), 1 N aqueous HCl (3 x 10 mL), saturated  $\text{NaHCO}_3$  (10 mL), brine (10 mL), and dried over  $\text{Na}_2\text{SO}_4$ . Removal of solvent and flash column chromatography over silica gel using hexanes:EtOAc (4:1 & 2:1) gave iodoenone **28** (1.18 g, 87%) as a yellowish solid.

$^1\text{H}$  NMR (500 MHz,  $\text{CDCl}_3$ )  $\delta$  8.11 (s, 1H), 6.11 (s, 1H), 3.66 (s, 3H), 2.95 (dd, 1H,  $J_1 = 11.3$  Hz,  $J_2 = 3.0$  Hz), 2.48 (d, 1H,  $J = 3.7$  Hz), 1.90-1.99 (m, 1H), 1.70-1.87 (m, 7H), 1.59-1.65 (m, 1H), 1.44-1.57 (m, 3H), 1.41 (s, 3H), 1.15-1.26 (m, 3H), 1.18 (s, 3H), 1.22 (s, 3H), 1.17 (s, 3H), 1.13 (s, 3H), 0.89 (d, 3H,  $J = 6.1$  Hz), 0.75 (d, 3H,  $J = 6.6$  Hz);  $^{13}\text{C}$  NMR (500 MHz,  $\text{CDCl}_3$ )  $\delta$  199.8, 197.0, 178.3, 171.5, 163.8, 124.6, 102.4, 52.2, 51.3, 50.2, 38.3, 36.5, 45.9, 45.4, 42.5, 41.2, 39.6, 38.9, 36.9, 31.9, 31.3, 28.6, 28.5, 28.0, 25.3, 24.0, 22.4, 20.9, 20.0, 19.7, 18.7; IR (solution,  $\text{CHCl}_3$ ): 3019, 2360, 2340, 1717, 1652, 1540, 1520, 1507, 1217, 770, 669; HRMS-ESI (calcd for  $\text{C}_{31}\text{H}_{44}\text{IO}_4$   $[\text{M}+\text{H}]^+$ ) 607.2284, found 607.2280.

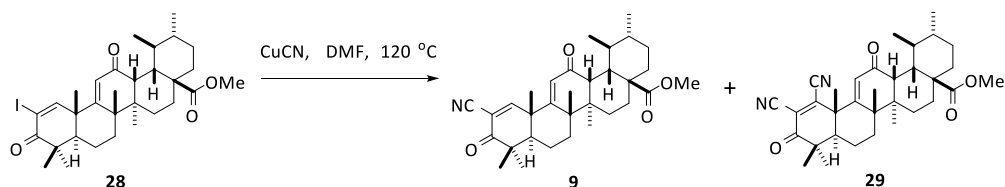

To a stirred solution of iodoenone **28** (322 mg, 0.5 mmol, 1.0 equiv) in anhydrous dimethylformamide (5 mL) was added copper (I) cyanide (54 mg, 0.6 mmol, 1.2 equiv), and the resulting mixture was allowed to heat to 120 °C for 12 hours. After the completion of the reaction, it was cooled to room temperature, diluted with ethyl acetate (100 mL). The resulting solution was washed with water (3 x 10 mL), brine (3 x 10 mL), and dried over Na<sub>2</sub>SO<sub>4</sub>. Removal of solvent and flash column chromatography over silica gel using hexanes:EtOAc (4:1 & 2:1) gave cyanoenone **9** (142 mg, 53%) and bis-cyanoenone **29** (76 mg, 27%) as yellowish solids, respectively.

For **9**: <sup>1</sup>H NMR (500 MHz, CDCl<sub>3</sub>) δ 8.04 (s, 1H), 6.11 (s, 1H), 3.67 (s, 3H), 2.96 (dd, 1H, *J*<sub>1</sub> = 11.5 Hz, *J*<sub>2</sub> = 2.7 Hz), 2.51 (d, 1H, *J* = 3.7 Hz), 1.91-1.99 (m, 1H), 1.72-1.85 (m, 7H), 1.60-1.68 (m, 1H), 1.47-1.58 (m, 3H), 1.48 (s, 3H), 1.16-1.30 (m, 2H), 1.26 (s, 3H), 1.21 (s, 3H), 1.18 (s, 3H), 1.12 (s, 3H), 0.90 (d, 3H, *J* = 6.1 Hz), 0.83-0.90 (m, 1H), 0.74 (d, 3H, *J* = 6.6 Hz); <sup>13</sup>C NMR (500 MHz, CDCl<sub>3</sub>) δ 199.3, 196.9, 178.3, 169.8, 166.4, 124.9, 115.1, 114.7, 52.2, 51.4, 50.2, 47.9, 46.0, 45.3, 42.9, 42.6, 41.2, 39.6, 38.9, 36.9, 31.9, 31.3, 28.5, 27.6, 27.5, 25.4, 23.9, 21.8, 20.9, 20.0, 19.6, 18.4; IR (solution, CHCl<sub>3</sub>): 3019, 2360, 2340, 1716, 1652, 1558, 1540, 1520, 1507, 1217, 772, 669, 464; HRMS-ESI (calcd for C<sub>32</sub>H<sub>44</sub>NO<sub>4</sub> [M+H]<sup>+</sup>) 506.3270, found 506.3267.

For **29**: <sup>1</sup>H NMR (500 MHz, CDCl<sub>3</sub>) δ 6.22 (s, 1H), 3.68 (s, 3H), 3.02 (dd, 1H, *J*<sub>1</sub> = 11.6 Hz, *J*<sub>2</sub> = 2.0 Hz), 2.51 (d, 1H, *J* = 3.4 Hz), 1.74-2.02 (m, 7H), 1.40-1.67 (m, 4H), 1.62 (s, 3H), 1.18-1.34 (m, 2H), 1.26 (s, 3H), 1.22 (s, 3H), 1.21 (s, 3H), 1.17 (s, 3H), 0.83-0.97 (m, 1H), 0.90 (d, 3H, *J* = 5.9 Hz), 0.74 (d, 3H, *J* = 6.6 Hz); <sup>13</sup>C NMR (500 MHz, CDCl<sub>3</sub>) δ 198.0, 195.2, 178.3, 166.3, 146.8, 126.9, 124.6, 113.9, 112.1, 52.3, 51.6, 50.3, 47.3, 46.4, 46.2, 46.1, 42.7, 42.1, 39.8, 38.8, 36.8, 31.4, 29.1, 28.8, 26.6, 26.2, 26.1, 24.1, 21.0, 20.9, 20.0, 19.3, 19.2; IR (solution, CHCl<sub>3</sub>): 3019, 2929, 2360, 2340, 1732, 1716, 1683, 1668, 1653, 1558, 1540, 1520, 1507, 1472, 1456, 1217, 772, 669, 473; HRMS-ESI (calcd for C<sub>33</sub>H<sub>43</sub>N<sub>2</sub>O<sub>4</sub> [M+H]<sup>+</sup>) 531.3474, found 531.3468.

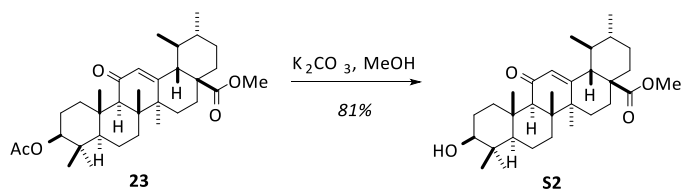

To a stirred solution of enone **23** (2.0 g, 3.8 mmol, 1.0 equiv) in methanol (40 mL) was added potassium carbonate (2.0 g, 11.4 mmol, 3.0 equiv). The reaction mixture was allowed to stir at room temperature for 24 h. After completion of the reaction, it was quenched with water (100 mL) and extracted with methylene chloride (4 x 60 mL). The combined organic extracts were washed with brine (30 mL) and dried over Na<sub>2</sub>SO<sub>4</sub>. Removal of solvent and flash column chromatography over silica gel using hexanes:EtOAc (2:1) gave alcohol **S2** (1.5 g, 81%) as a white solid.

<sup>1</sup>H NMR (500 MHz, CDCl<sub>3</sub>) δ 5.54 (s, 1H), 3.55 (s, 3H), 3.15 (dd, 1H, *J*<sub>1</sub> = 11.2 Hz, *J*<sub>2</sub> = 4.9 Hz), 2.73 (dd, 1H, *J*<sub>1</sub> = 10.1 Hz, *J*<sub>2</sub> = 3.3 Hz), 2.36 (d, 1H, *J* = 11.2 Hz), 2.25 (s, 1H), 2.01 (m, 2H), 1.66-1.78 (m, 3H), 1.46-1.64 (m, 6H), 1.17-1.38 (m, 7H), 1.25

(s, 3H), 1.06 (s, 3H), 0.94 (s, 3H), 0.91 (d, 3H,  $J = 6.4$  Hz), 0.85 (s, 3H), 0.81 (d, 3H,  $J = 6.6$  Hz), 0.74 (s, 3H);  $^{13}\text{C}$  NMR (500 MHz,  $\text{CDCl}_3$ )  $\delta$  200.1, 117.4, 163.0, 130.9, 78.8, 61.6, 55.2, 52.9, 52.0, 47.8, 44.8, 43.9, 39.4, 39.3, 38.8, 38.7, 37.3, 36.2, 33.2, 30.5, 28.6, 28.3, 27.4, 24.1, 21.3, 21.2, 19.0, 17.6, 17.3, 16.4, 15.9; IR (solution,  $\text{CHCl}_3$ ): 3019, 2360, 2340, 1698, 1652, 1558, 1540, 1520, 1507, 1217, 771, 669, 436; HRMS-ESI (calcd for  $\text{C}_{31}\text{H}_{49}\text{O}_4$   $[\text{M}+\text{H}]^+$ ) 485.3631, found 485.3633.

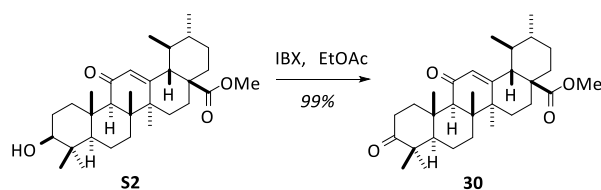

To a stirred solution of alcohol **52** (1.4 g, 2.9 mmol, 1.0 equiv) in ethyl acetate (30 mL) was added iodoxybenzoic acid (1.2 mg, 3.9 mmol, 1.3 equiv) in one portion. The resulting suspension was heated to reflux for 24 h. After completion of the reaction, it was cooled in ice bath and was then filtered through Celite. The resulting filtrate was concentrated and flash column chromatography over silica gel using hexanes:EtOAc (2:1) gave ketone **30** (1.38 g, 99%) as a yellowish solid.

$^1\text{H}$  NMR (500 MHz,  $\text{CDCl}_3$ )  $\delta$  5.57 (s, 1H), 3.55 (s, 3H), 2.88 (m, 1H), 2.55 (m, 1H), 2.25-2.40 (m, 3H), 2.03 (m, 1H), 1.67-1.80 (m, 3H), 1.30-1.64 (m, 9H), 1.16-1.30 (m, 3H), 1.24 (s, 3H), 1.14 (s, 3H), 1.02 (s, 3H), 0.98 (s, 3H), 0.90 (d, 3H,  $J = 6.3$  Hz), 0.88 (s, 3H), 0.80 (d, 3H,  $J = 6.3$  Hz);  $^{13}\text{C}$  NMR (500 MHz,  $\text{CDCl}_3$ )  $\delta$  217.3, 199.2, 177.3, 163.5, 130.7, 60.9, 55.5, 52.9, 52.0, 47.9, 47.8, 44.6, 44.0, 39.9, 38.8, 38.7, 36.9, 36.1, 34.4, 32.5, 30.5, 28.6, 26.7, 24.0, 21.6, 21.2, 21.1, 18.9, 18.8, 17.3, 15.7; IR (solution,  $\text{CHCl}_3$ ): 3019, 2360, 2340, 1717, 1653, 1539, 1507, 1456, 1214, 669; HRMS-ESI (calcd for  $\text{C}_{31}\text{H}_{47}\text{O}_4$   $[\text{M}+\text{H}]^+$ ) 483.3474, found 483.3476.

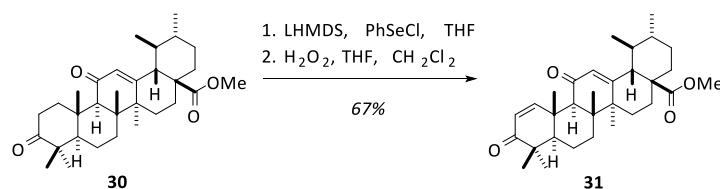

To a stirred solution of ketone **30** (1.3 g, 2.7 mmol, 1.0 equiv) in anhydrous THF (50 mL) at  $-78$  °C was slowly added LHMDS (5.4 mL, 1.0 M solution, 5.4 mmol, 2.0 equiv), it was kept stirring at  $-78$  °C for 30 min and then allowed to warm to  $0$  °C and kept at  $0$  °C for 30 min. It was then cooled back to  $-78$  °C and phenylselenium chloride (1.1 g, 5.4 mmol, 2.0 equiv) in anhydrous THF (5 mL) was added slowly. After the completion of the reaction, it was quenched with saturated aqueous ammonium chloride, and extracted with methylene chloride (3 x 50 mL). The combined organic extracts were washed with brine (20 mL) and dried over  $\text{Na}_2\text{SO}_4$ . The solvent was removed to give crude product, which was used directly for next step without further purifications.

The selenite obtained above was dissolved in a 1:1 mixture of THF and methylene chloride (20 mL), and 30% aqueous hydrogen peroxide (2 mL) was added at  $0$  °C. The reaction mixture was allowed to warm to room temperature and stirred until disappearance of starting selenite. The reaction mixture was then diluted with ethyl acetate (100 mL) and washed with 20% aqueous sodium thiosulfate (10 mL), brine (10 mL), and dried over  $\text{Na}_2\text{SO}_4$ . Removal of solvent and flash column chromatography over silica gel using hexanes:EtOAc (4:1 & 2:1) gave bis-enone **31** (0.88 g, 67%) as a yellowish solid.



$^1\text{H}$  NMR (500 MHz,  $\text{CDCl}_3$ )  $\delta$  7.71 (d, 1H,  $J = 10.3$  Hz), 5.77 (d, 1H,  $J = 10.3$  Hz), 5.67 (s, 1H), 3.60 (s, 3H), 2.61 (s, 1H), 2.44 (d, 1H,  $J = 11.2$  Hz), 2.06 (m, 1H), 1.72-1.84 (m, 3H), 1.46-1.68 (m, 7H), 1.25-1.44 (m, 4H), 1.37 (s, 3H), 1.30 (s, 3H), 1.12 (s, 3H), 1.08 (s, 3H), 0.95 (d, 3H,  $J = 6.4$  Hz), 0.94 (s, 3H), 0.85 (d, 3H,  $J = 6.3$  Hz);  $^{13}\text{C}$  NMR (500 MHz,  $\text{CDCl}_3$ )  $\delta$  204.8, 198.8, 177.3, 164.5, 161.9, 130.5, 124.8, 55.5, 53.1, 53.0, 52.1, 47.9, 45.0, 44.9, 44.3, 39.1, 38.8, 38.7, 36.1, 32.6, 30.5, 28.7, 27.9, 24.1, 21.8, 21.3, 21.2, 20.2, 19.4, 18.3, 17.3; IR (solution,  $\text{CHCl}_3$ ): 3019, 2360, 2340, 1716, 1699, 1652, 1558, 1540, 1520, 1507, 1216, 770, 668; HRMS-ESI (calcd for  $\text{C}_{31}\text{H}_{45}\text{O}_4$   $[\text{M}+\text{H}]^+$ ) 481.3318, found 481.3316.

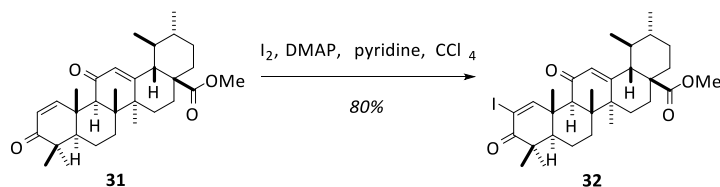

To a stirred solution of bisenone **31** (0.47 g, 1.0 mmol, 1.0 equiv) in a 1:1 mixture of pyridine and carbon tetrachloride (6 mL) was added dimethylaminopyridine (25 mg, 0.2 mmol, 0.2 equiv) and iodine (0.76 g, 3.0 mmol, 3.0 equiv), and the resulting mixture was allowed to heat to  $90^\circ\text{C}$  for 24 h without light. After the completion of the reaction, the solvent was removed under vacuum, and the residue was diluted with ethyl acetate (50 mL). The resulting solution was successively washed with 20% aqueous sodium thiosulfate (3 x 5 mL), 1 N aqueous HCl (3 x 5 mL), saturated  $\text{NaHCO}_3$  (5 mL), brine (5 mL), and dried over  $\text{Na}_2\text{SO}_4$ . Removal of solvent and flash column chromatography over silica gel using hexanes:EtOAc (4:1 & 2:1) to give iodoenone **32** (0.47 g, 80%) as a yellowish solid.

$^1\text{H}$  NMR (500 MHz,  $\text{CDCl}_3$ )  $\delta$  8.53 (s, 1H), 5.70 (s, 1H), 3.62 (s, 3H), 2.67 (s, 1H), 2.46 (d, 1H,  $J = 11.2$  Hz), 2.10 (m, 1H), 1.74-1.86 (m, 3H), 1.48-1.70 (m, 7H), 1.22-1.46 (m, 4H), 1.40 (s, 3H), 1.33 (s, 3H), 1.18 (s, 3H), 1.15 (s, 3H), 0.98 (d, 3H,  $J = 6.3$  Hz), 0.94 (s, 3H), 0.88 (d, 3H,  $J = 6.6$  Hz);  $^{13}\text{C}$  NMR (500 MHz,  $\text{CDCl}_3$ )  $\delta$  198.3, 197.6, 177.3, 169.9, 164.9, 130.3, 101.0, 55.1, 53.1, 52.8, 52.2, 47.9, 45.7, 45.0, 44.4, 43.8, 38.9, 38.8, 36.1, 32.4, 30.5, 29.0, 28.7, 24.1, 22.4, 21.3, 21.2, 20.0, 19.4, 18.5, 17.3; IR (solution,  $\text{CHCl}_3$ ): 3019, 2360, 2340, 1717, 1652, 1540, 1520, 1507, 1217, 770, 669; HRMS-ESI (calcd for  $\text{C}_{31}\text{H}_{44}\text{IO}_4$   $[\text{M}+\text{H}]^+$ ) 607.2284, found 607.2231.

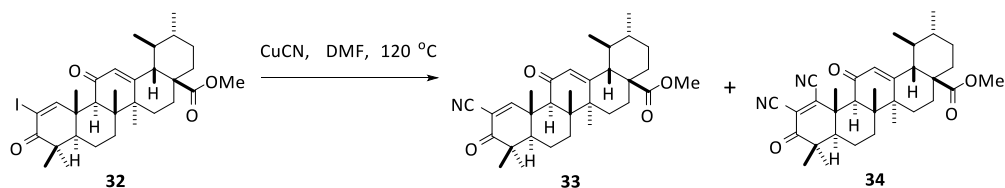

To a stirred solution of iodoenone **32** (286 mg, 0.47 mmol, 1.0 equiv) in anhydrous dimethylformamide (5 mL) was added copper (I) cyanide (51 mg, 0.57 mmol, 1.2 equiv), and the resulting mixture was allowed to heat to  $120^\circ\text{C}$  for 12 h. After the completion of the reaction, it was cooled to room temperature, diluted with ethyl acetate (100 mL). The resulting solution was washed with water (3 x 10 mL), brine (3 x 10 mL), and dried over  $\text{Na}_2\text{SO}_4$ . Removal of solvent and flash column chromatography over silica gel using hexanes:EtOAc (4:1 & 2:1) gave cyanoenone **33** (111 mg, 47%) and biscyanoenone **34** (56 mg, 23%) as yellowish solids, respectively.

$^1\text{H}$  NMR (500 MHz,  $\text{CDCl}_3$ )  $\delta$  8.54 (s, 1H), 5.72 (s, 1H), 3.62 (s, 3H), 2.67 (s, 1H), 2.47 (d, 1H,  $J = 11.2$  Hz), 2.12 (m, 1H), 1.74-1.87 (m, 3H), 1.52-1.70 (m, 6H), 1.24-1.48 (m, 2H), 1.42 (s, 3H), 1.32 (s, 3H), 1.11-1.23 (m, 2H), 1.19 (s, 3H), 1.13 (s,



3H), 0.97 (d, 3H,  $J = 6.6$  Hz), 0.96 (s, 3H), 0.87 (d, 3H,  $J = 6.5$  Hz);  $^{13}\text{C}$  NMR (500 MHz,  $\text{CDCl}_3$ )  $\delta$  198.0, 197.8, 177.3, 173.0, 165.6, 130.1, 115.1, 113.5, 54.3, 53.2, 52.2, 52.1, 47.9, 45.3, 45.1, 44.4, 40.0, 38.9, 38.8, 36.0, 32.1, 30.4, 28.7, 27.8, 24.0, 21.8, 21.3, 21.2, 19.7, 19.4, 18.2, 17.3; IR (solution,  $\text{CHCl}_3$ ): 3019, 2360, 2340, 1717, 1683, 1652, 1558, 1540, 1520, 1507, 1456, 1217, 772, 669; HRMS-ESI (calcd for  $\text{C}_{32}\text{H}_{44}\text{NO}_4$   $[\text{M}+\text{H}]^+$ ) 506.3270, found 506.3230.

$^1\text{H}$  NMR (500 MHz,  $\text{CDCl}_3$ )  $\delta$  5.83 (s, 1H), 3.62 (s, 3H), 2.99 (s, 1H), 2.50 (d, 1H,  $J = 11.2$  Hz), 2.13 (m, 1H), 1.74-1.88(m, 3H), 1.46-1.70 (m, 6H), 1.54 (s, 3H), 1.24-1.46 (m, 3H), 1.40 (s, 3H), 1.30 (s, 3H), 1.18 (s, 3H), 1.04-1.14 (m, 1H), 0.98 (d, 3H,  $J = 6.4$  Hz), 0.96 (s, 3H), 0.91 (d, 3H,  $J = 6.3$  Hz);  $^{13}\text{C}$  NMR (500 MHz,  $\text{CDCl}_3$ )  $\delta$  196.7, 196.3, 177.3, 165.2, 153.4, 129.9, 123.4, 114.3, 112.5, 53.4, 53.3, 52.2, 51.8, 47.9, 46.2, 45.1, 44.7, 41.9, 38.9, 38.8, 36.0, 31.4, 30.5, 30.1, 28.6, 24.0, 21.9, 21.6, 21.2, 21.1, 19.2, 19.0, 17.4; IR (solution,  $\text{CHCl}_3$ ): 3019, 2929, 2360, 2340, 1732, 1716, 1683, 1668, 1653, 1558, 1540, 1520, 1507, 1472, 1456, 1217, 772, 669, 473.

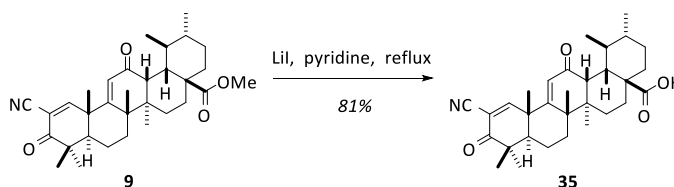

To a stirred solution of CDDU-methyl ester (**9**) (6.0 g, 11.9 mmol, 1.0 equiv) in pyridine (50 mL) was added Lil (16.0 g, 0.12 mol, 10.0 equiv) and the resulting suspension was heated to reflux for 16 hours. Additional Lil (3.2 g, 23.8 mmol, 2.0 equiv) was added and the heating was continued for another 8 hours. After the completion of the reaction, it was cooled to room temperature, and the solvent was removed by vacuum. The reaction was quenched with 2 N HCl (200 mL), and extracted with ethyl acetate (4 x 100 mL). The combined organic extracts were washed with saturated aqueous  $\text{NaHCO}_3$  (50 mL), brine (50 mL), and dried over  $\text{Na}_2\text{SO}_4$ . Removal of solvent and flash column chromatography over silica gel using hexanes:EtOAc (2:1 & 1:1) gave acid **35** (4.7 g, 81%) as a yellowish solid.

$^1\text{H}$  NMR (500 MHz,  $\text{CDCl}_3$ )  $\delta$  8.03 (s, 1H), 6.12 (s, 1H), 2.95 (dd, 1H,  $J_1 = 11.0$  Hz,  $J_2 = 2.5$  Hz), 2.59 (d, 1H,  $J = 3.4$  Hz), 1.66-2.00 (m, 9H), 1.43-1.62 (m, 2H), 1.47 (s, 3H), 1.18-1.34 (m, 3H), 1.26 (s, 3H), 1.20 (s, 3H), 1.19 (s, 3H), 1.13 (s, 3H), 0.82-0.94 (m, 1H), 0.90 (d, 3H,  $J = 5.8$  Hz), 0.75 (d, 3H,  $J = 6.4$  Hz);  $^{13}\text{C}$  NMR (500 MHz,  $\text{CDCl}_3$ )  $\delta$  199.3, 196.8, 170.0, 166.3, 124.8, 115.2, 114.6, 51.4, 47.9, 46.0, 45.3, 42.8, 42.6, 41.2, 39.5, 38.8, 37.0, 31.8, 31.2, 28.5, 27.6, 25.5, 23.8, 21.8, 20.9, 20.0, 19.6, 18.4; IR (solution,  $\text{CHCl}_3$ ): 3019, 2360, 2340, 1716, 1698, 1684, 1652, 1558, 1540, 1520, 1507, 1456, 1217, 772, 669; HRMS-ESI (calcd for  $\text{C}_{31}\text{H}_{42}\text{NO}_4$   $[\text{M}+\text{H}]^+$ ) 492.3114, found 492.3108.

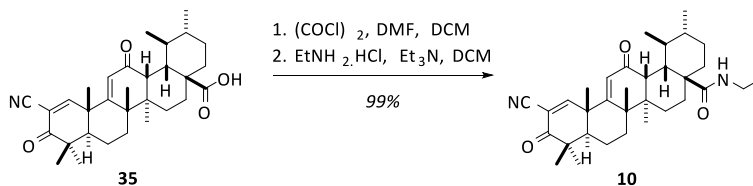

To a stirred solution of acid **35** (400 mg, 0.81 mmol, 1.0 equiv) in methylene chloride (15 mL) was added oxalyl chloride (0.35 mL, 4.05 mmol, 5.0 equiv) and anhydrous dimethylformamide (0.11  $\mu\text{L}$ , 2.0  $\mu\text{mol}$ , catalytic) slowly at 0  $^\circ\text{C}$ , and it was allowed to warm to room temperature for 2 h. The solvent was removed, and toluene (10 mL) was added and removed by vacuum, which was repeated for three times to provide the corresponding acyl chloride.

To a stirred solution of the resulting acyl chloride obtained above in methylene chloride (10 mL) was added triethylamine (0.58 mL, 4.05 mmol, 5.0 equiv) followed by slow addition of ethylamine hydrochloride (340 mg, 4.05 mmol, 5.0 equiv) at 0 °C. After the addition, the resulting mixture was allowed to warm to room temperature and kept stirring until the disappearance of acyl chloride. After the completion of the reaction, the solvent was removed and it was diluted with methylene chloride (80 mL), washed with 1 N HCl (10 mL), saturated aqueous NaHCO<sub>3</sub> (10 mL), brine (10 mL), and dried over Na<sub>2</sub>SO<sub>4</sub>. Removal of solvent and flash column chromatography over silica gel using hexanes:EtOAc (2:1 & 1:1) g ethylve amide **10** (418 mg, 99%) as a yellowish solid.

<sup>1</sup>H NMR (500 MHz, CDCl<sub>3</sub>) δ 8.49 (s, 1H), 6.36 (s, 1H), 6.16 (t, 1H, *J* = 5.5 Hz), 3.33 (m, 1H), 3.21 (m, 1H), 2.68 (dd, 1H, *J*<sub>1</sub> = 10.7 Hz, *J*<sub>2</sub> = 2.2 Hz), 2.62 (d, 1H, *J* = 3.4 Hz), 1.60-1.99 (m, 9H), 1.46-1.60 (m, 2H), 1.44 (s, 3H), 1.05-1.30 (m, 3H), 1.28 (s, 3H), 1.24 (s, 3H), 1.19 (s, 3H), 1.10 (s, 3H), 0.85-0.95 (m, 1H), 0.90 (d, 3H, *J* = 6.1 Hz), 0.68 (d, 3H, *J* = 6.6 Hz); <sup>13</sup>C NMR (500 MHz, CDCl<sub>3</sub>) δ 200.5, 197.1, 177.4, 171.1, 168.1, 124.9, 115.1, 114.8, 51.0, 49.3, 47.8, 46.2, 45.3, 43.8, 43.2, 41.2, 39.9, 39.0, 37.9, 34.6, 31.9, 31.4, 29.6, 28.2, 27.4, 27.3, 25.8, 23.7, 21.8, 21.0, 19.5, 19.4, 15.2; IR (solution, CHCl<sub>3</sub>): 3019, 2979, 2360, 2340, 1698, 1684, 1652, 1636, 1558, 1540, 1520, 1507, 1456, 1217, 771, 669, 444; HRMS-ESI (calcd for C<sub>33</sub>H<sub>47</sub>N<sub>2</sub>O<sub>3</sub> [M+H]<sup>+</sup>) 519.3587, found 519.3585.

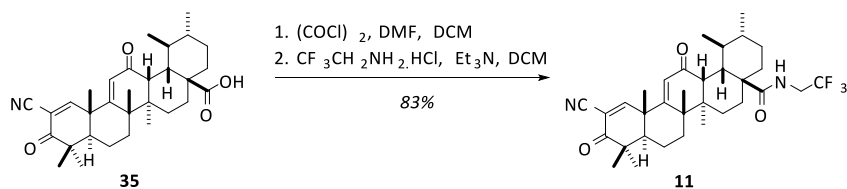

To a stirred solution of acid **35** (400 mg, 0.81 mmol, 1.0 equiv) in methylene chloride (15 mL) was added oxalyl chloride (0.35 mL, 4.05 mmol, 5.0 equiv) and anhydrous dimethylformamide (0.11 μL, 2.0 μmol, catalytic) slowly at 0 °C, and it was allowed to warm to room temperature for 2 h. The solvent was removed, and toluene (10 mL) was added and removed by vacuum, which was repeated for three times to provide the corresponding acyl chloride.

To a stirred solution of the resulting acyl chloride obtained above in methylene chloride (10 mL) was added triethylamine (0.58 mL, 4.05 mmol, 5.0 equiv) followed by slow addition of ethylamine hydrochloride (340 mg, 4.05 mmol, 5.0 equiv) at 0 °C. After the addition, the resulting mixture was allowed to warm to room temperature and kept stirring until the disappearance of acyl chloride. After the completion of the reaction, the solvent was removed and it was diluted with methylene chloride (80 mL), washed with 1 N HCl (10 mL), saturated aqueous NaHCO<sub>3</sub> (10 mL), brine (10 mL), and dried over Na<sub>2</sub>SO<sub>4</sub>. Removal of solvent and flash column chromatography over silica gel using hexanes:EtOAc (2:1 & 1:1) gave trifluoroethyl amide **11** (387 mg, 83%) as a yellowish solid.

<sup>1</sup>H NMR (500 MHz, CDCl<sub>3</sub>) δ 9.14 (s, 1H), 6.92 (t, 1H, *J* = 6.5 Hz), 6.74 (t, 1H, *J* = 5.5 Hz), 4.20 (m, 1H), 3.55 (m, 1H), 2.89 (dd, 1H, *J*<sub>1</sub> = 9.9 Hz, *J*<sub>2</sub> = 2.8 Hz), 2.48 (d, 1H, *J* = 3.2 Hz), 1.93-2.15 (m, 1H), 1.69-1.92 (m, 6H), 1.47-1.65 (m, 4H), 1.55 (s, 3H), 1.05-1.30 (m, 3H), 1.29 (s, 3H), 1.23 (s, 3H), 1.18 (s, 3H), 1.05 (s, 3H), 0.85-0.95 (m, 1H), 0.87 (d, 3H, *J* = 6.6 Hz), 0.57 (d, 3H, *J* = 6.6 Hz); <sup>13</sup>C NMR (500 MHz, CDCl<sub>3</sub>) δ 200.3, 197.2, 178.2, 171.2, 169.4, 125.0, 124.5 (q), 115.6, 114.4, 51.1, 49.8, 47.7, 46.1, 45.3, 43.4, 43.3, 41.1, 40.5 (s), 39.7, 38.7, 37.4, 31.9, 31.3, 29.6, 27.9, 27.1, 27.0, 25.9, 23.7, 21.8, 20.9, 19.4, 18.3; <sup>19</sup>F NMR (500 MHz, CDCl<sub>3</sub>) δ 72.8; IR (solution, CHCl<sub>3</sub>): 3019, 2957, 2869, 2360, 2340, 1652, 1558, 1539, 1520, 1507, 1465, 1436, 1376, 1364, 1217, 772, 669; HRMS-ESI (calcd for C<sub>33</sub>H<sub>44</sub>N<sub>2</sub>F<sub>3</sub>O<sub>3</sub> [M+H]<sup>+</sup>) 573.3304, found 573.3307.

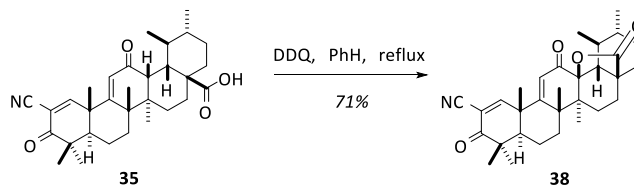

To a stirred solution of acid **35** (250 mg, 0.51 mmol, 1.0 equiv) in benzene (15 mL) was added DDQ (136 mg, 0.61 mmol, 1.2 equiv) and the resulting mixture was heated to reflux for 24 h. After the completion of the reaction, it was cooled to room temperature and filtered through celite. Removal of solvent and flash column chromatography over silica gel using hexanes:EtOAc (4:1 & 2:1) gave the desired product **38** (175.5 mg, 71%) as a reddish solid.

$^1\text{H}$  NMR (500 MHz,  $\text{CDCl}_3$ )  $\delta$  8.05 (s, 1H), 6.28 (s, 1H), 2.56 (d, 1H,  $J = 11.7$  Hz), 2.12 (m, 1H), 1.71-1.92 (m, 4H), 1.60-1.70 (m, 3H), 1.57 (s, 3H), 1.50 (s, 3H), 1.39-1.50 (m, 2H), 1.22-1.44 (m, 1H), 1.28 (s, 3H), 1.21 (s, 3H), 1.18 (s, 3H), 1.00-1.10 (m, 1H), 0.95 (d, 3H,  $J = 6.3$  Hz), 0.82-0.90 (m, 1H), 0.82 (d, 3H,  $J = 6.4$  Hz);  $^{13}\text{C}$  NMR (500 MHz,  $\text{CDCl}_3$ )  $\delta$  196.6, 192.2, 178.3, 174.3, 165.7, 123.4, 115.4, 114.5, 87.8, 55.1, 48.1, 46.4, 45.3, 45.1, 43.2, 42.9, 39.8, 37.5, 32.8, 31.3, 31.2, 30.8, 28.0, 27.6, 26.3, 21.9, 21.8, 20.3, 19.5, 18.6, 17.8; IR (solution,  $\text{CHCl}_3$ ): 3019, 2969, 2936, 2360, 2340, 1772, 1715, 1697, 1675, 1652, 1558, 1540, 1520, 1507, 1456, 1215, 909, 749, 669; HRMS-ESI (calcd for  $\text{C}_{31}\text{H}_{40}\text{NO}_4$   $[\text{M}+\text{H}]^+$ ) 490.2957, found 490.2961.

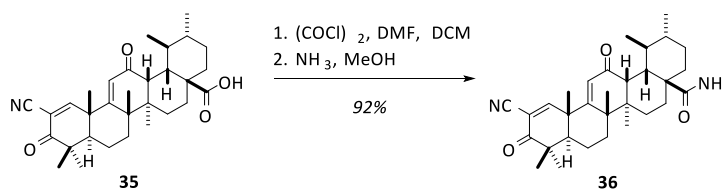

To a stirred solution of acid **35** (860 mg, 1.75 mmol, 1.0 equiv) in methylene chloride (15 mL) was added oxalyl chloride (0.50 mL, 5.72 mmol, 3.3 equiv) and anhydrous dimethylformamide (0.15  $\mu\text{L}$ , 2.7  $\mu\text{mol}$ , catalytic) slowly at 0  $^\circ\text{C}$ , and it was allowed to warm to room temperature for 2 h. The solvent was removed, and toluene (10 mL) was added and removed by vacuum, which was repeated for three times to provide the corresponding acyl chloride.

To a stirred solution of the resulting acyl chloride obtained above in methylene chloride (20 mL) was added ammonia (8.75 mL, 1.0 M in MeOH, 8.75 mmol, 5.0 equiv), and the resulting mixture was stirred at room temperature until the disappearance of acyl chloride. After the completion of the reaction, the solvent was removed and flash column chromatography over silica gel using hexanes:EtOAc (1:1 & 1:2) gave ethyl amide **36** (791 mg, 92%) as a yellowish solid.

$^1\text{H}$  NMR (500 MHz,  $\text{CDCl}_3$ )  $\delta$  8.06 (s, 1H), 6.28 (s, 1H), 2.51 (d, 1H,  $J = 11.7$  Hz), 2.10 (m, 1H), 1.69-1.90 (m, 6H), 1.51-1.67 (m, 4H), 1.54 (s, 3H), 1.34-1.50 (m, 2H), 1.46 (s, 3H), 1.10-1.30 (m, 2H), 1.23 (s, 3H), 1.17 (s, 3H), 1.15 (s, 3H), 0.82-0.92 (m, 1H), 0.91 (d, 3H,  $J = 6.3$  Hz), 0.78 (d, 3H,  $J = 6.1$  Hz);  $^{13}\text{C}$  NMR (500 MHz,  $\text{CDCl}_3$ )  $\delta$  200.3, 197.0, 180.4, 171.1, 167.7, 124.9, 115.0, 114.9, 51.2, 49.8, 47.8, 46.2, 45.3, 43.9, 43.1, 41.2, 39.9, 39.0, 37.9, 31.9, 31.4, 28.2, 27.5, 25.9, 23.7, 21.8, 20.9, 20.1, 19.5, 18.4; IR (solution,  $\text{CHCl}_3$ ): 3019, 2360, 2340, 1652, 1558, 1540, 1507, 1217, 771, 669, 429; HRMS-ESI (calcd for  $\text{C}_{31}\text{H}_{43}\text{N}_2\text{O}_3$   $[\text{M}+\text{H}]^+$ ) 491.3114, found 491.3105.

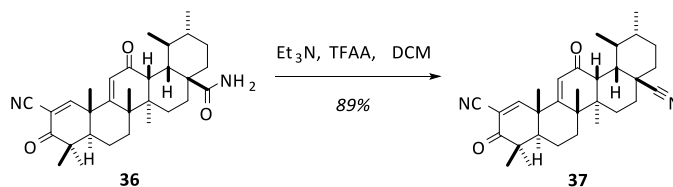

To a stirred solution of amide **36** (600 mg, 1.22 mmol, 1.0 equiv) in methylene chloride (40 mL) at 0 °C was added triethylamine (0.44 mL, 3.13 mmol, 2.5 equiv) and trifluoroacetic anhydride (0.26 mL), and the resulting mixture was stirred at 0 °C until the disappearance of starting material. After the completion of the reaction, it was quenched with saturated aqueous NaHCO<sub>3</sub> (20 mL), and extracted with methylene chloride (3 x 20 mL). The combined organic extracts were washed with brine (10 mL) and dried over Na<sub>2</sub>SO<sub>4</sub>. Removal of solvent and flash column chromatography over silica gel using hexanes:EtOAc (4:1 & 2:1) gave the desired product **37** (407 mg, 89%) as a white solid.

<sup>1</sup>H NMR (500 MHz, CDCl<sub>3</sub>) δ 8.06 (s, 1H), 6.16 (s, 1H), 3.17 (d, 1H, *J* = 3.7 Hz), 2.72 (dd, 1H, *J*<sub>1</sub> = 11.2 Hz, *J*<sub>2</sub> = 3.2 Hz), 1.95-2.18 (m, 4H), 1.74-1.86 (m, 3H), 1.55-1.66 (m, 3H), 1.53 (s, 3H), 1.34-1.50 (m, 2H), 1.45 (s, 3H), 1.27 (s, 3H), 1.16-1.26 (m, 2H), 1.20 (s, 3H), 1.12 (s, 3H), 0.92 (d, 3H, *J* = 5.6 Hz), 0.82-0.92 (m, 1H), 0.76 (d, 3H, *J* = 6.6 Hz); <sup>13</sup>C NMR (500 MHz, CDCl<sub>3</sub>) δ 198.1, 196.8, 170.4, 166.1, 125.0, 124.8, 115.2, 114.6, 51.5, 48.0, 46.1, 45.3, 44.3, 43.0, 41.5, 41.2, 39.0, 38.7, 36.7, 32.0, 30.6, 28.8, 27.6, 27.5, 25.8, 25.6, 21.8, 20.6, 19.8, 19.6, 18.4; IR (solution, CHCl<sub>3</sub>): 3019, 2360, 2340, 1697, 1684, 1662, 1653, 1558, 1540, 1520, 1507, 1473, 1456, 1217, 909, 772, 669, 450; HRMS-ESI (calcd for C<sub>31</sub>H<sub>41</sub>N<sub>2</sub>O<sub>2</sub> [M+H]<sup>+</sup>) 473.3168, found 473.3165.

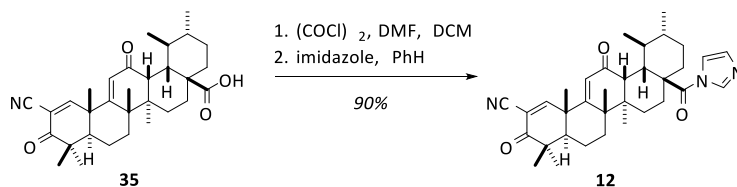

To a stirred solution of acid **35** (460 mg, 1.0 mmol, 1.0 equiv) in methylene chloride (20 mL) was added oxalyl chloride (0.50 mL, 5.8 mmol, 5.8 equiv) and anhydrous dimethylformamide (0.15 μL, 2.0 μmol, catalytic) slowly at 0 °C, and it was allowed to warm to room temperature for 2 h. The solvent was removed, and toluene (10 mL) was added and removed by vacuum, which was repeated for three times to provide the corresponding acyl chloride.

To a stirred solution of the resulting acyl chloride obtained above in benzene (10 mL) was added imidazole (350 mg, 5.0 mmol, 5.0 equiv) and the resulting mixture was stirred at room temperature until the disappearance of acyl chloride. After the completion of the reaction, removal of solvent and flash column chromatography over silica gel using hexanes:EtOAc (4:1 & 2:1) gave ethyl amide **12** (458 mg, 90%) as a yellowish solid.

<sup>1</sup>H NMR (500 MHz, CDCl<sub>3</sub>) δ 8.34 (s, 1H), 8.05 (s, 1H), 7.66 (s, 1H), 7.06 (s, 1H), 6.10 (s, 1H), 3.27 (d, 1H, *J* = 9.8 Hz), 2.43 (s, 1H), 0.98-2.06 (m, 11H), 1.44 (s, 3H), 1.23 (s, 3H), 1.16 (s, 9H), 0.96 (d, 3H, *J* = 5.1 Hz), 0.78 (d, 3H, *J* = 5.9 Hz); <sup>13</sup>C NMR (500 MHz, CDCl<sub>3</sub>) δ 197.9, 196.8, 175.5, 170.2, 166.3, 137.8, 130.6, 124.6, 117.9, 115.1, 114.6, 52.6, 51.1, 47.9, 46.0, 45.2, 43.1, 42.9, 41.3, 39.9, 38.8, 35.8, 31.7, 31.0, 28.1, 27.5, 27.5, 25.4, 21.8, 20.8, 20.0, 19.7, 18.3; IR (solution, CHCl<sub>3</sub>): 3019, 2360, 2340, 1716, 1698, 1652, 1558, 1540, 1520, 1507, 1214, 909, 773, 669, 438; HRMS-ESI (calcd for C<sub>34</sub>H<sub>44</sub>N<sub>3</sub>O<sub>3</sub> [M+H]<sup>+</sup>) 542.3383, found 542.3377.

## Bibliography.

1. M. Frigerio, M. Santagostino, S. Sputore, *J. Org. Chem.* 1999, **64**, 4537.
2. C.-M. Ma, S.-Q. Cai, J.-R. Cui, R.-Q. Wang, P.-F. Tu, M. Hattori, M. Daneshtalab, *Eur. J. Med. Chem.* **2005**, *40*, 582-589.

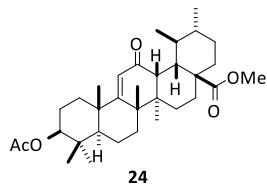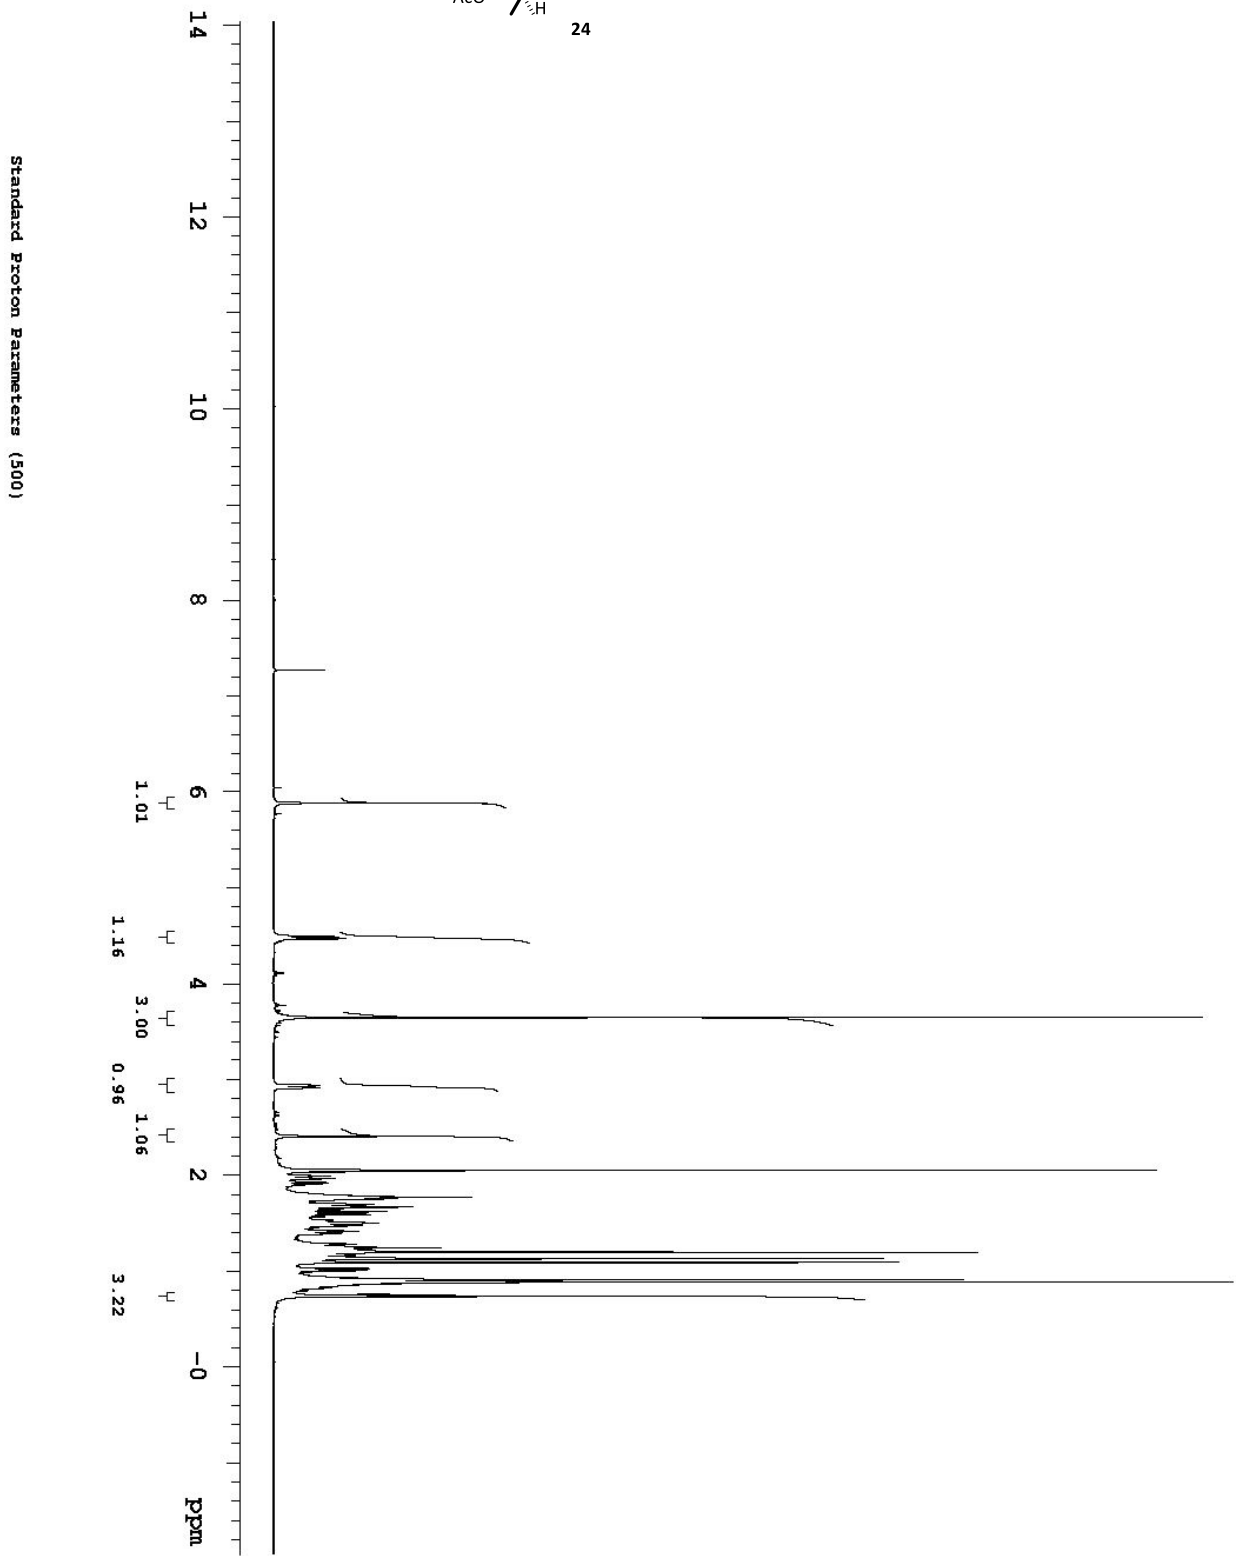



STANDARD CARBON PARAMETERS (500)

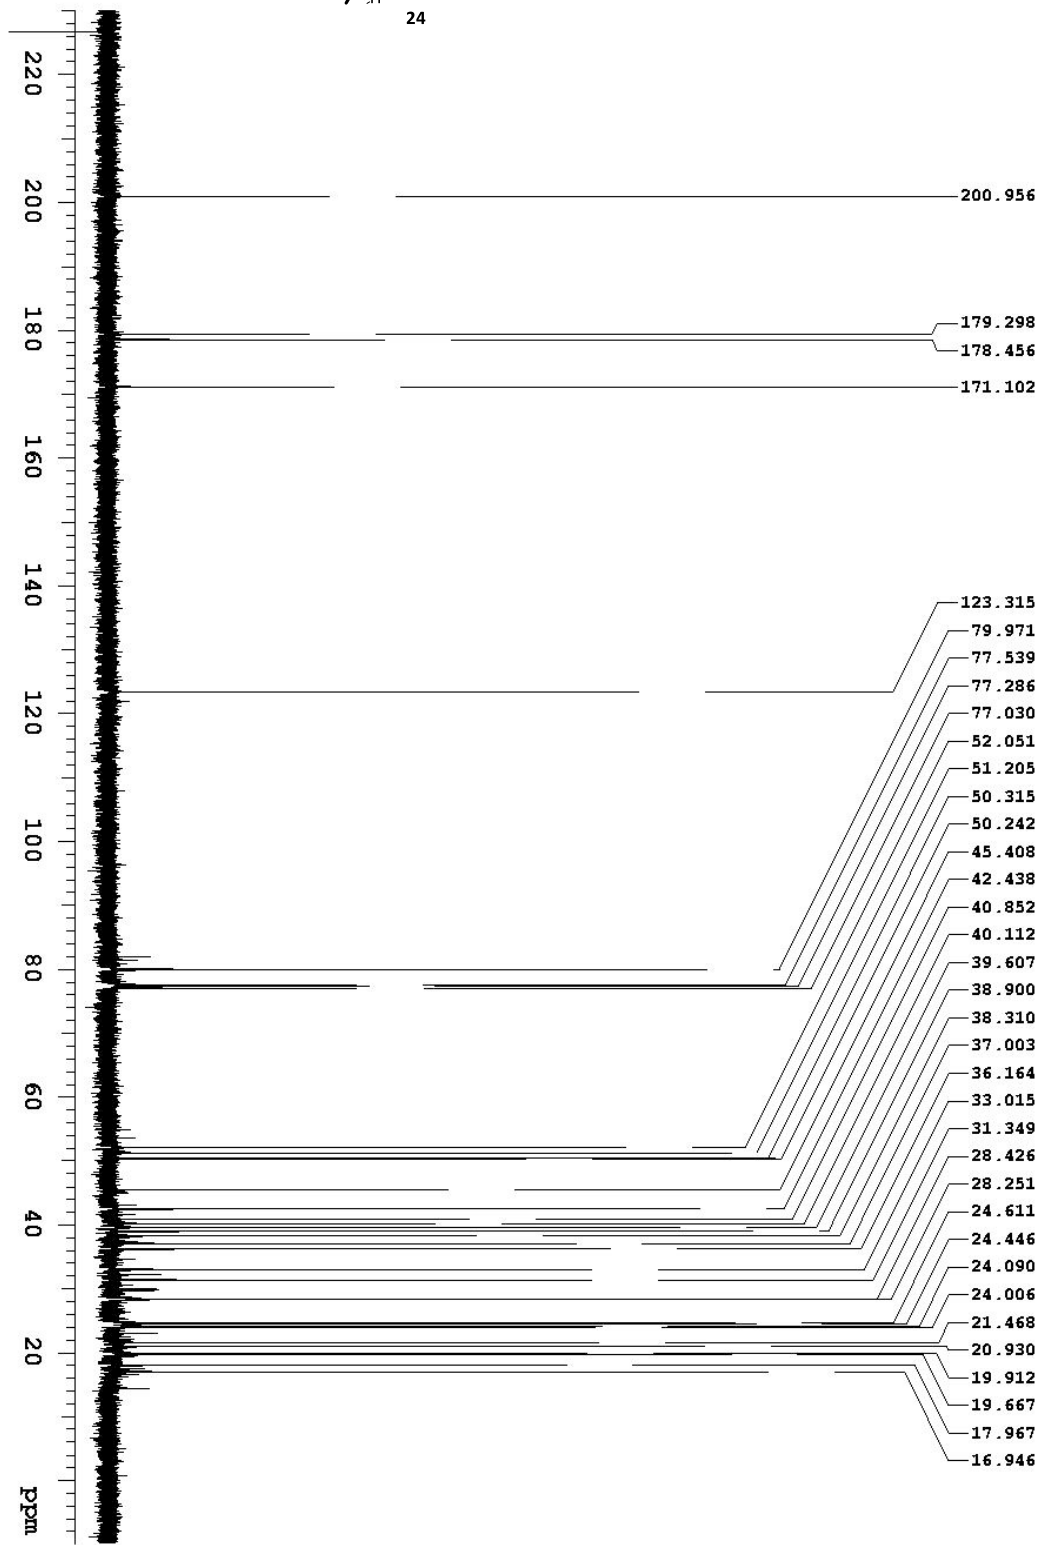



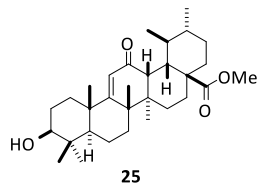

Standard Proton Parameters (500)

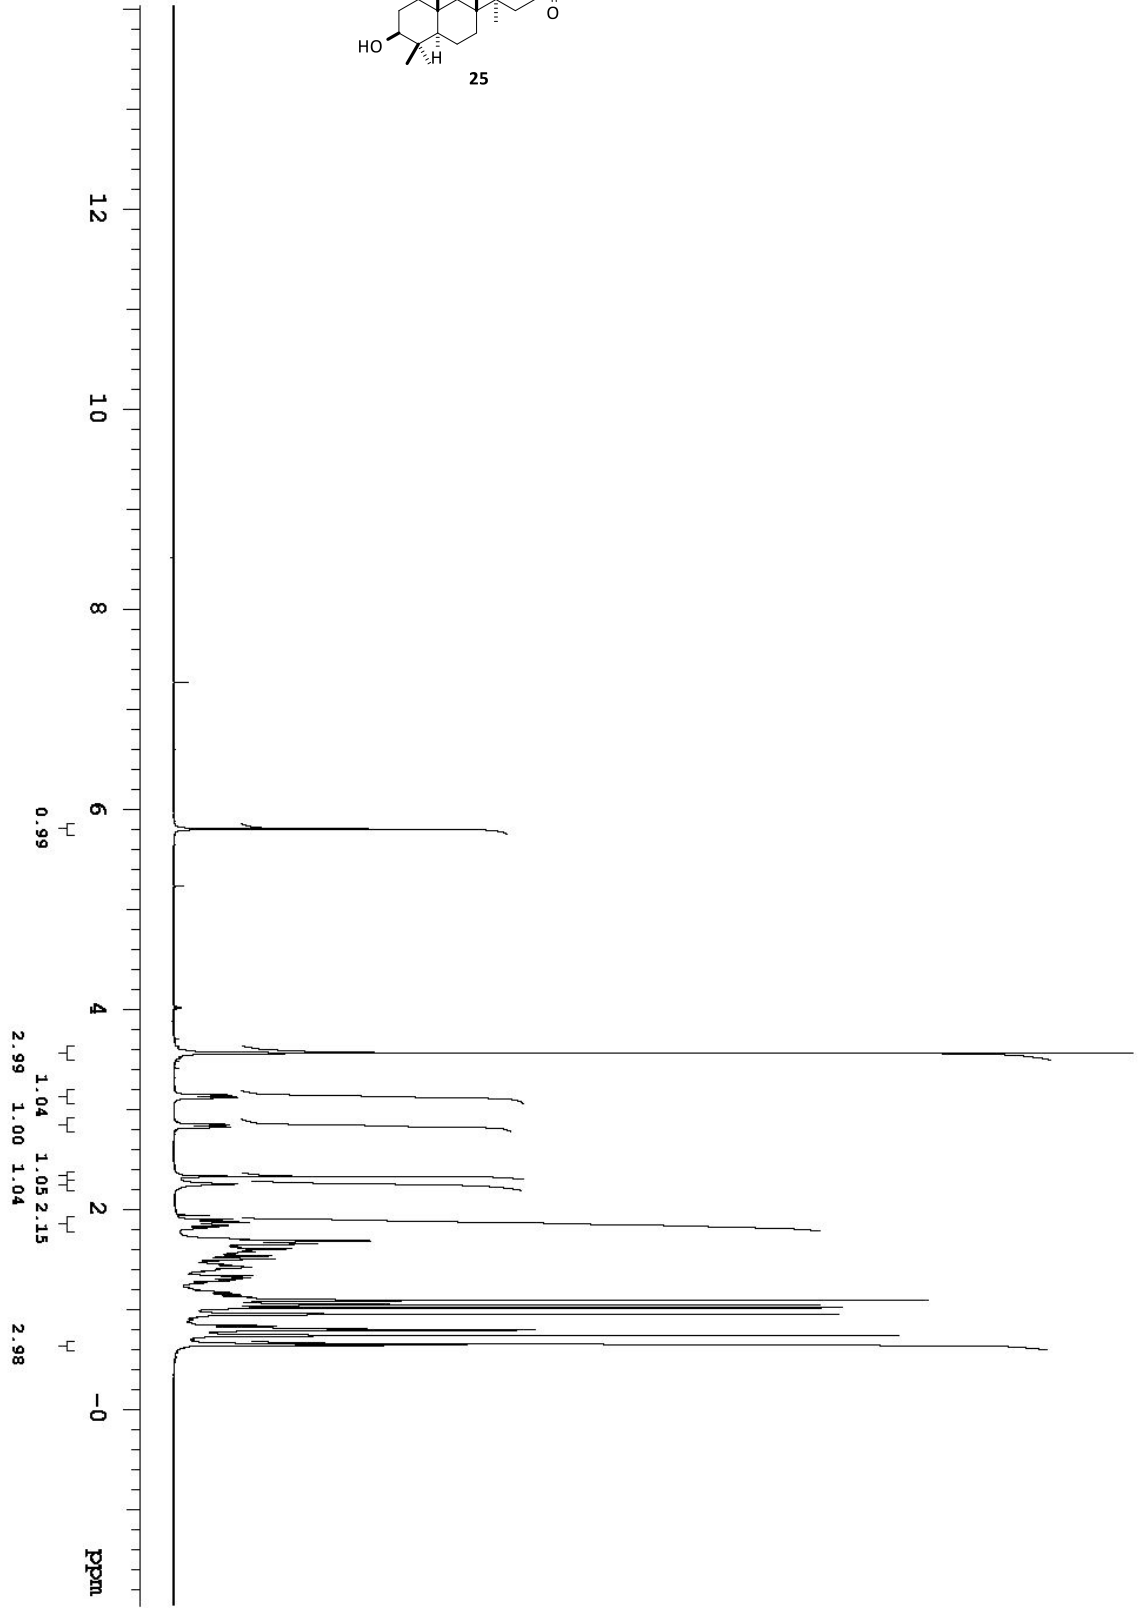

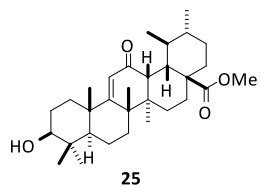

STANDARD CARBON PARAMETERS (500)

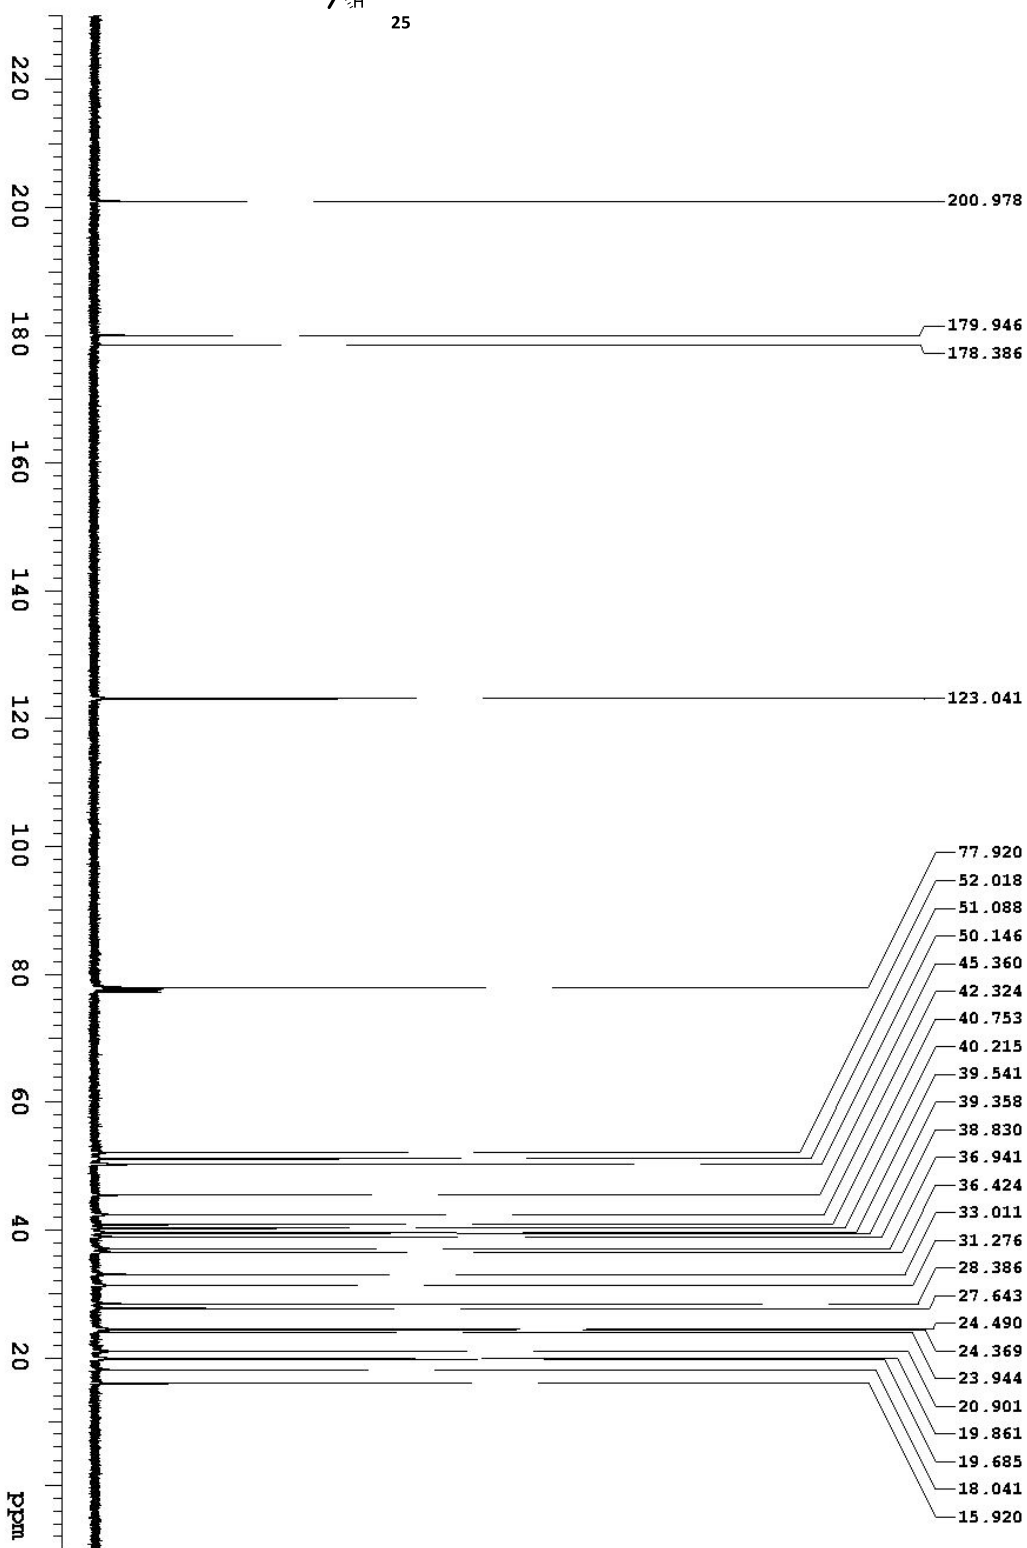

Standard Proton Parameters (500)

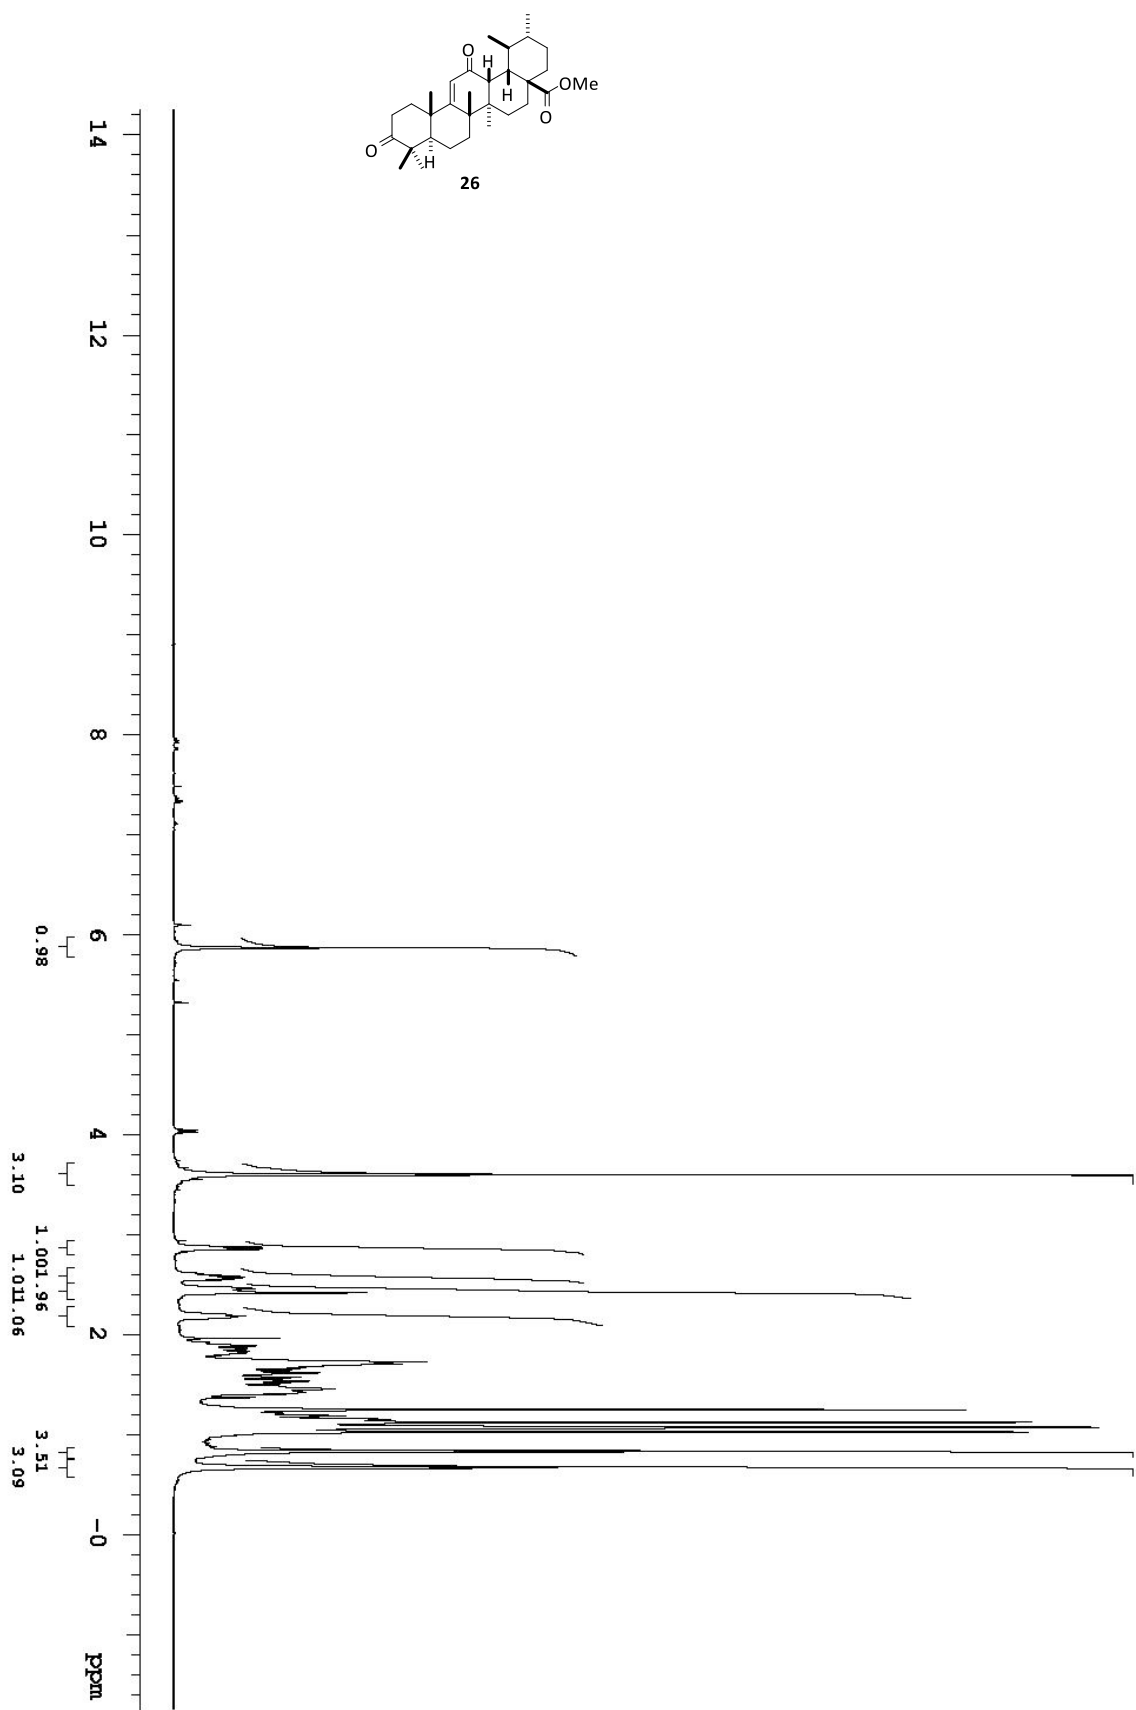

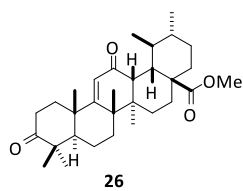

STANDARD CARBON PARAMETERS (500)

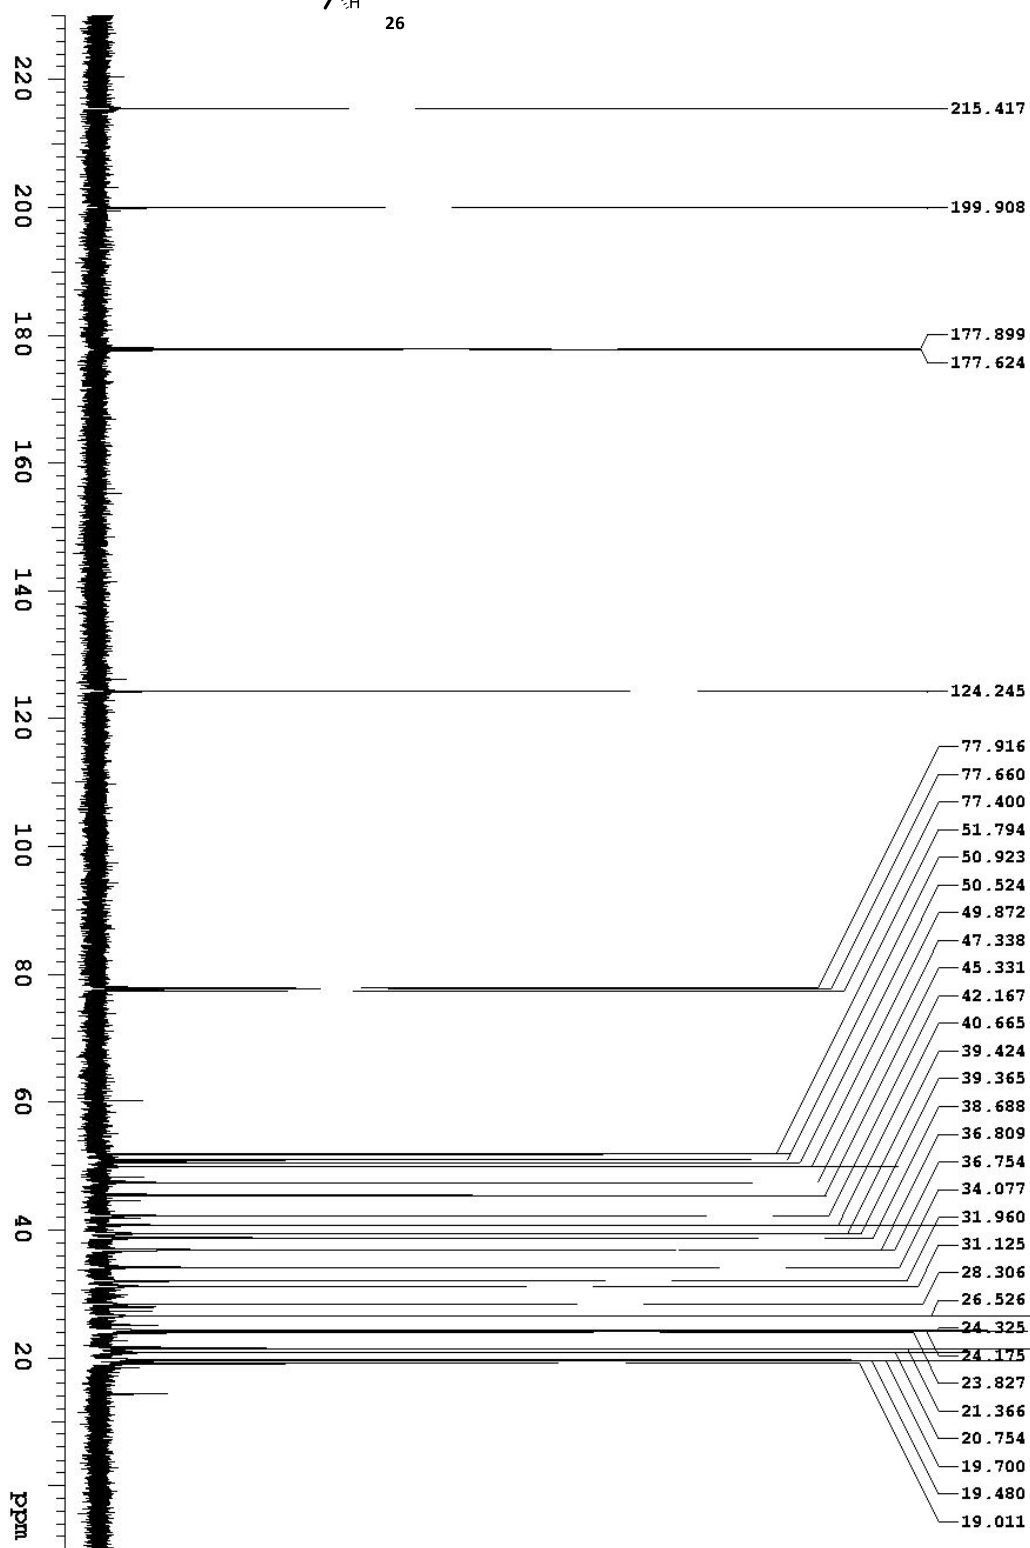

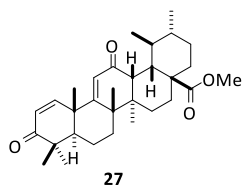

Standard Proton Parameters (500)

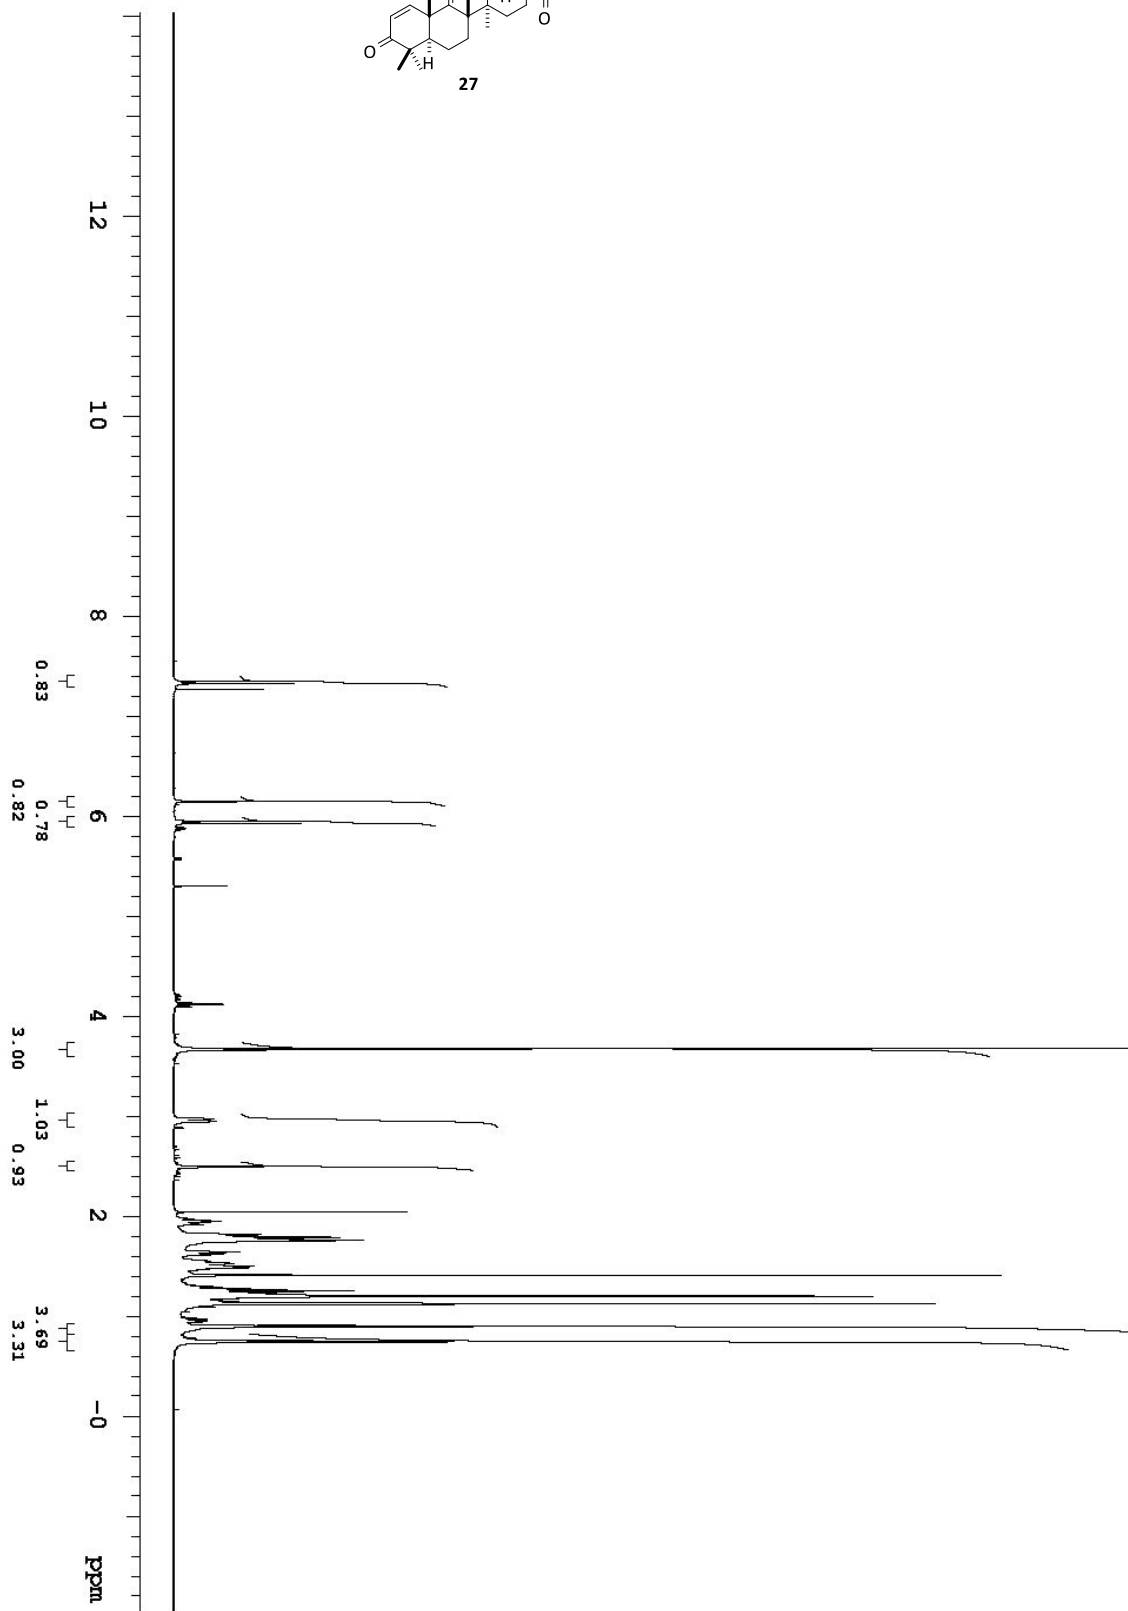



STANDARD CARBON PARAMETERS (500)

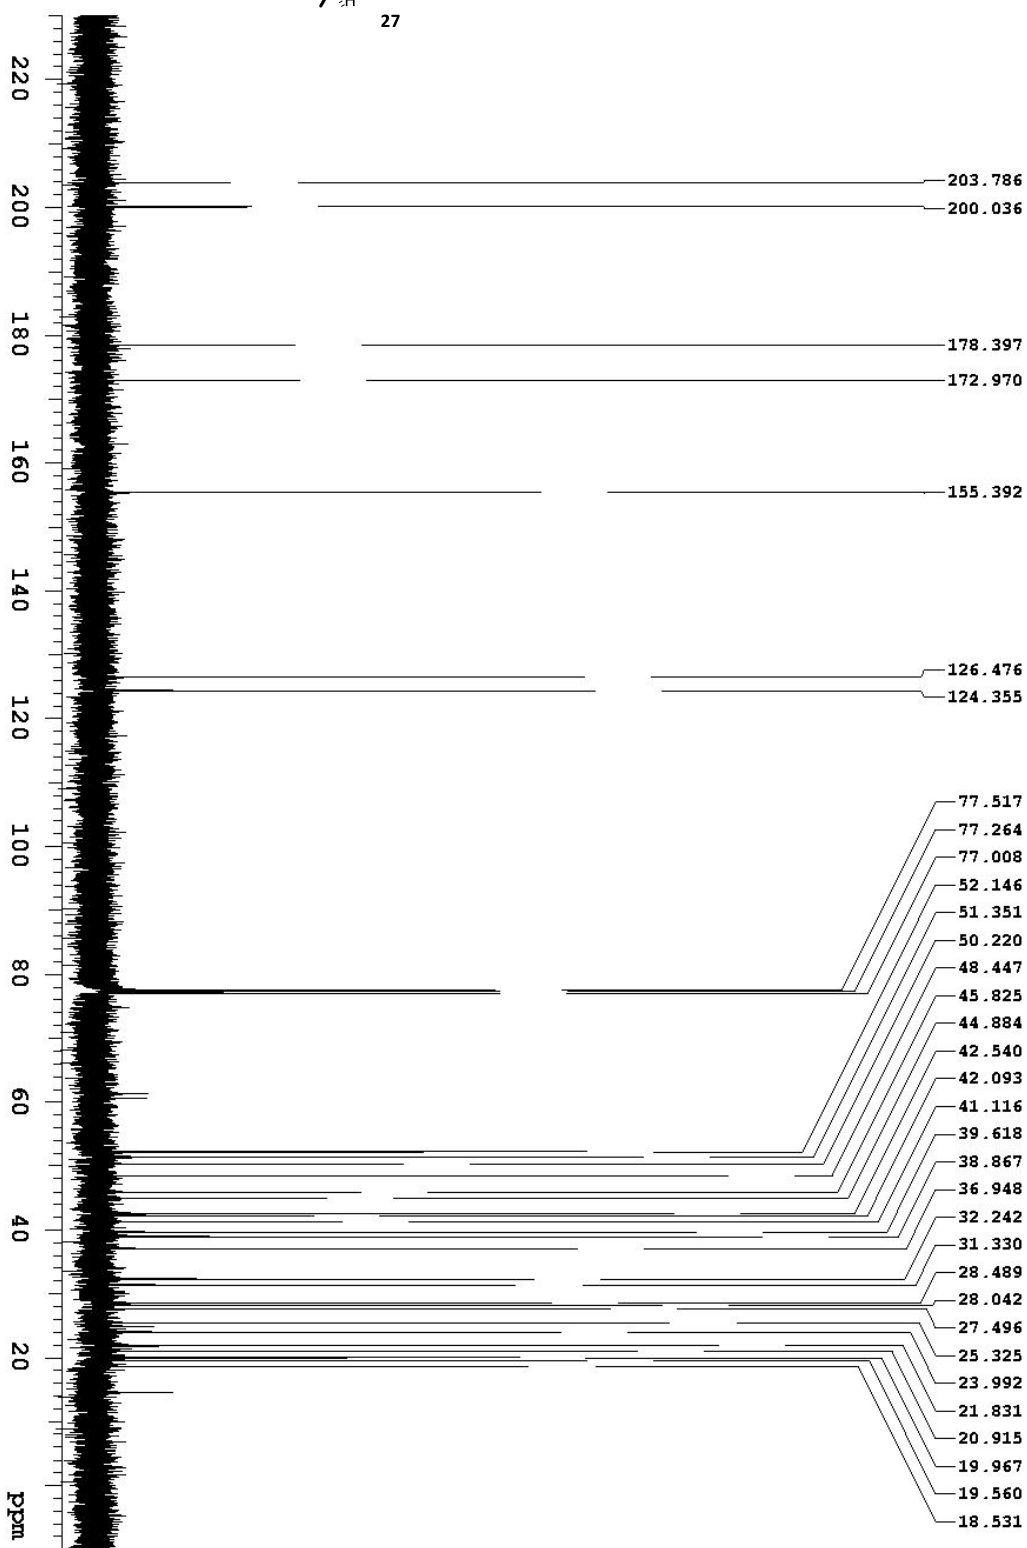

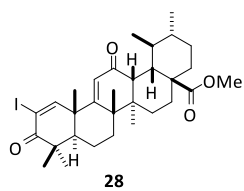

Standard Proton Parameters (500)

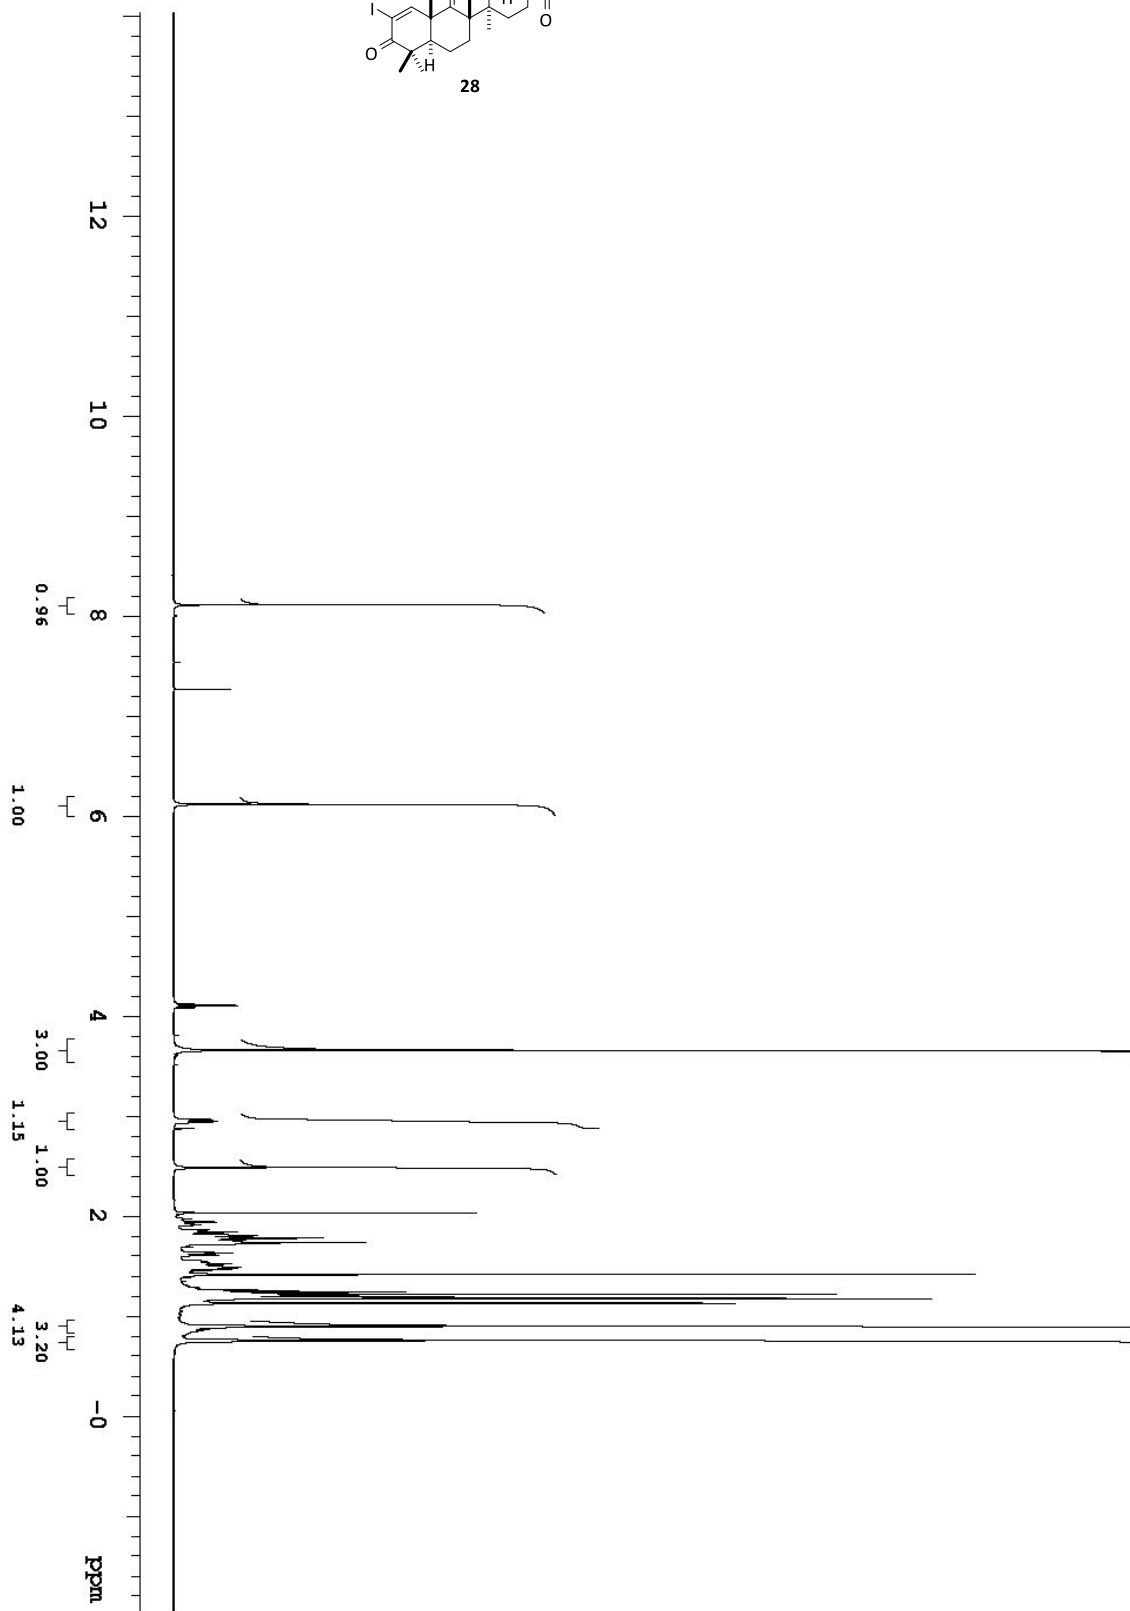





STANDARD CARBON PARAMETERS (500)

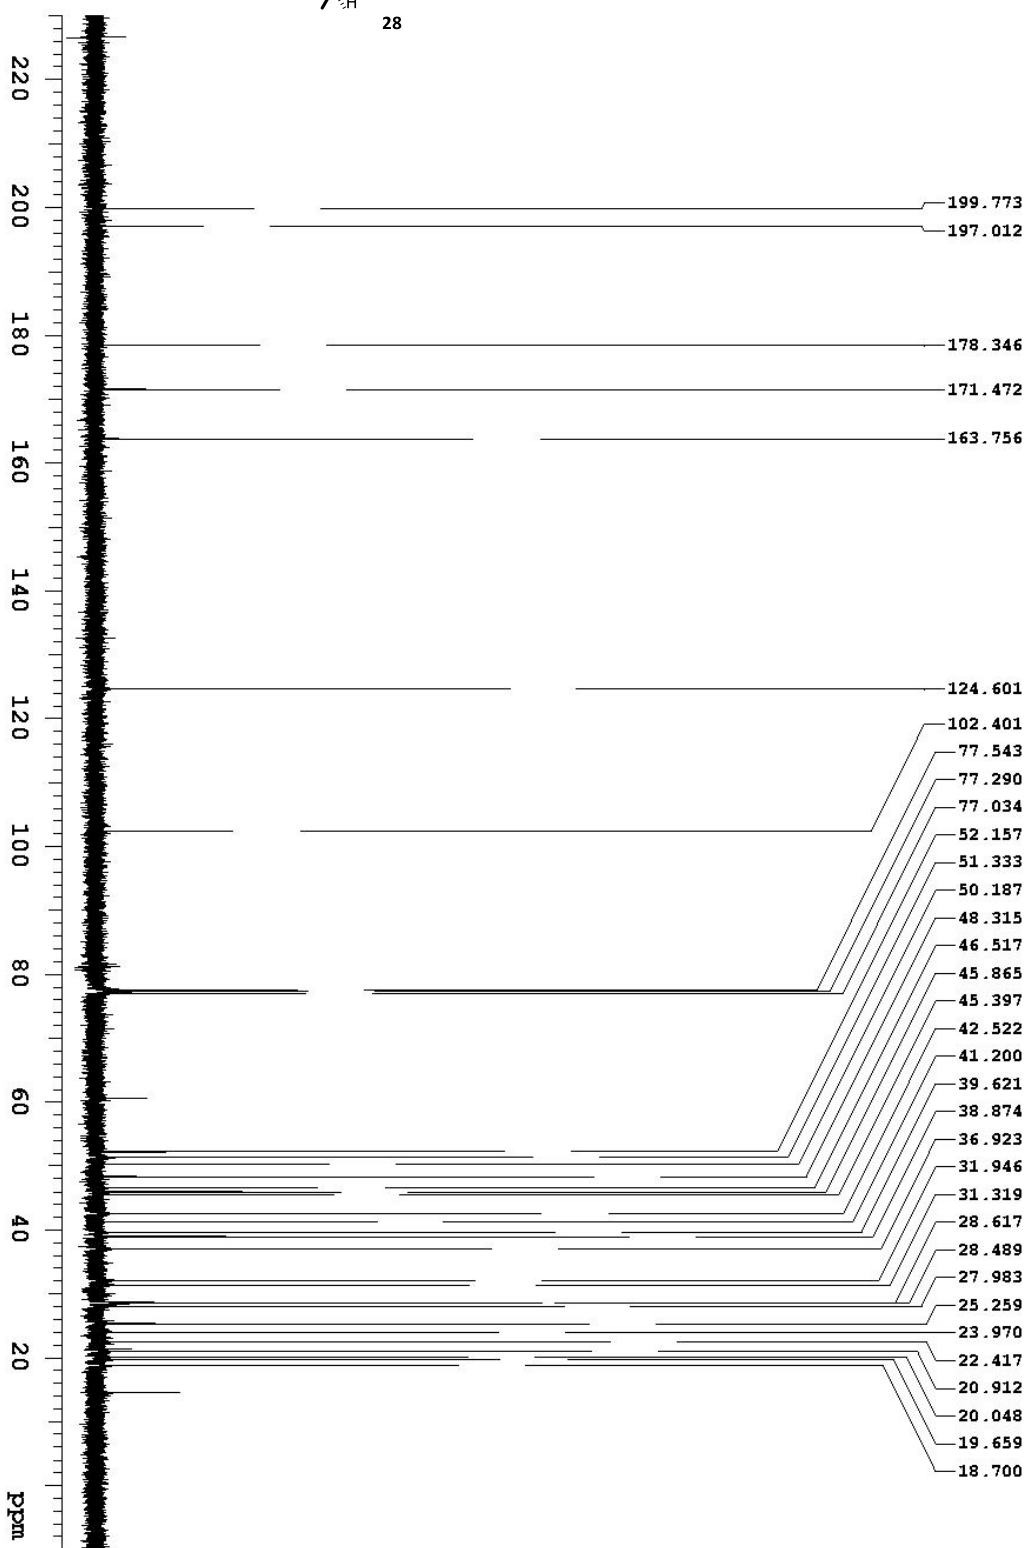

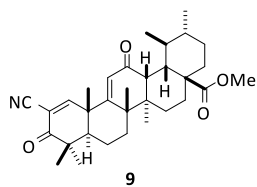

Standard Proton Parameters (500)

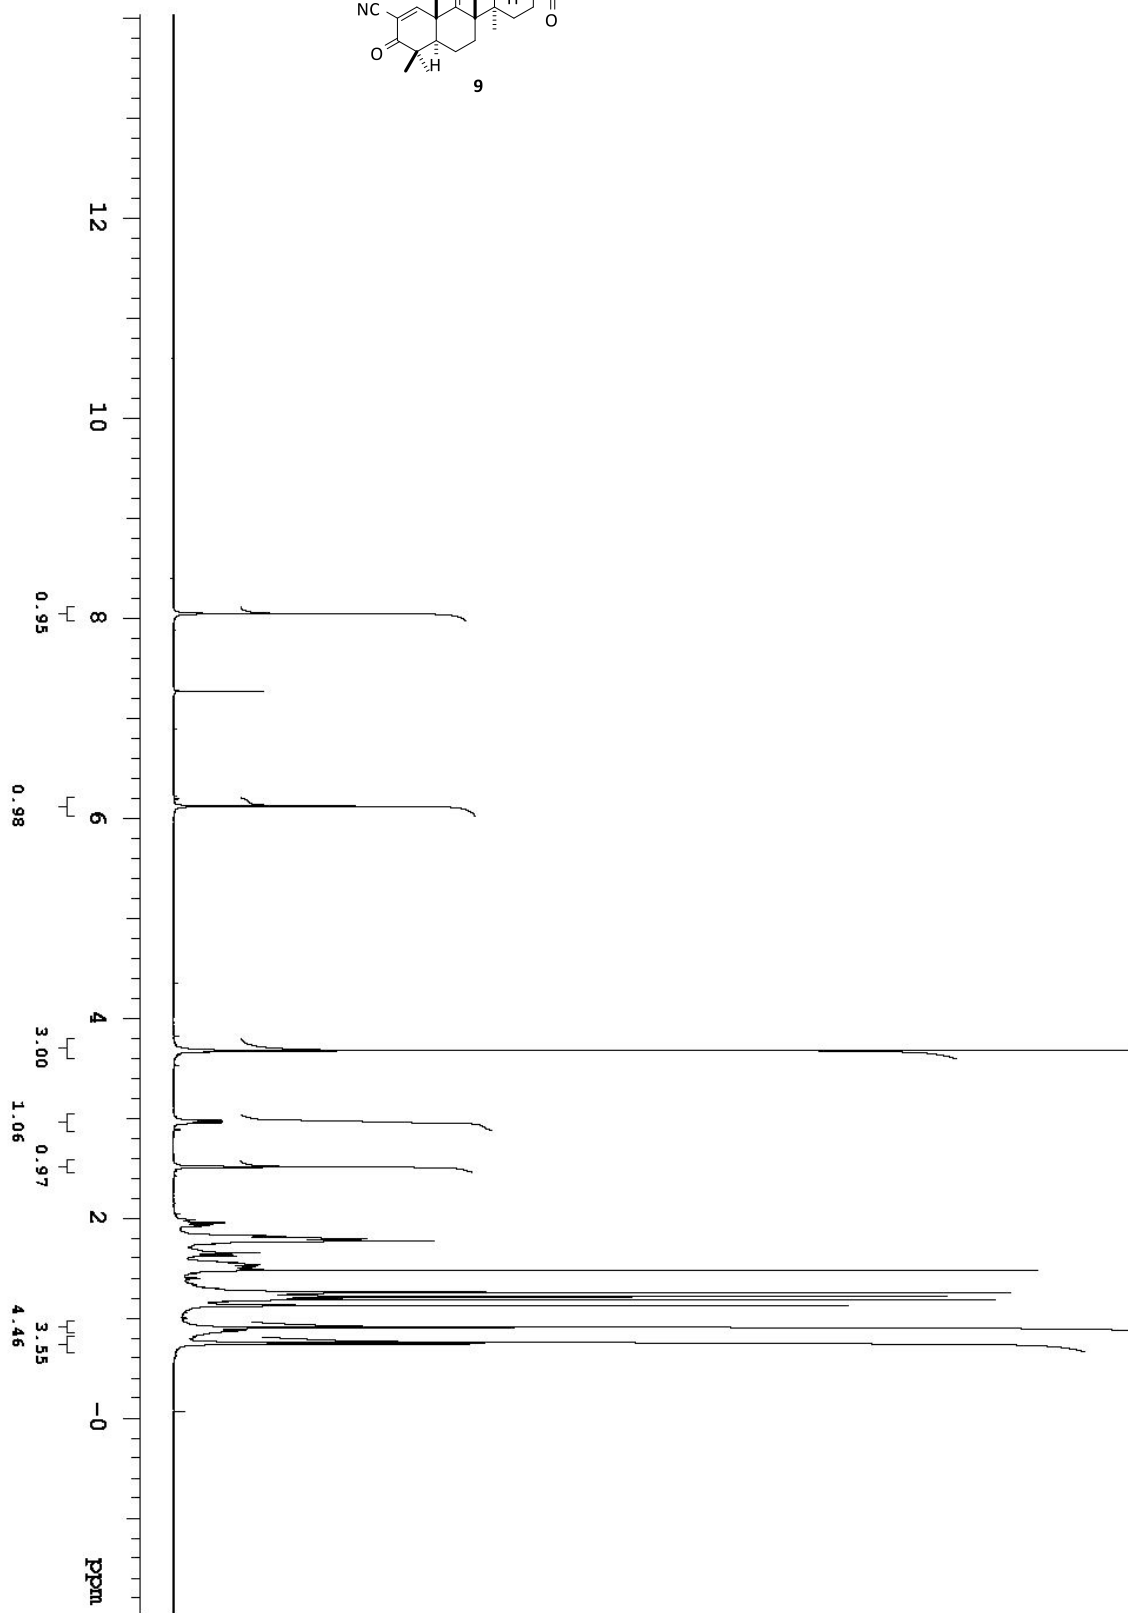

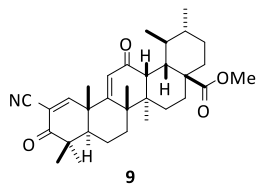

STANDARD CARBON PARAMETERS (500)

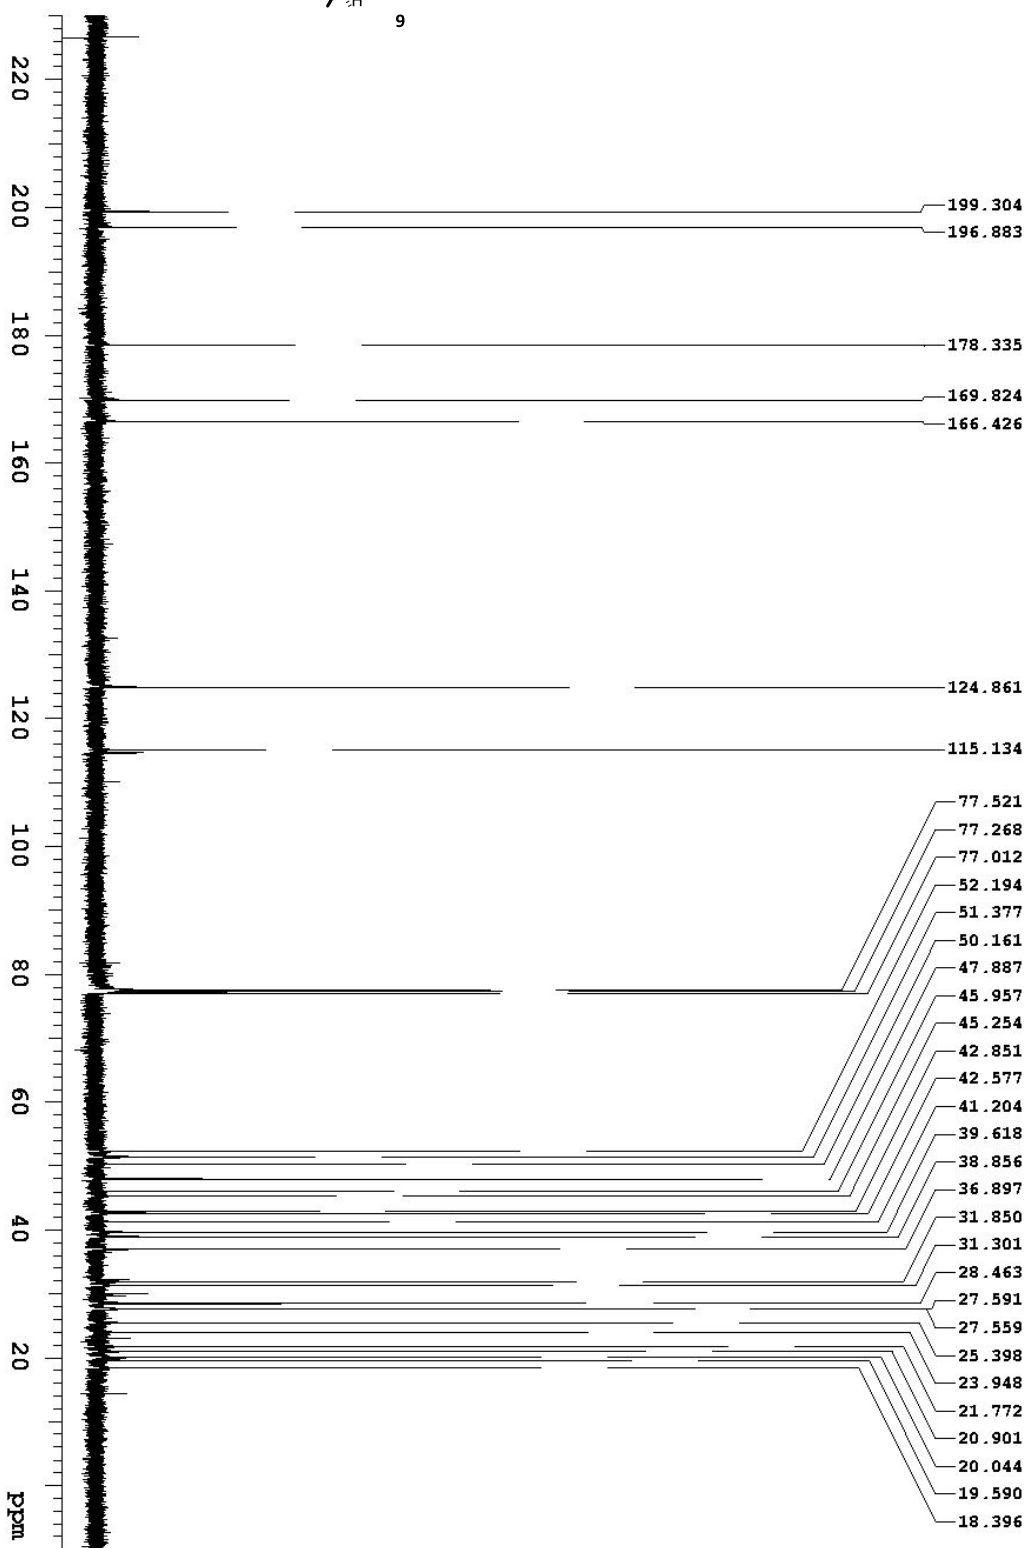

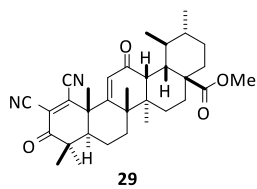

Standard Proton Parameters (500)

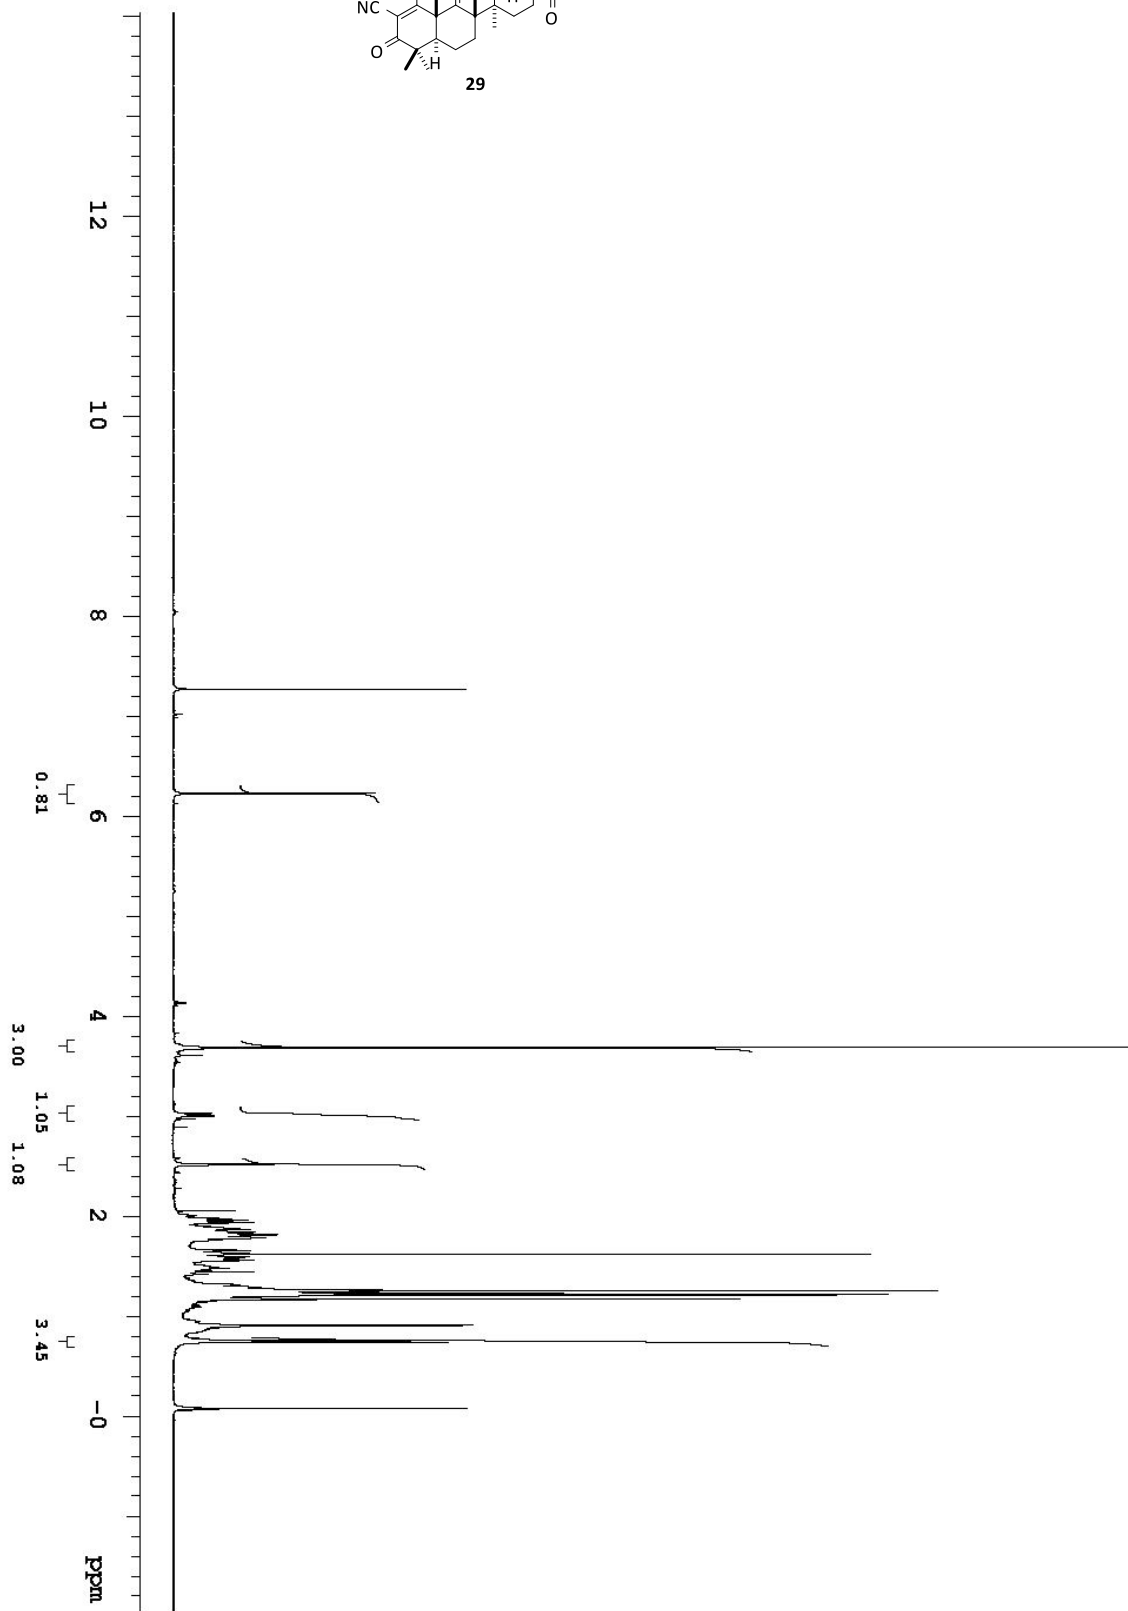

STANDARD CARBON PARAMETERS (500)

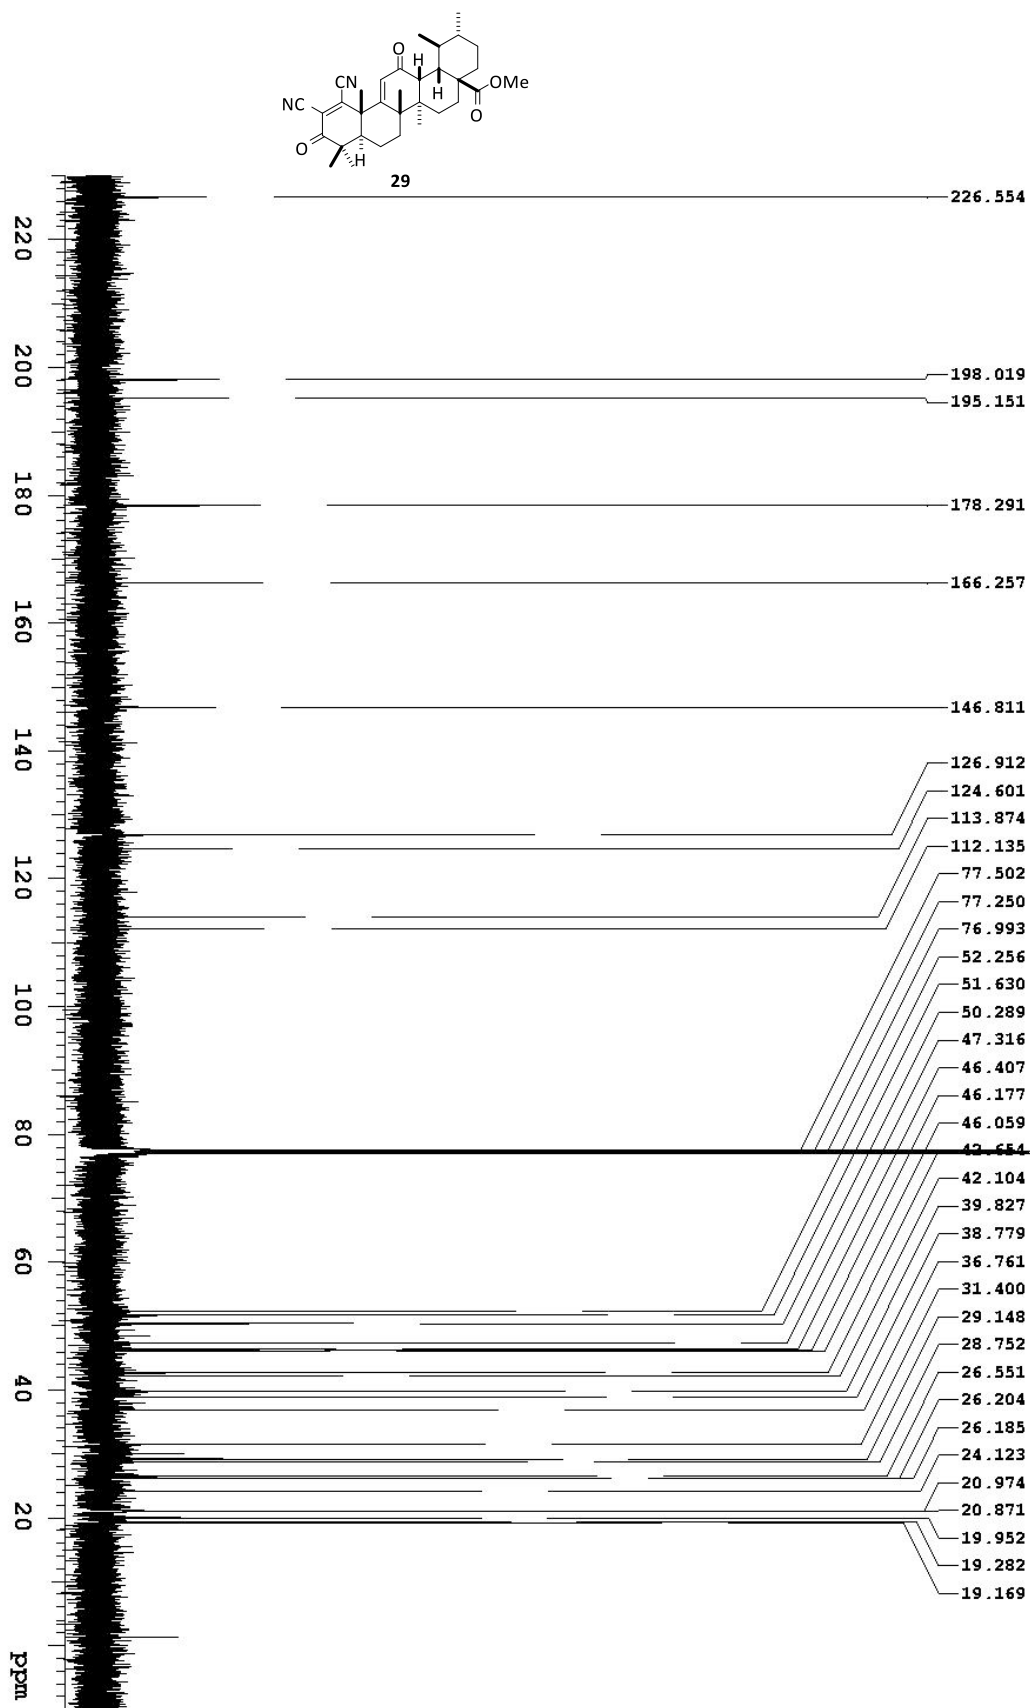

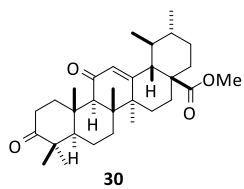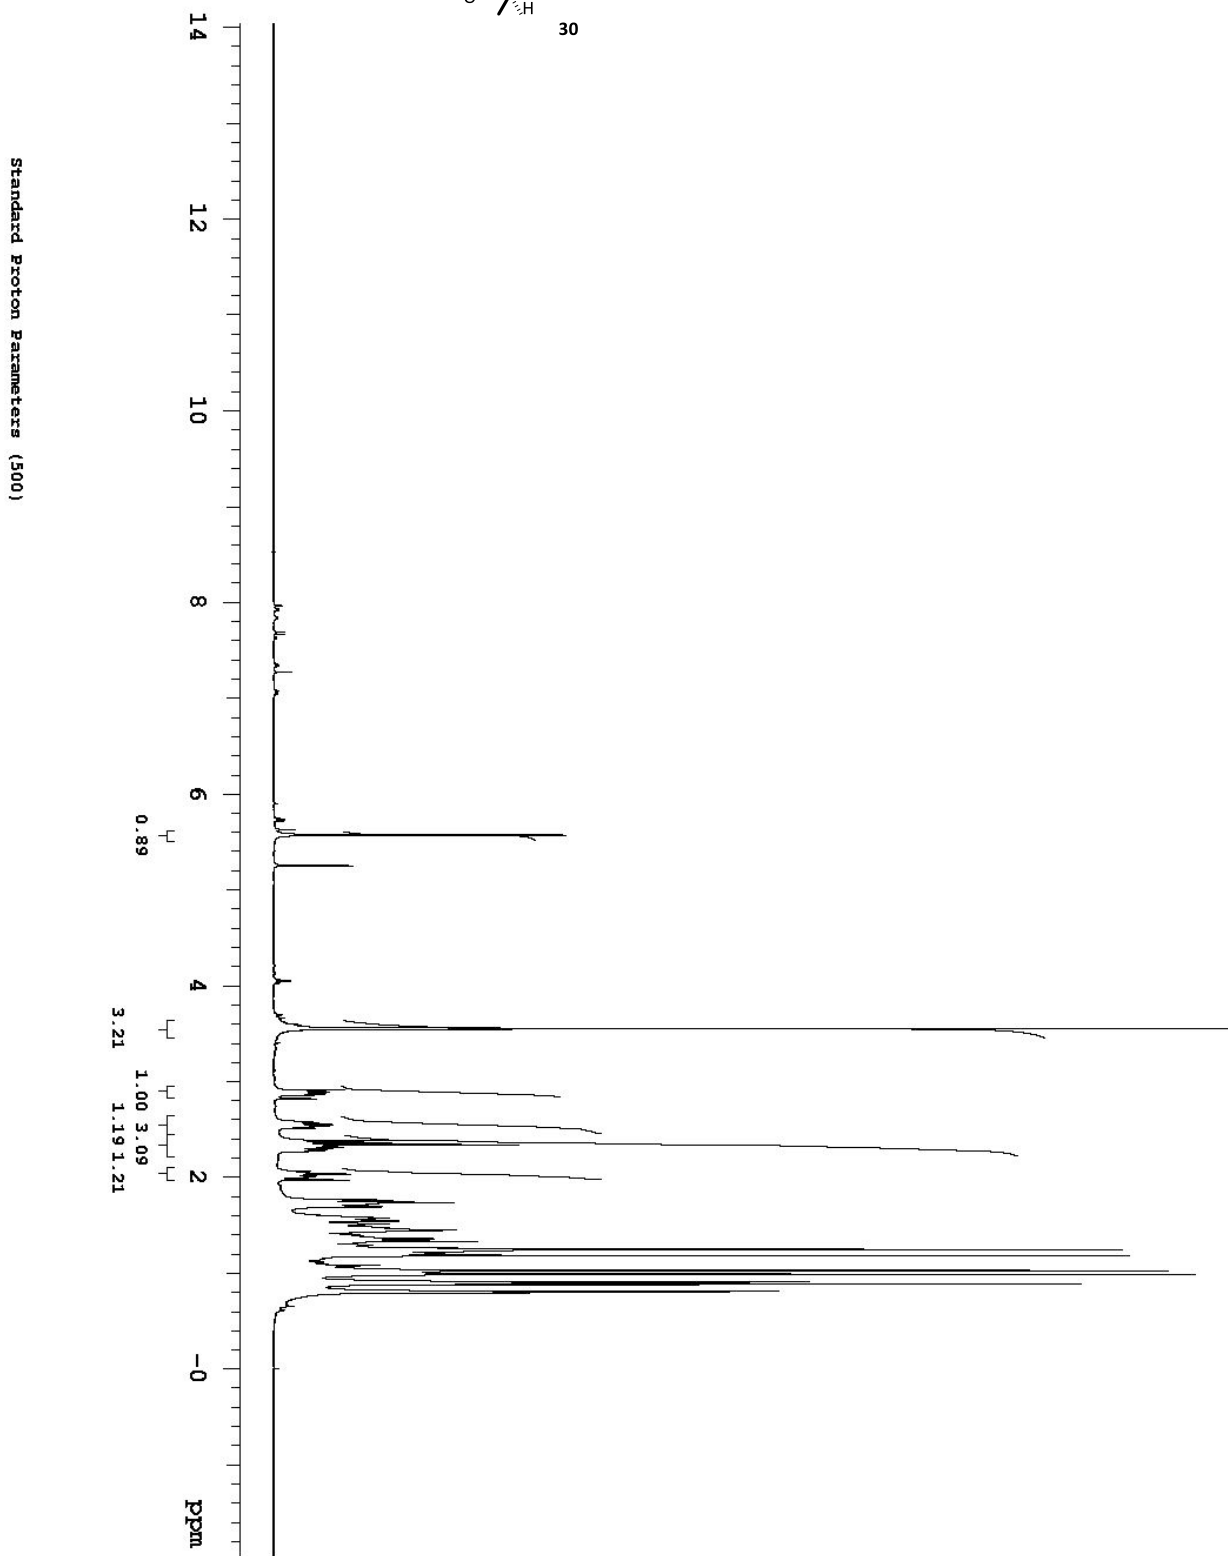



STANDARD CARBON PARAMETERS (500)

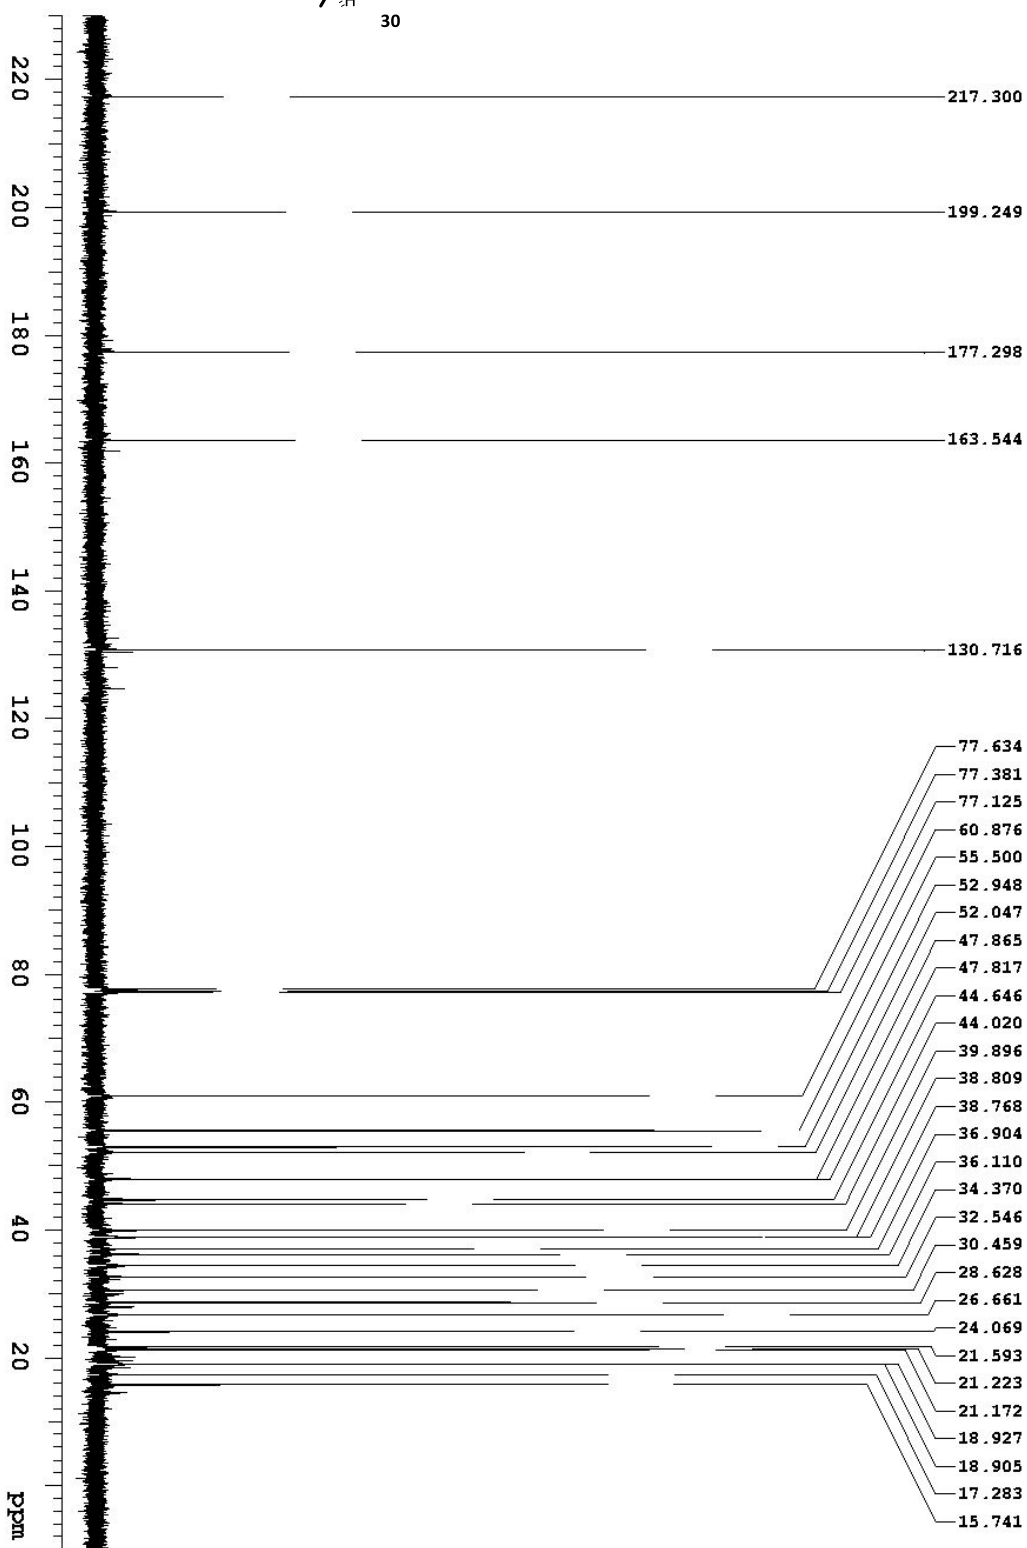



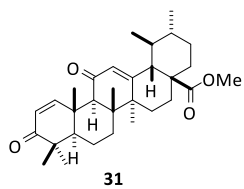

Standard Proton Parameters (500)

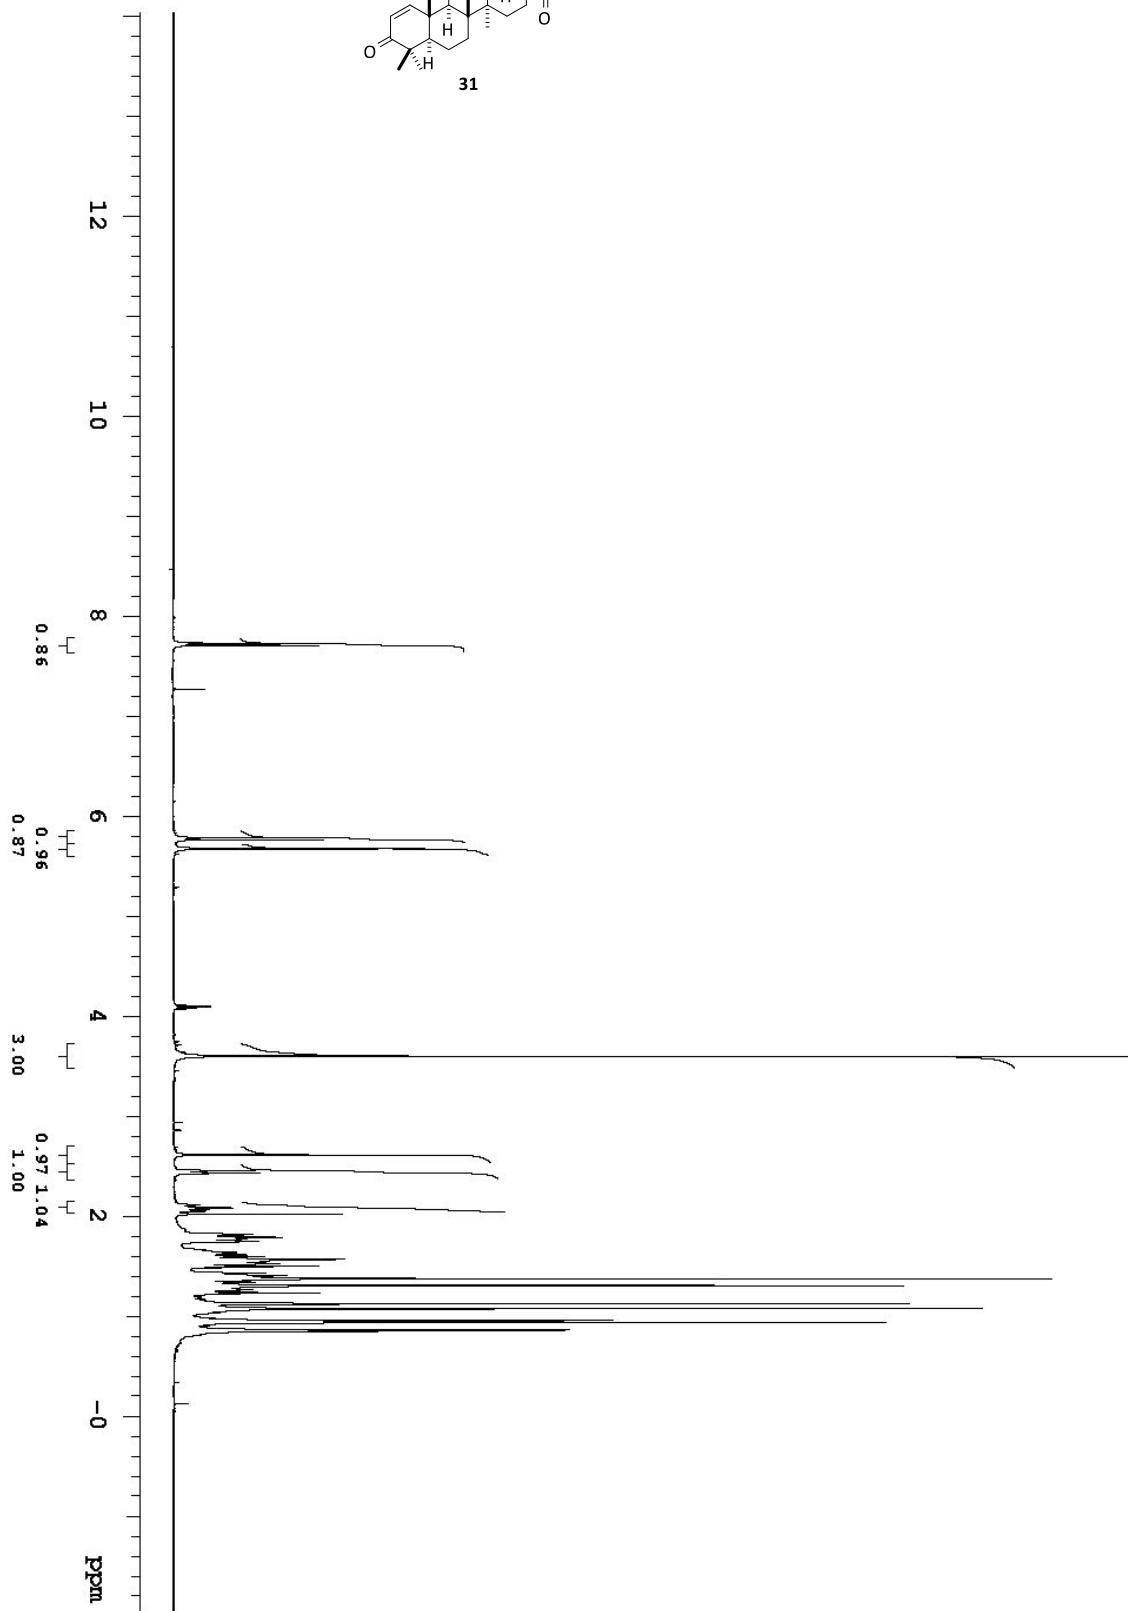

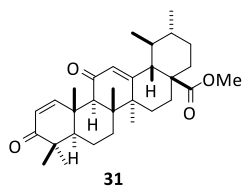

STANDARD CARBON PARAMETERS (500)

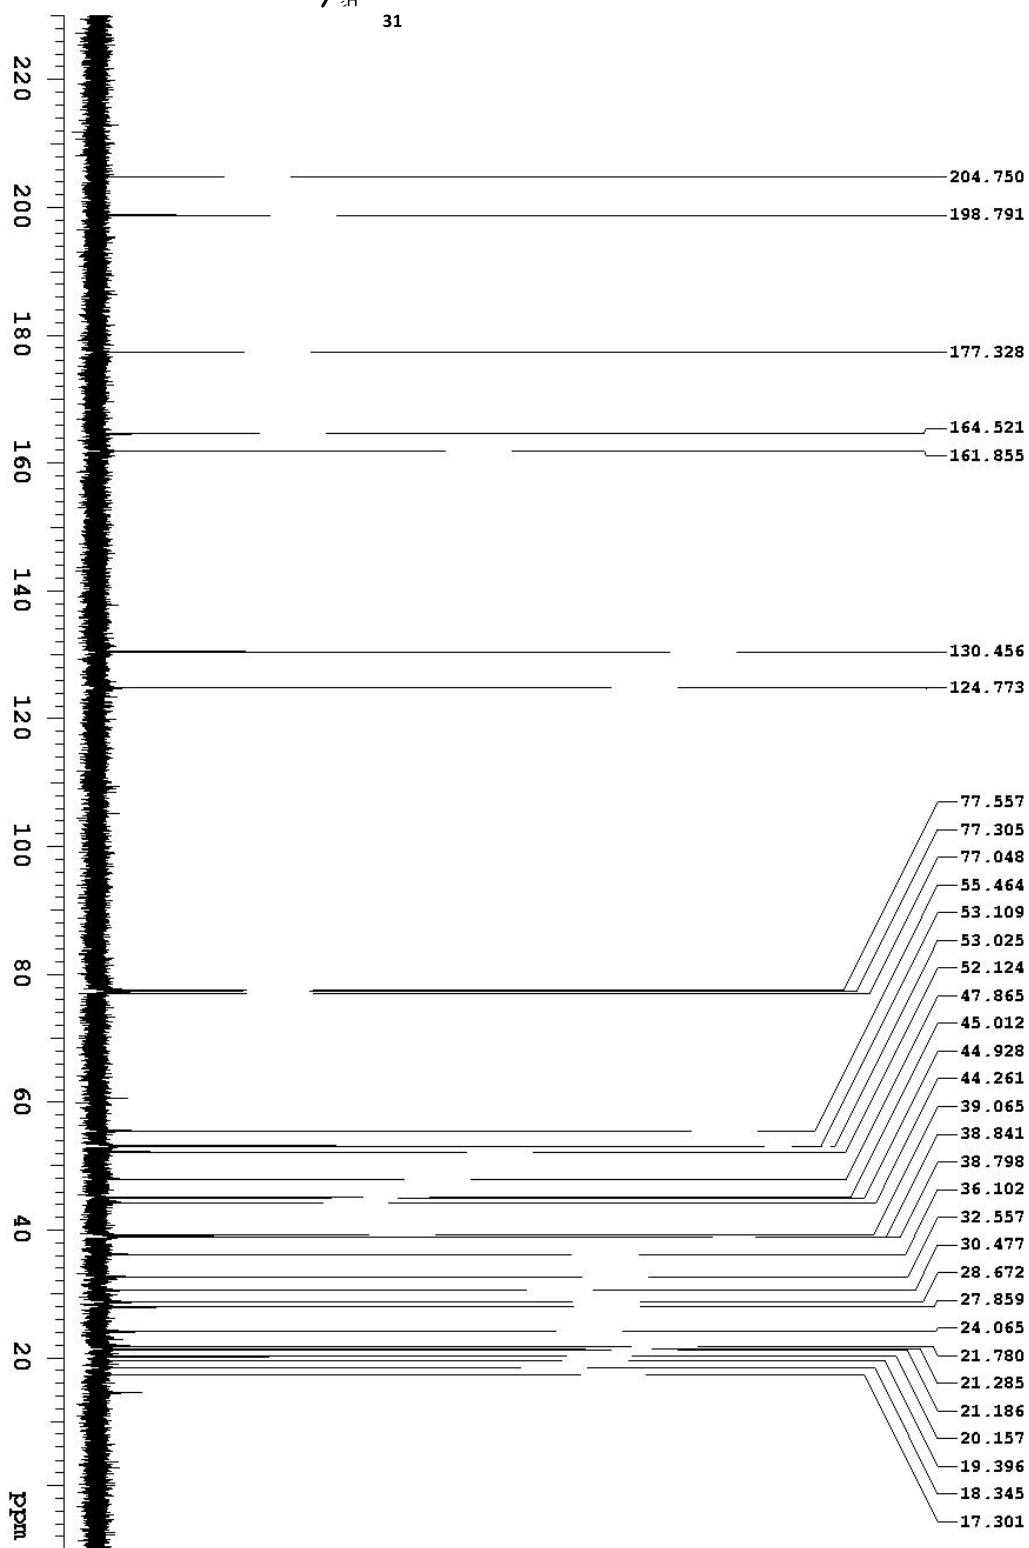

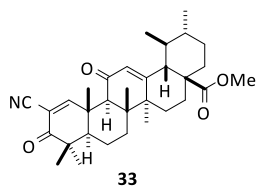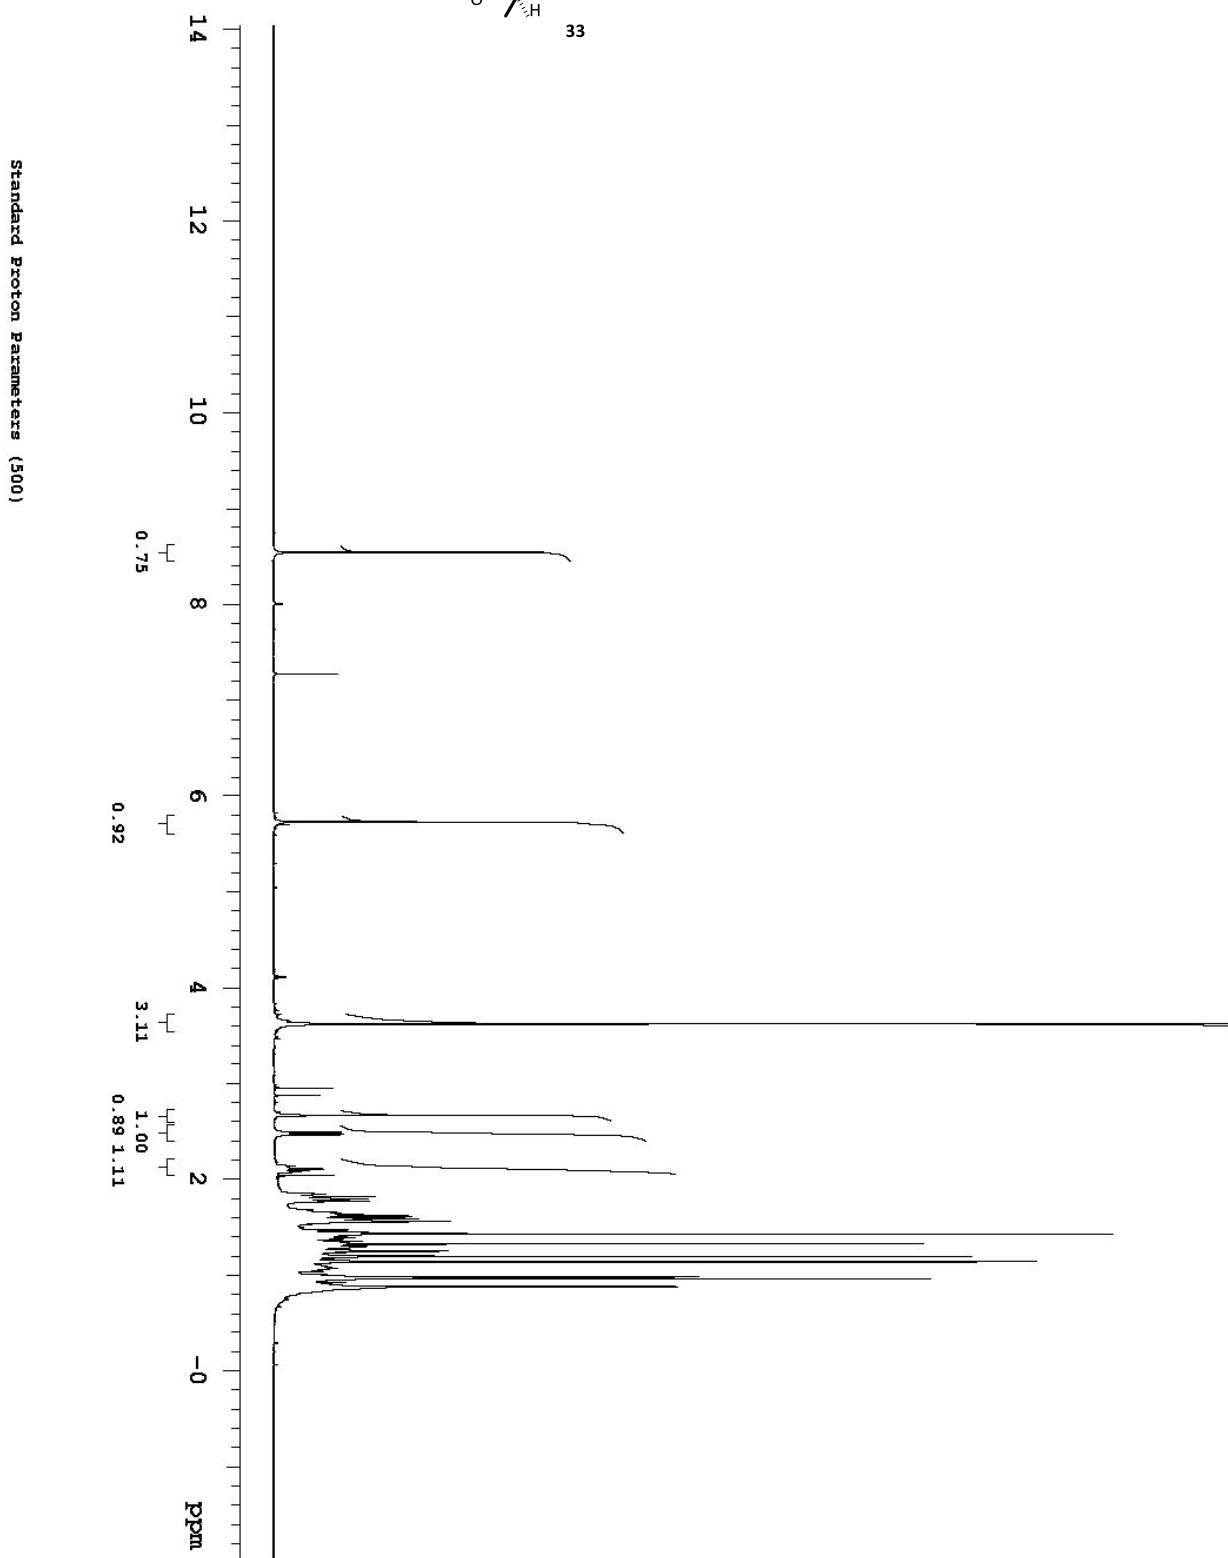

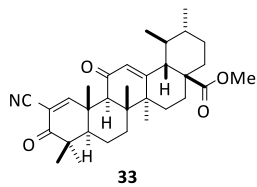

STANDARD CARBON PARAMETERS (500)

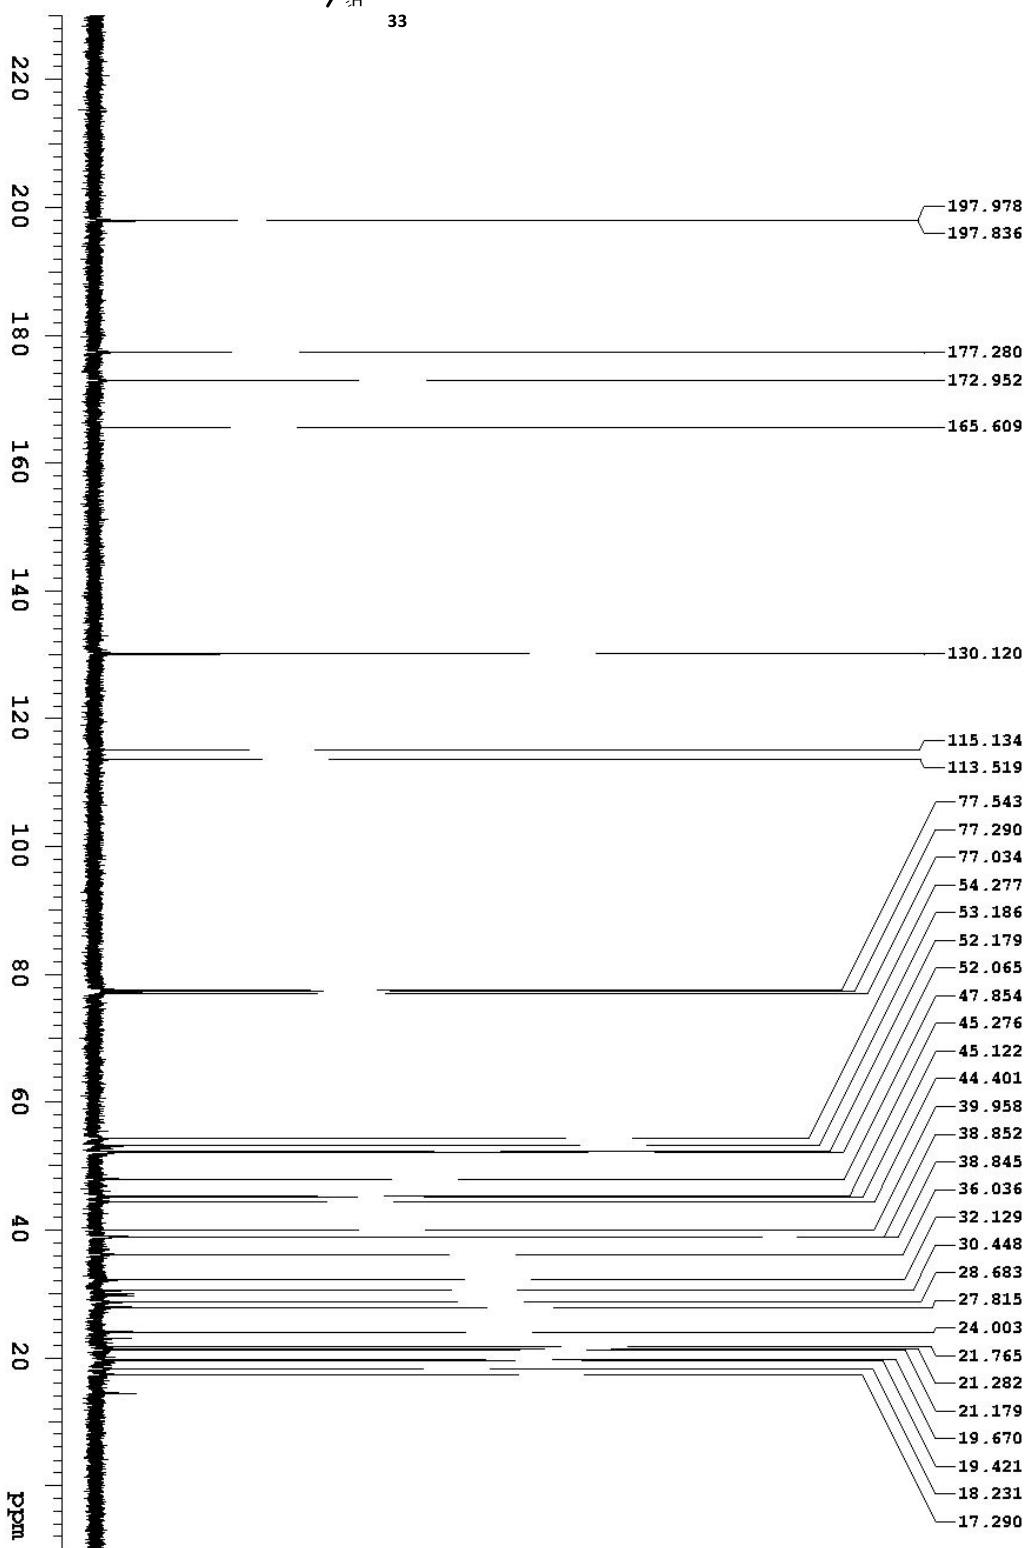

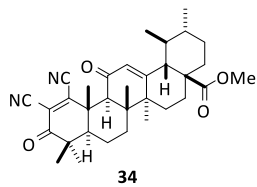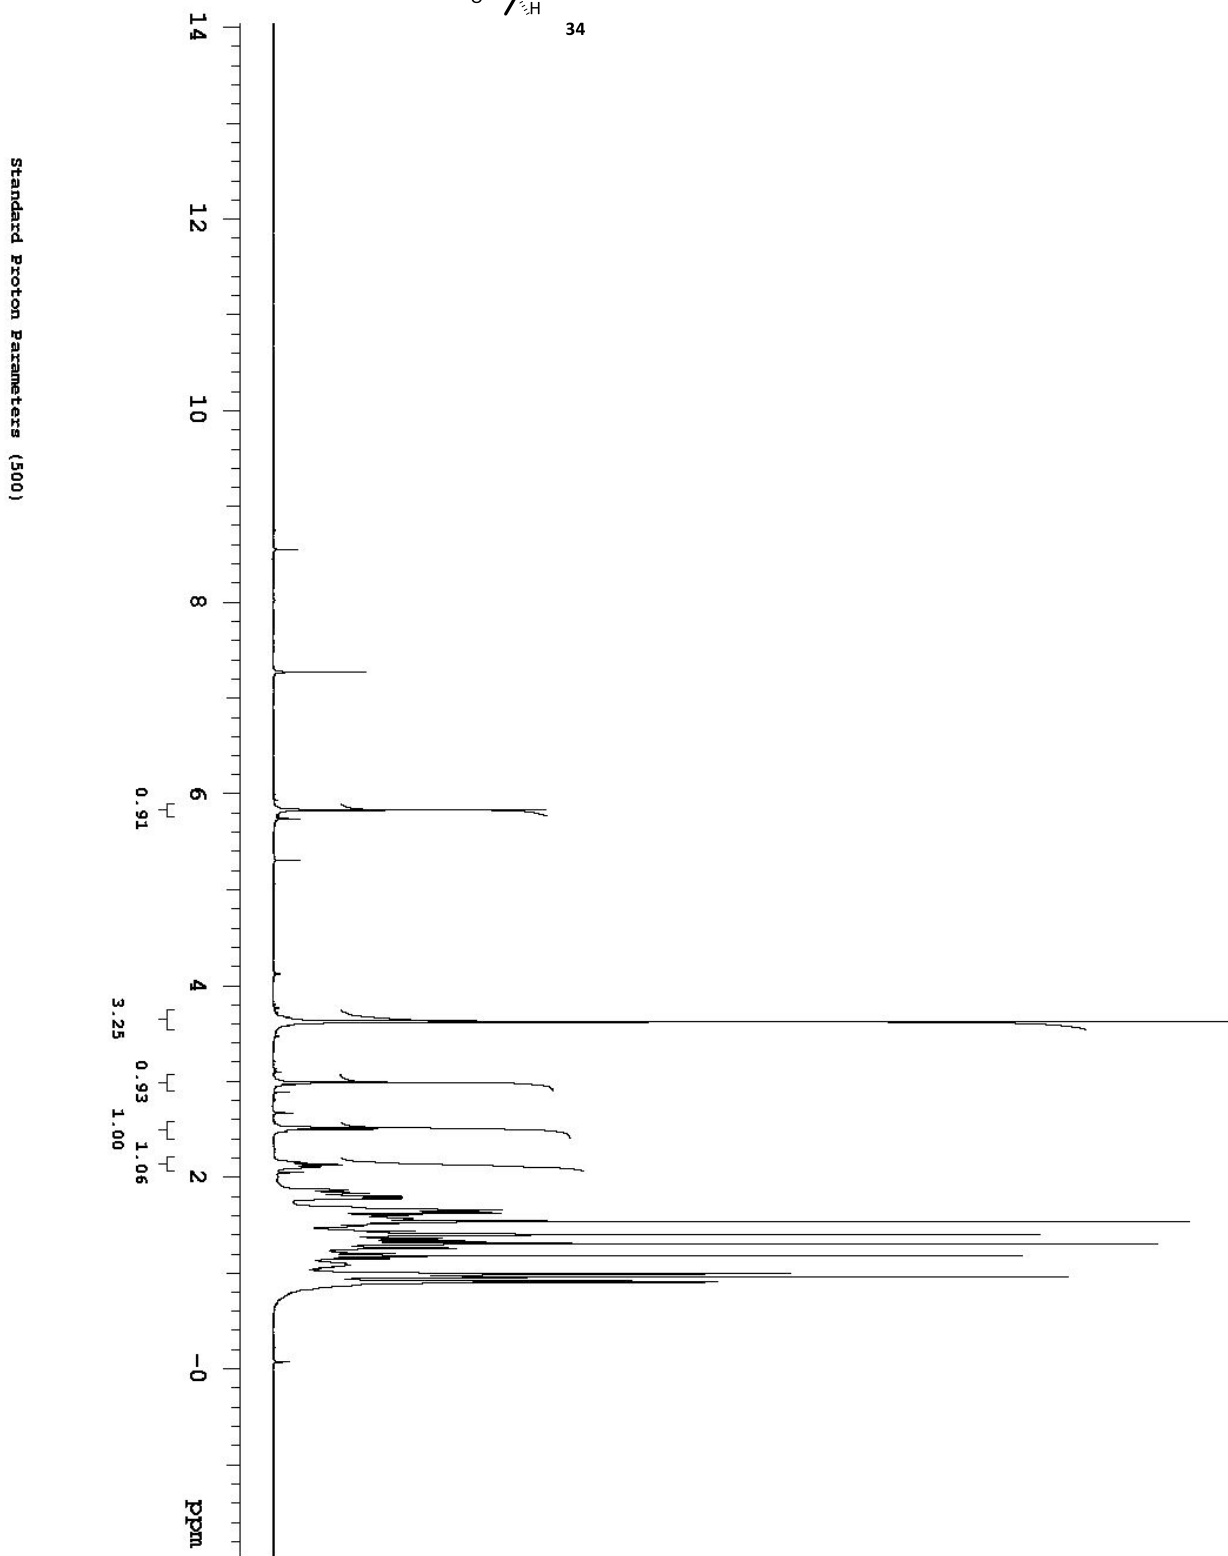



STANDARD CARBON PARAMETERS (500)

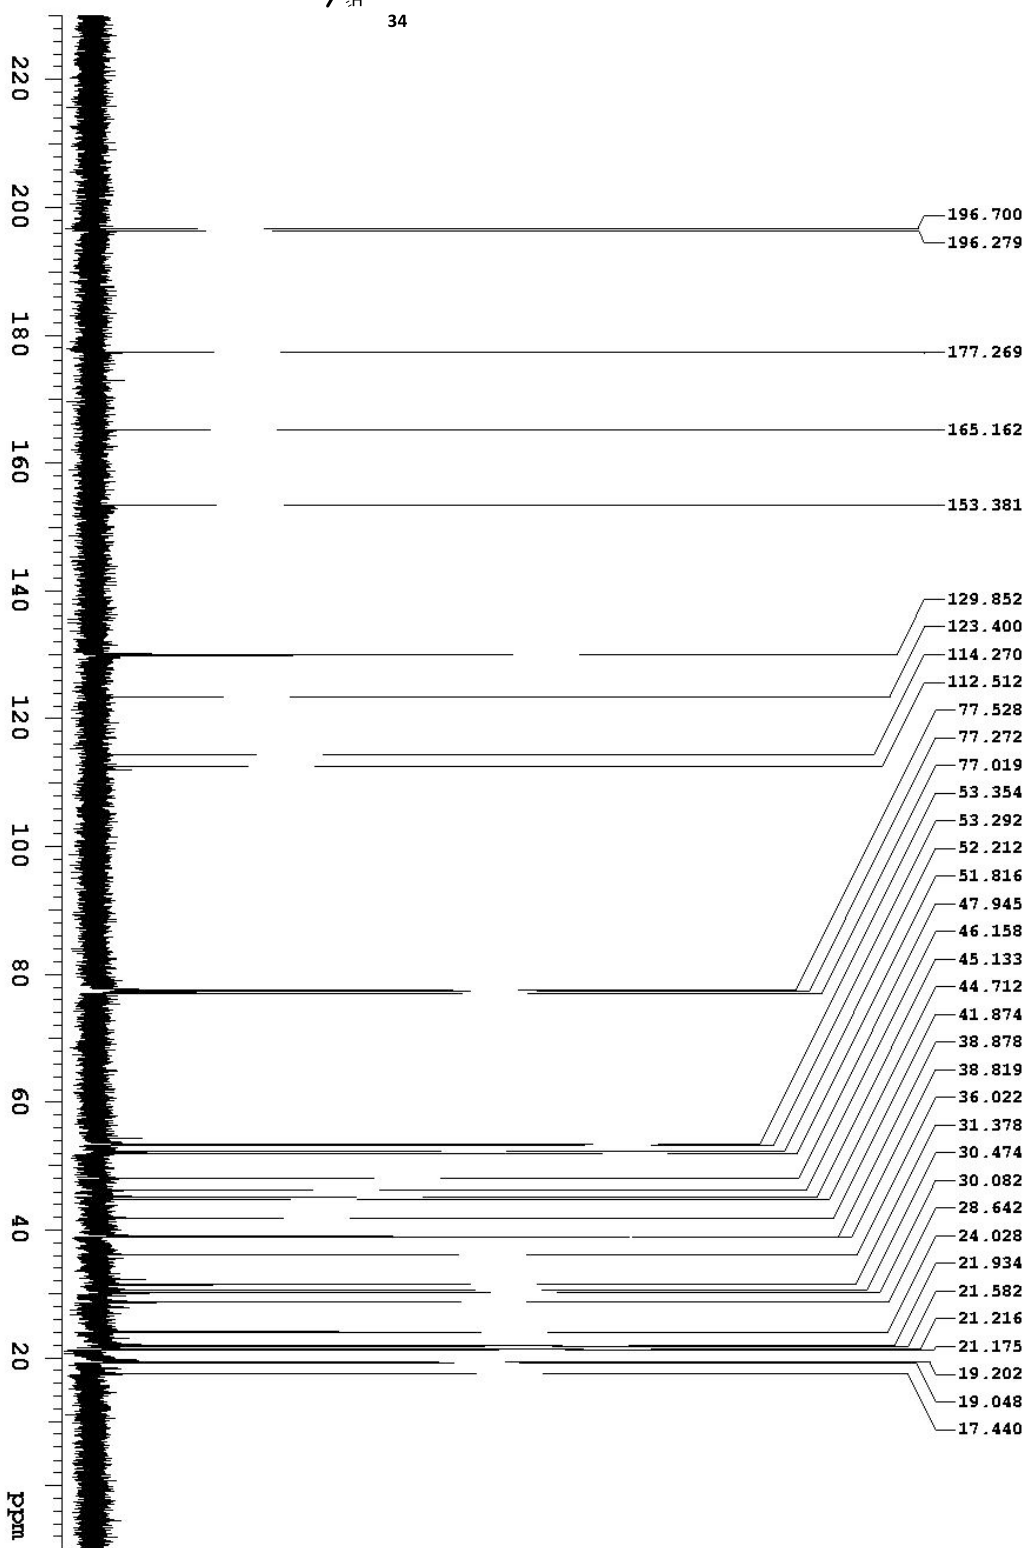

20ppm Window PROTON PARAMETERS (500)

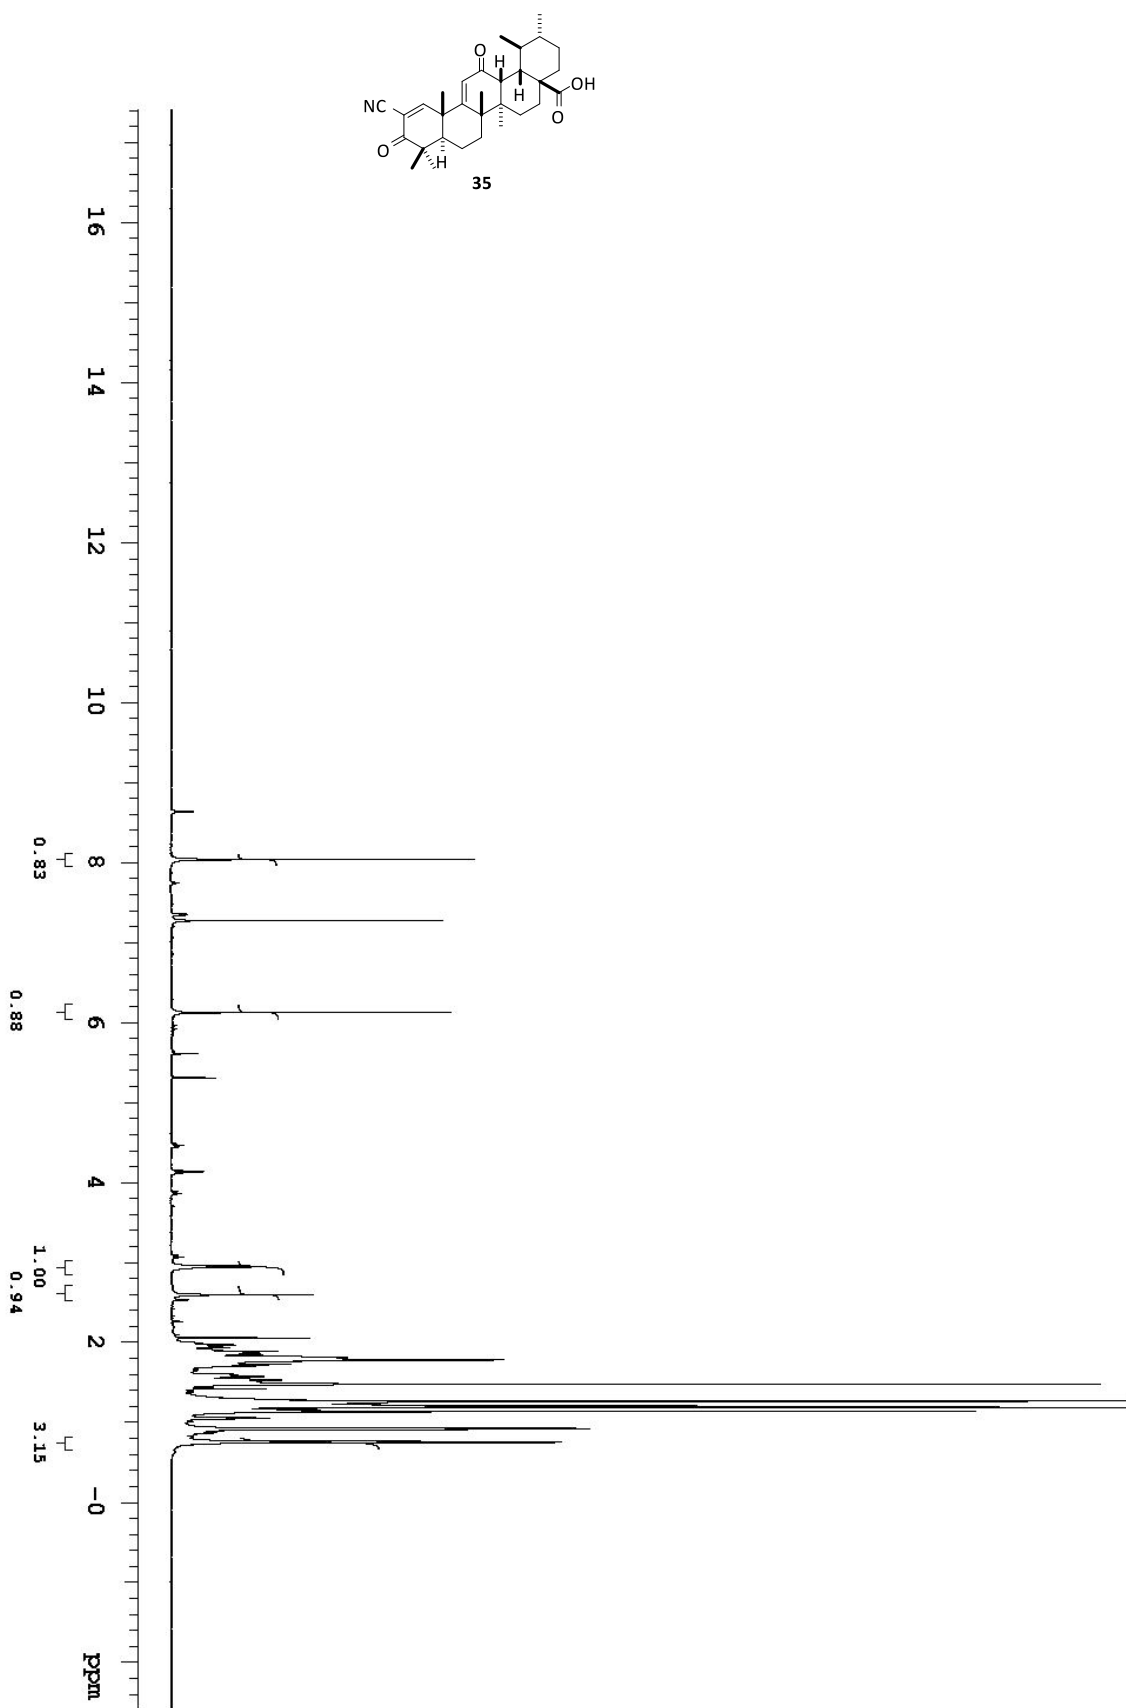



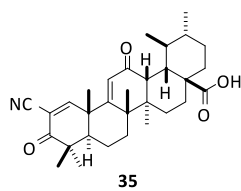

STANDARD CARBON PARAMETERS (500)

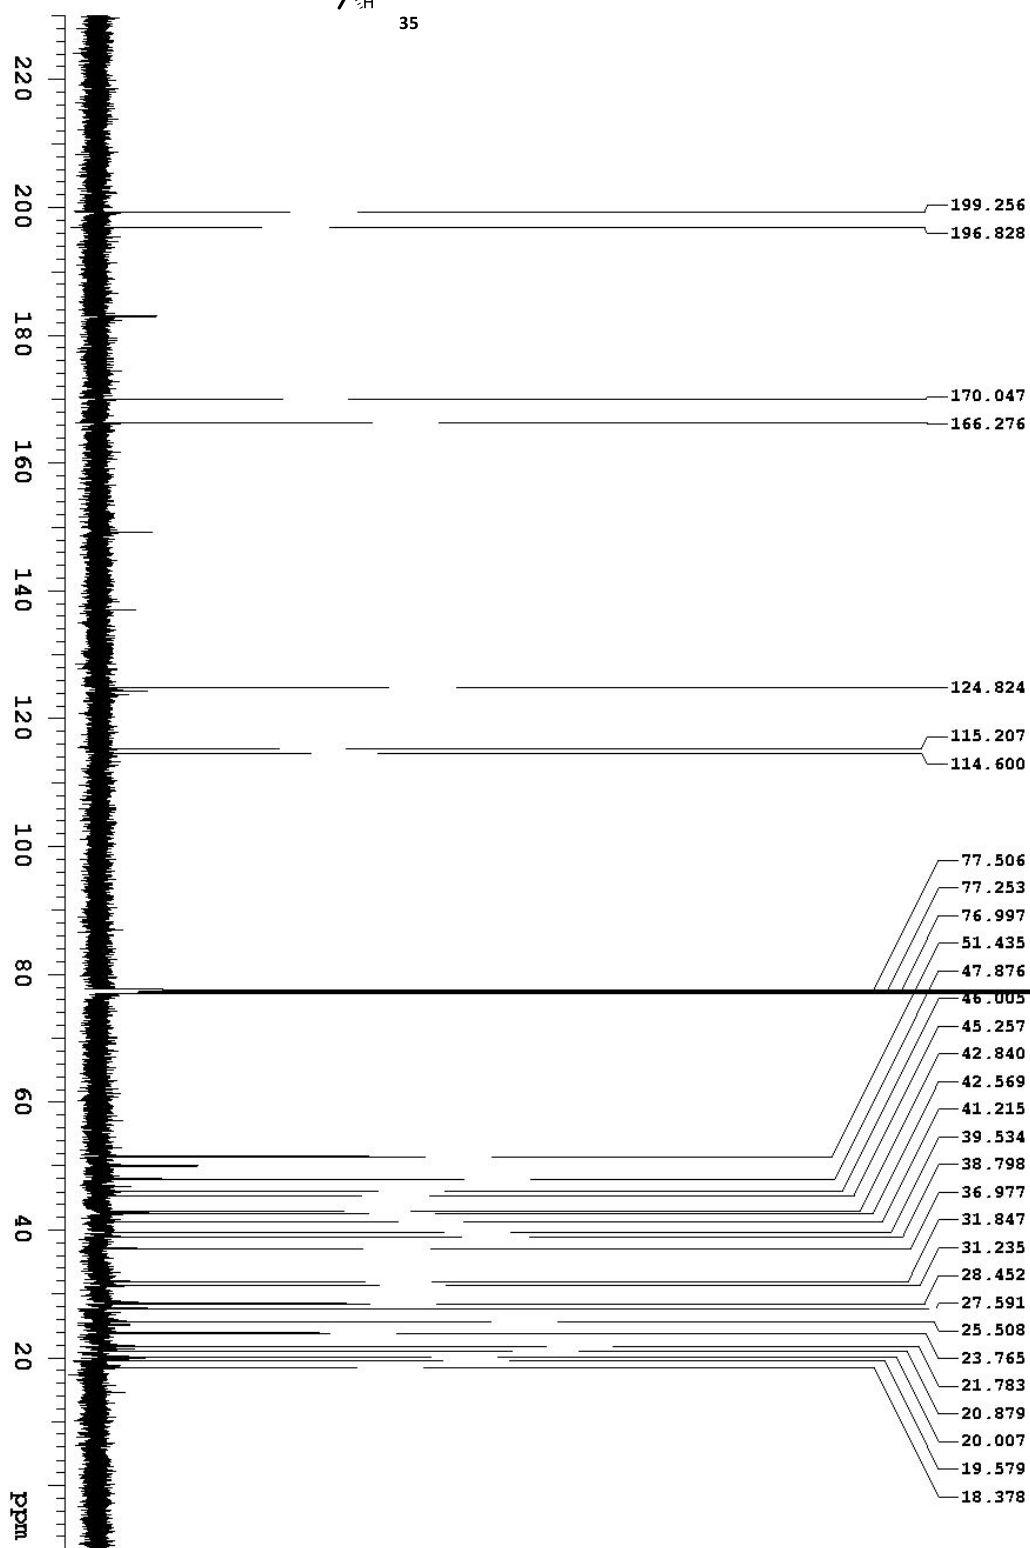

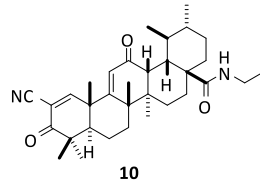

Standard Proton Parameters (500)

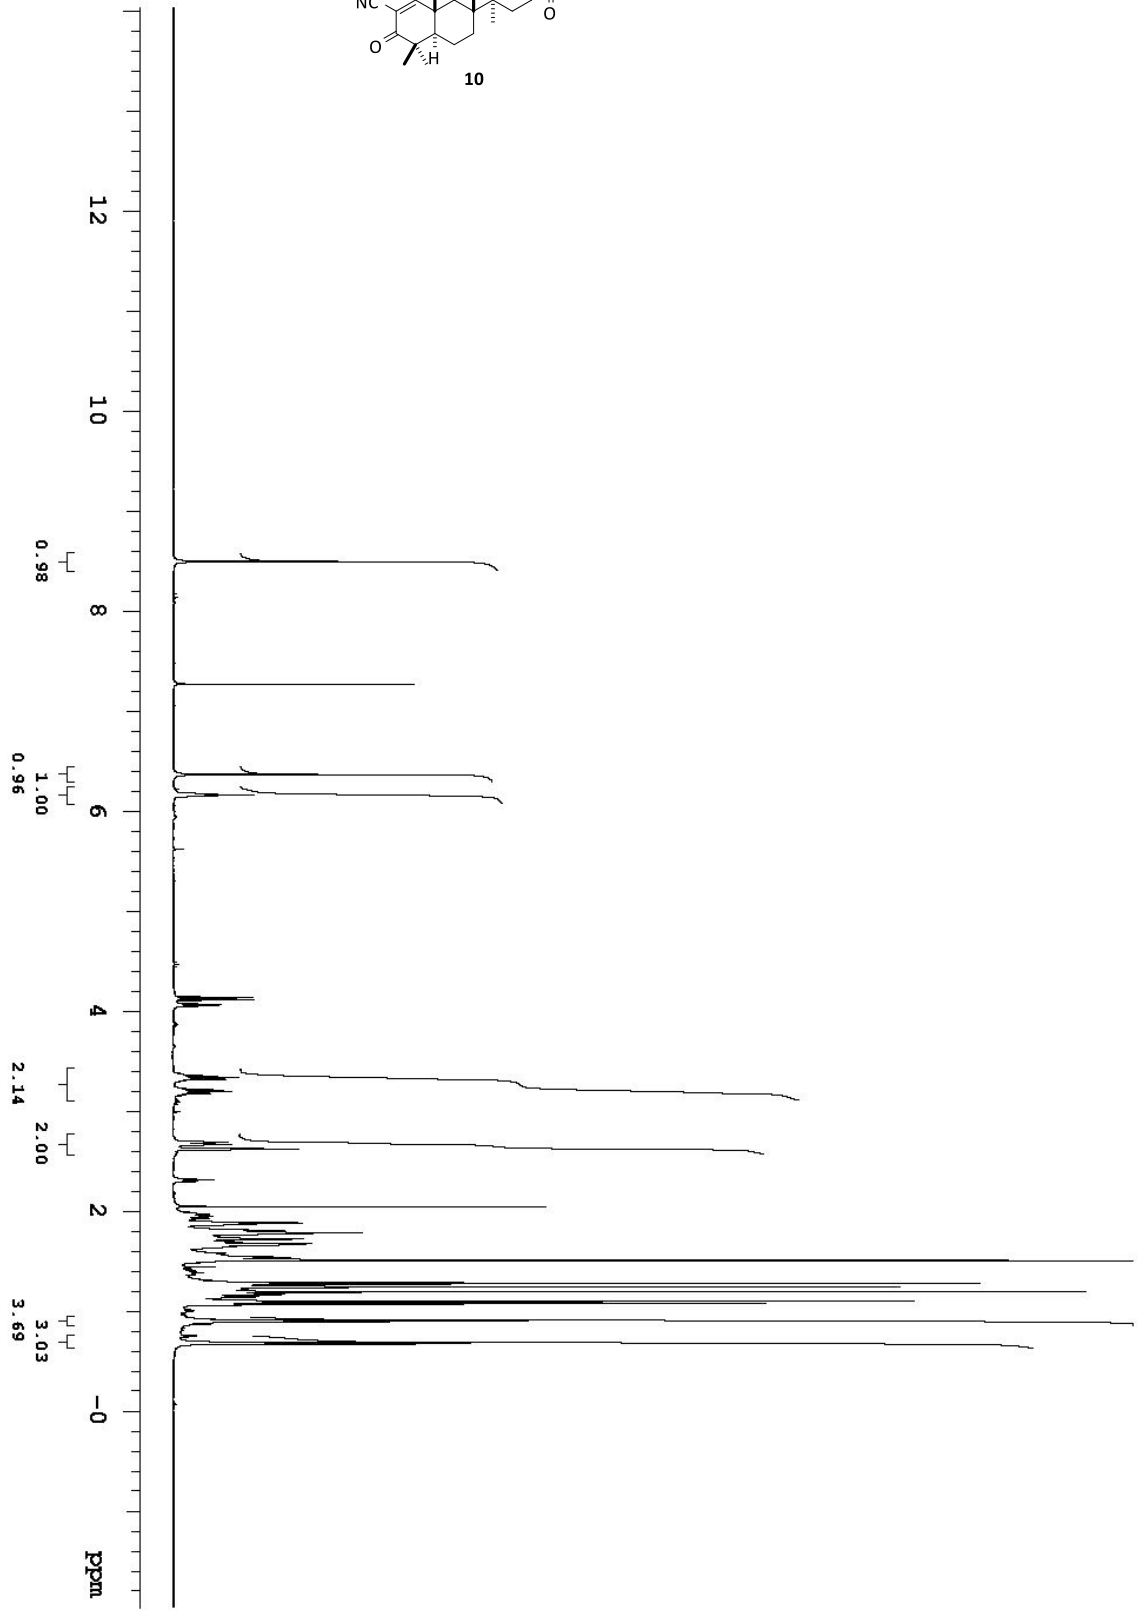

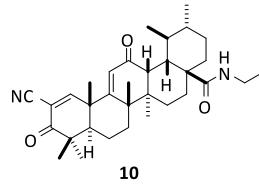

STANDARD CARBON PARAMETERS (500)

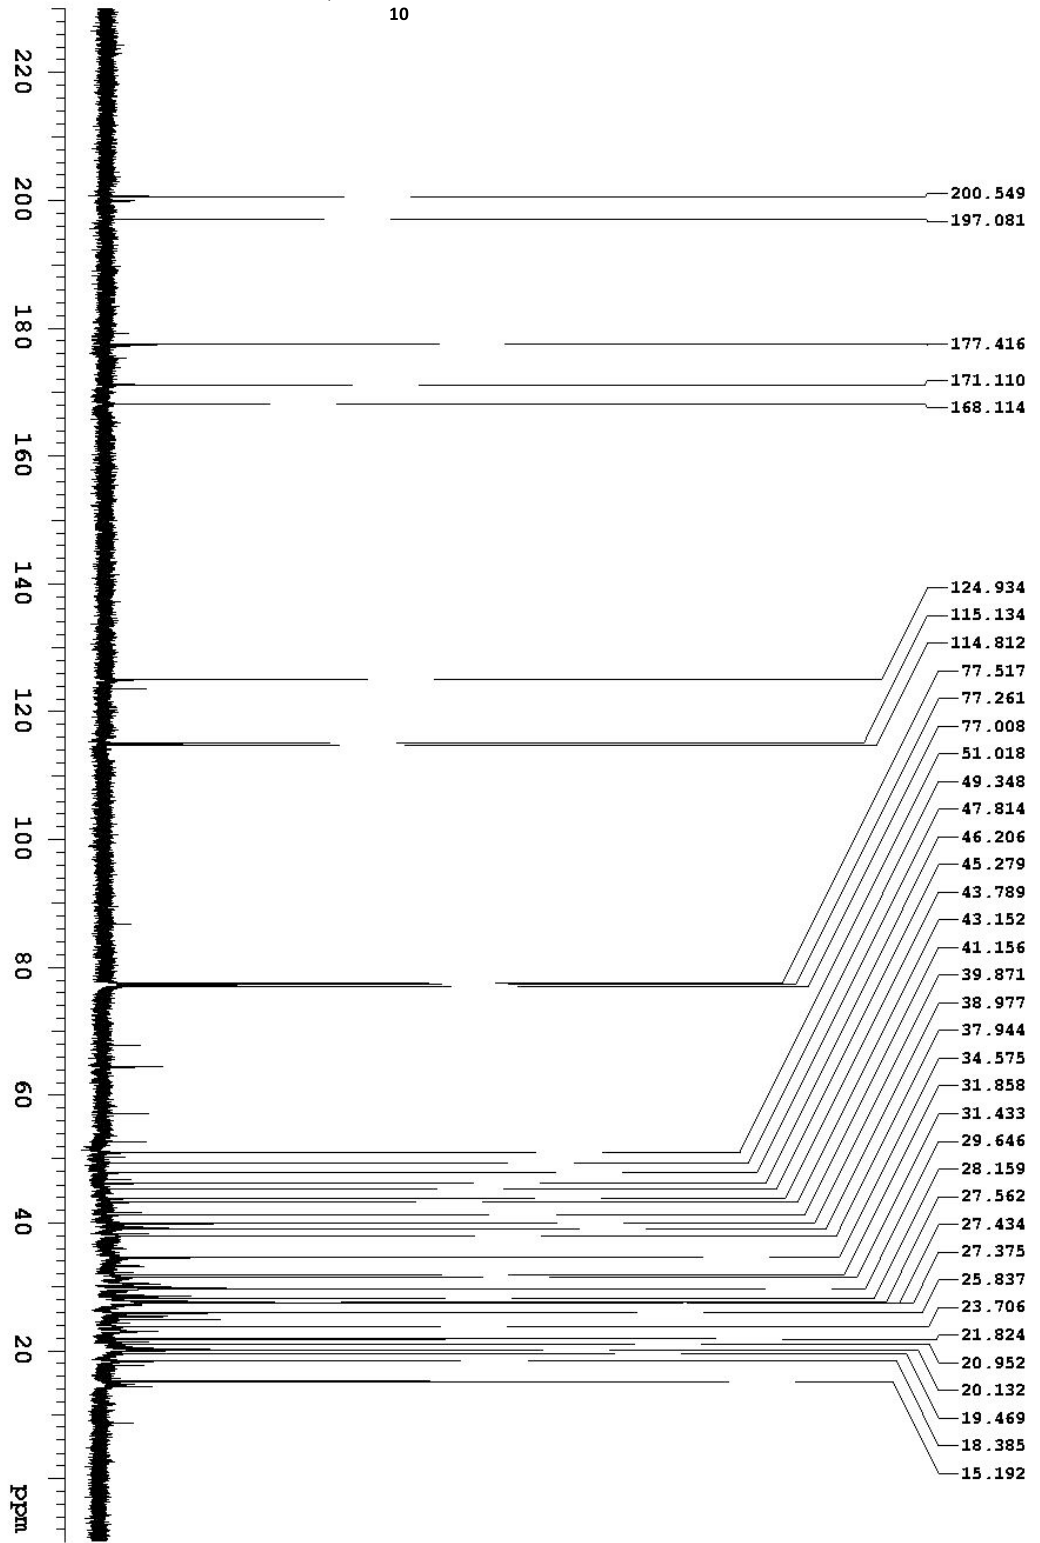

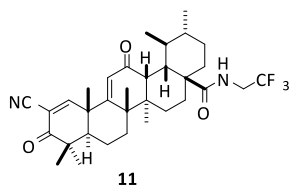

Standard Proton Parameters (500)

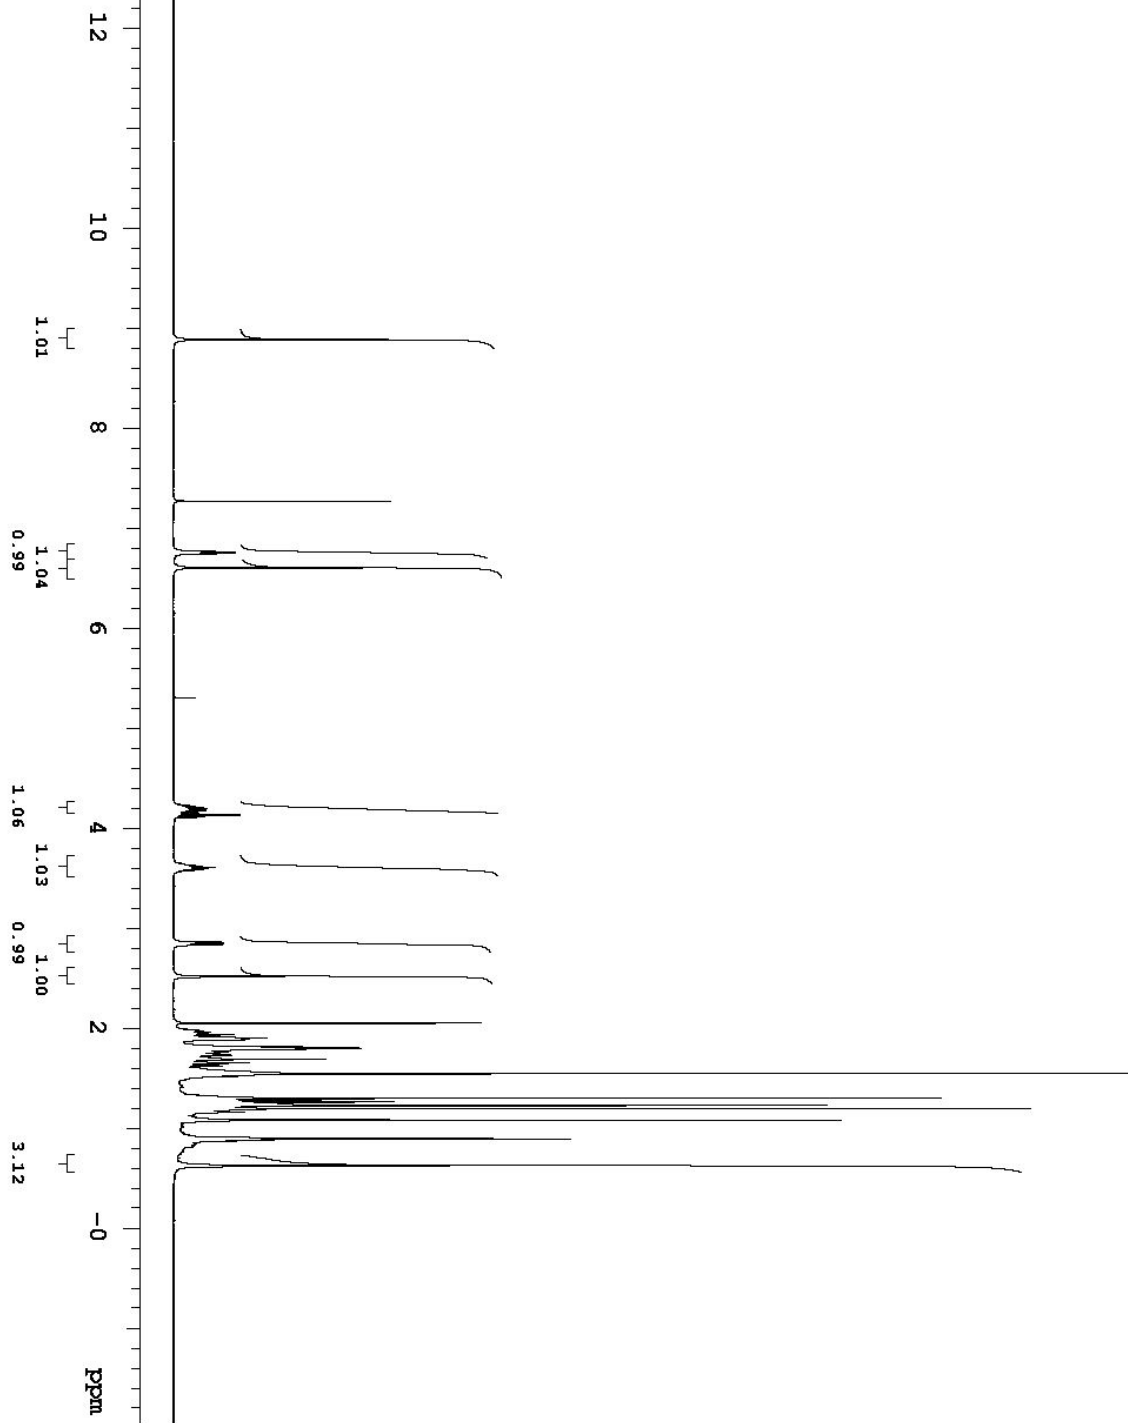



STANDARD CARBON PARAMETERS (500)

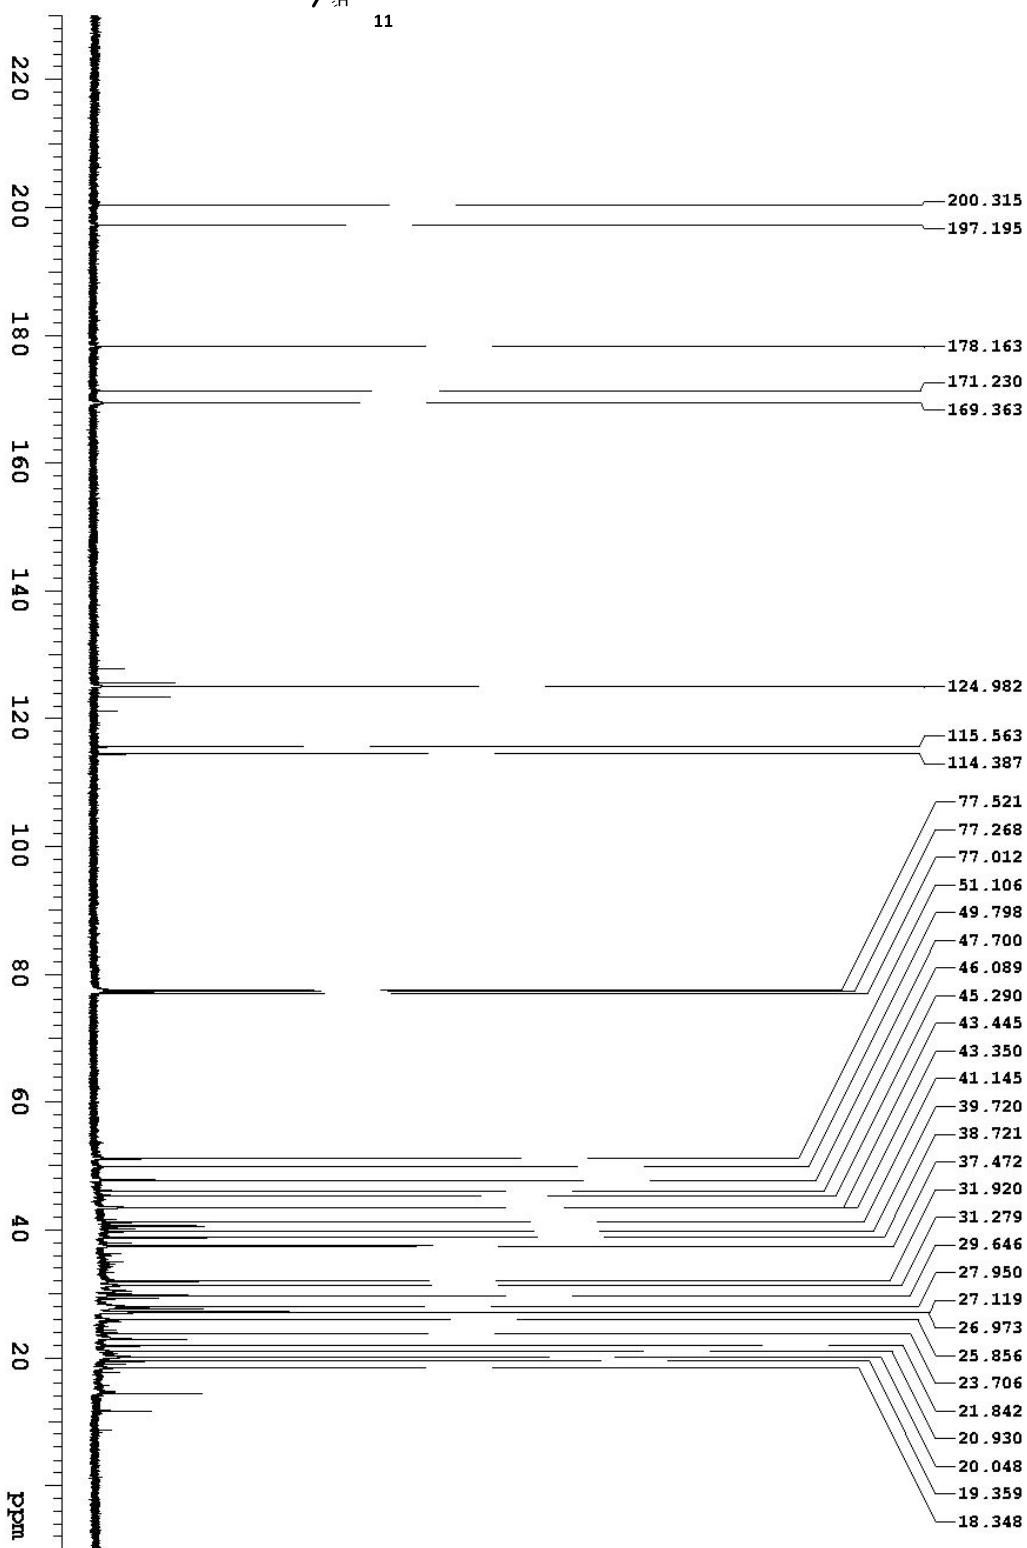

Standard F19 Parameters (500)

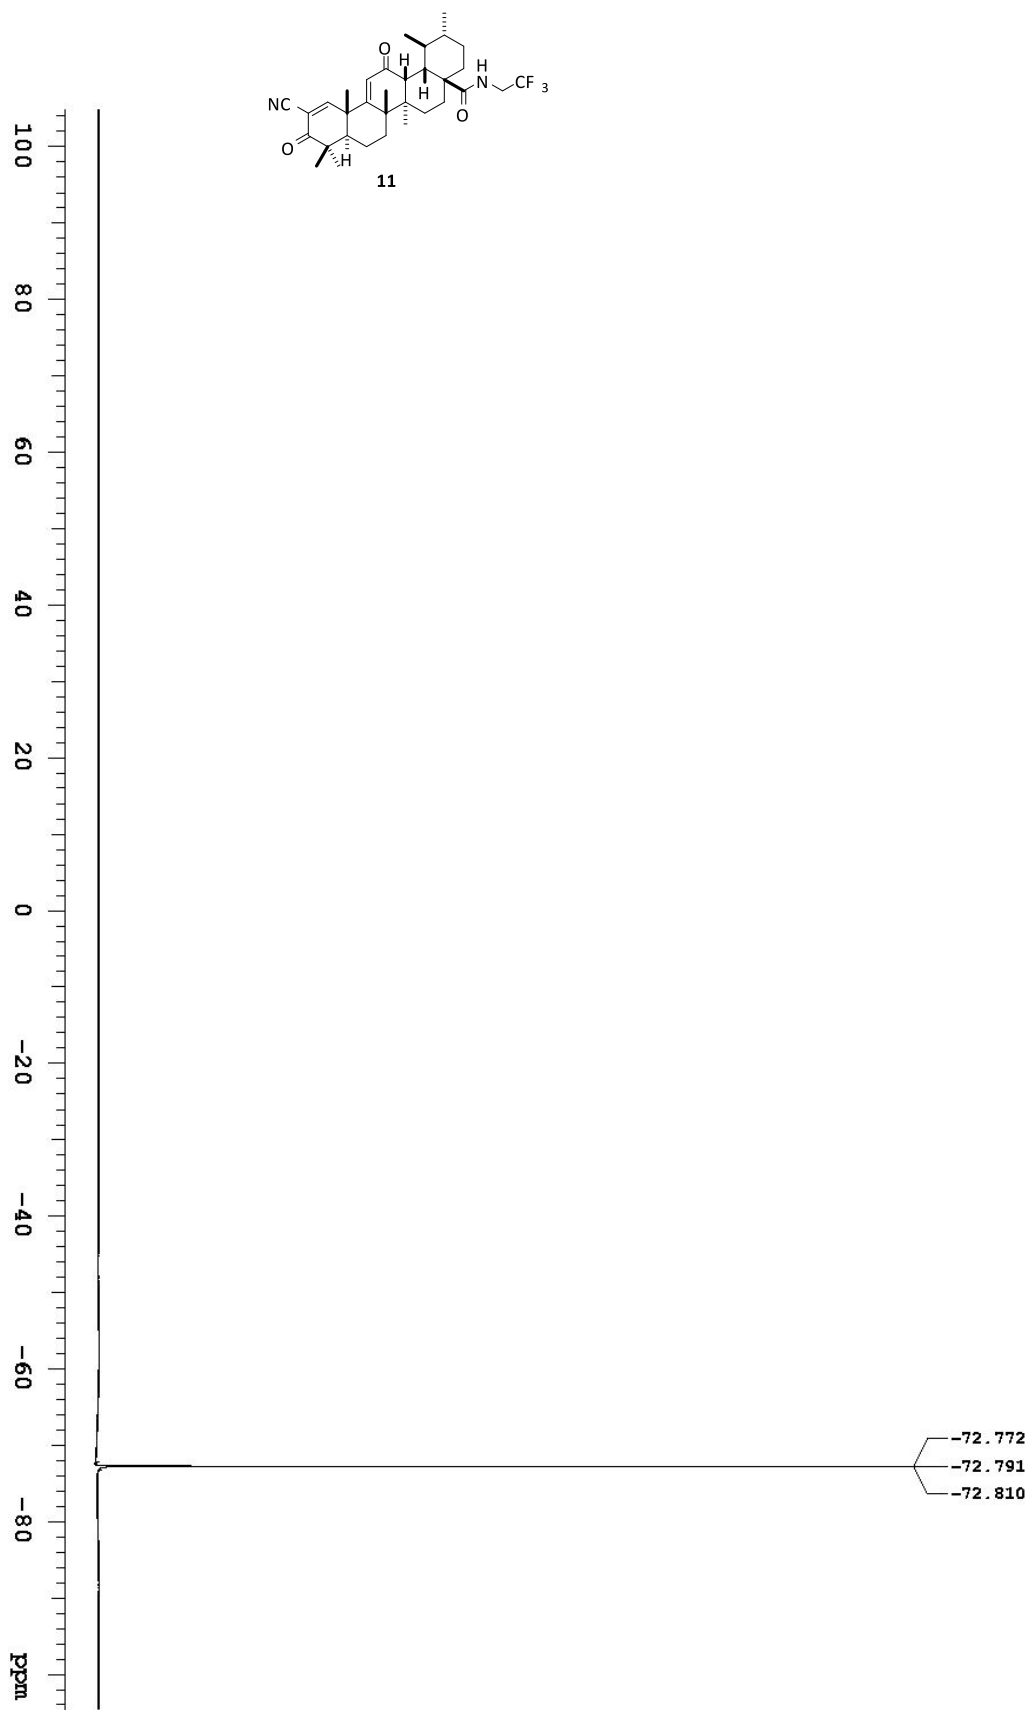

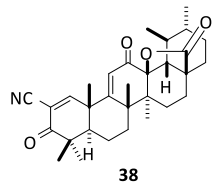

Standard Proton Parameters (500)

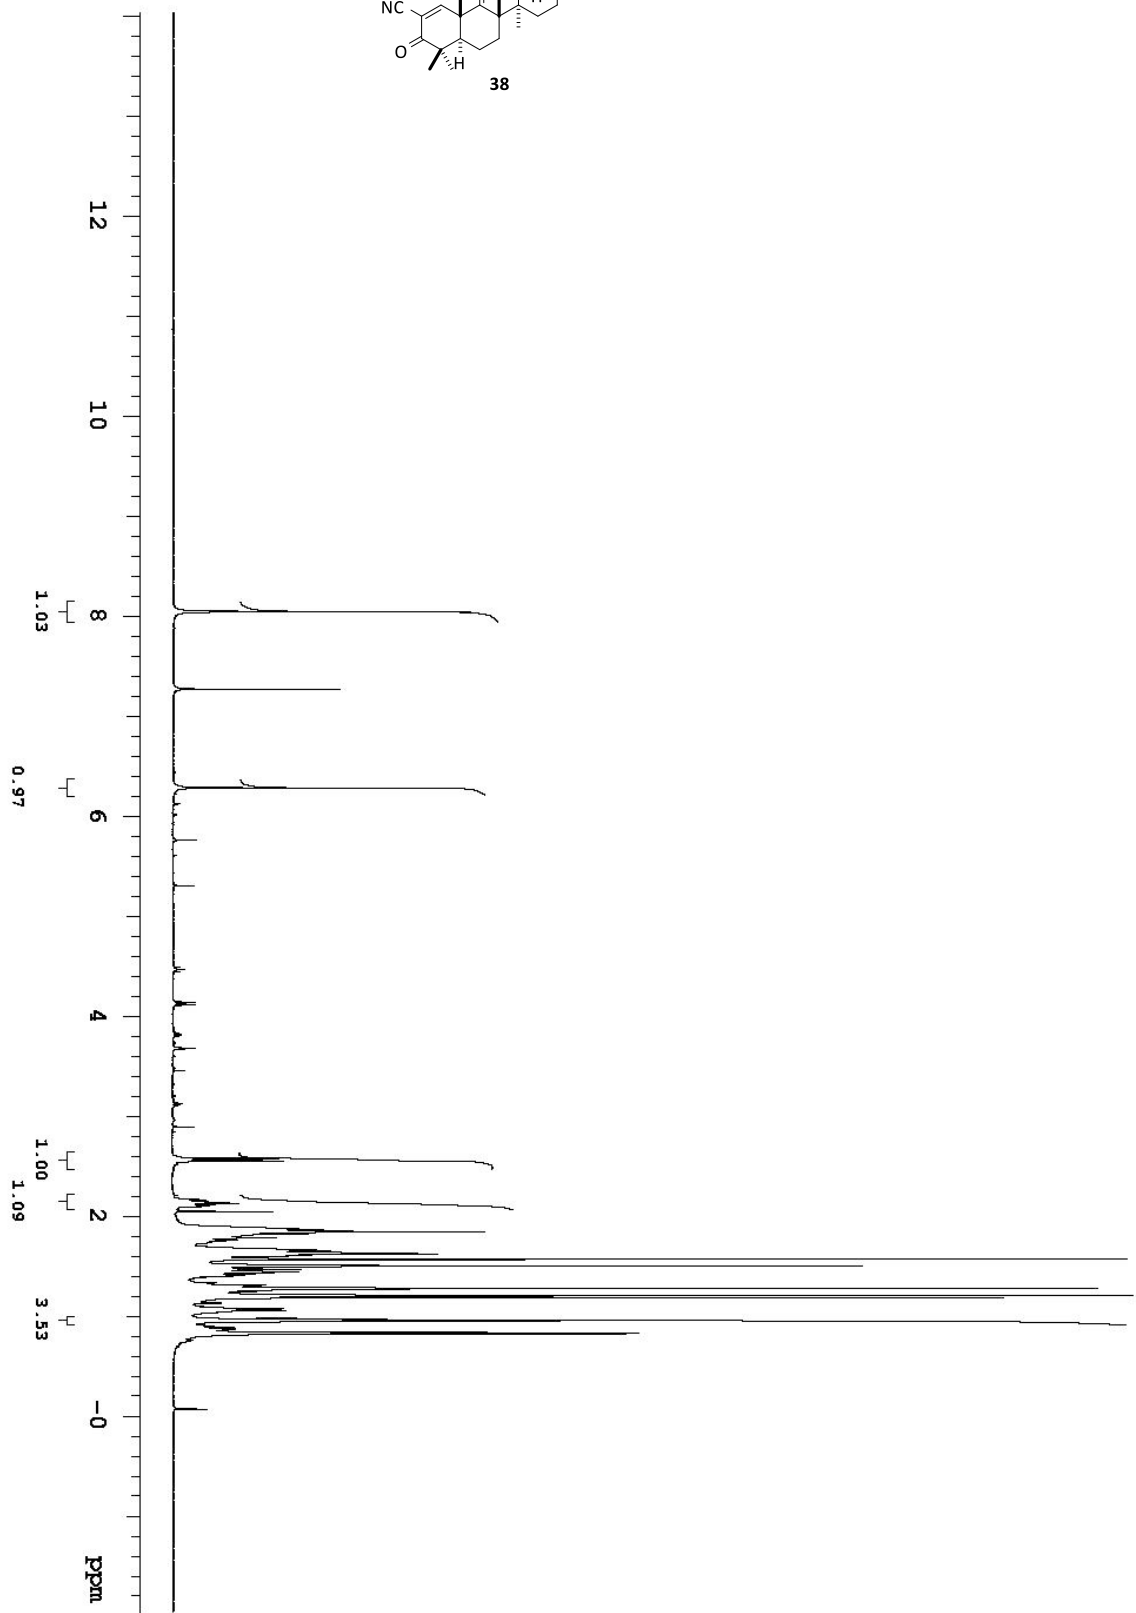

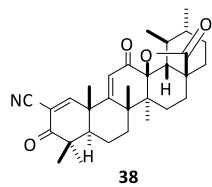

STANDARD CARBON PARAMETERS (500)

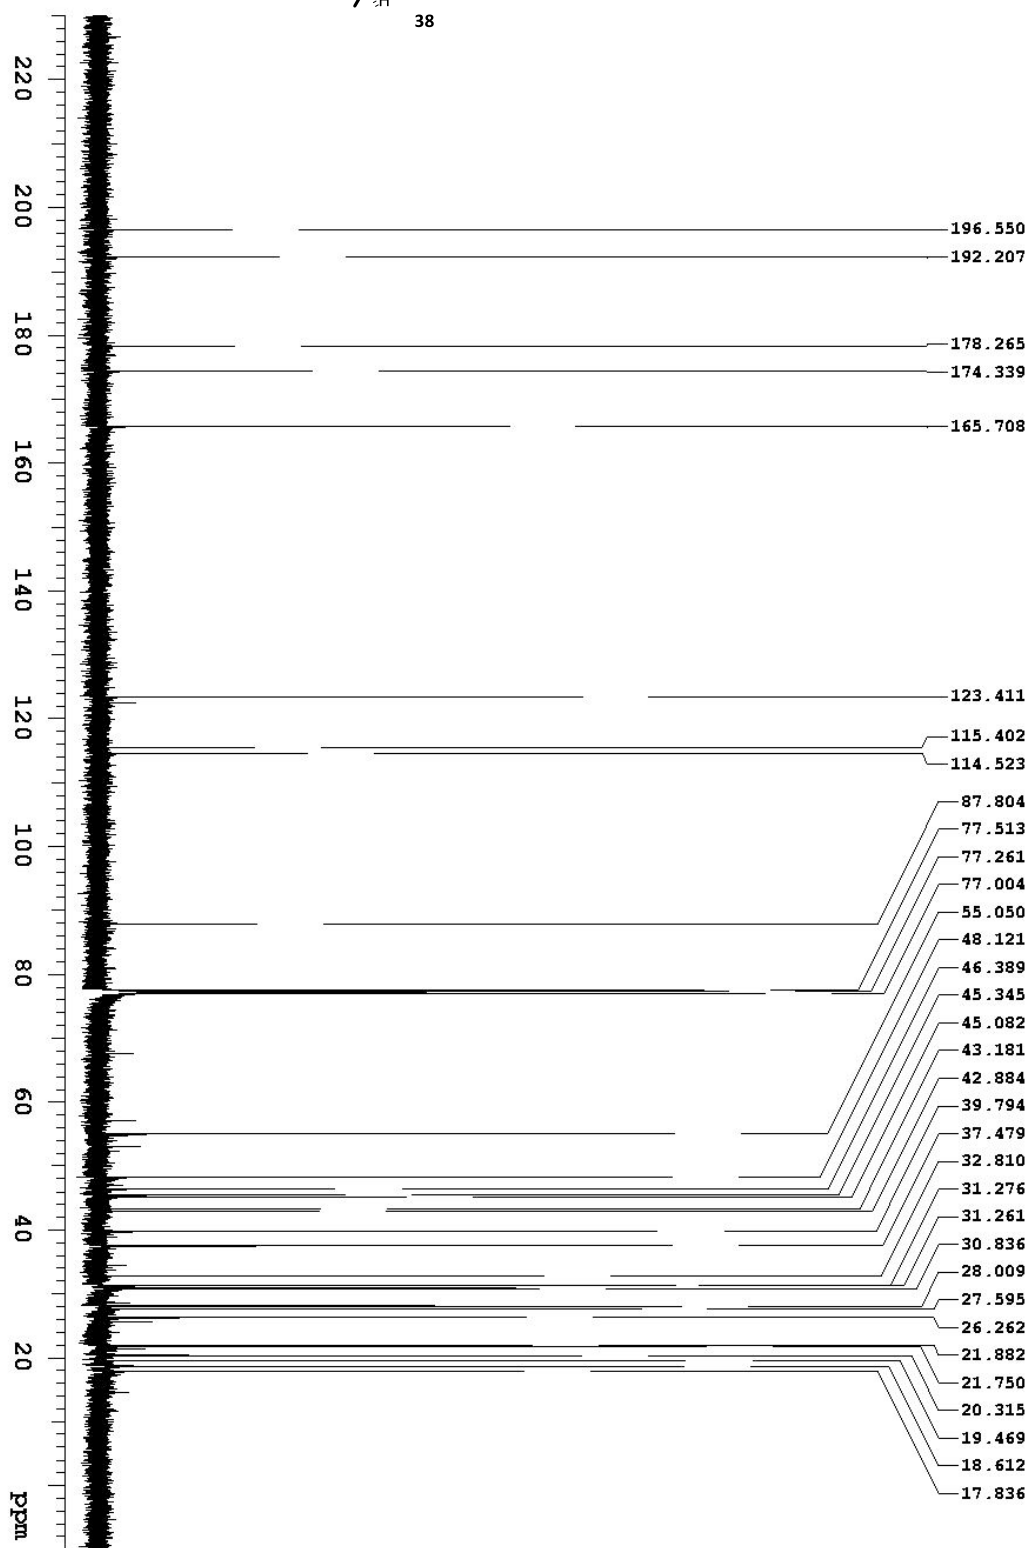



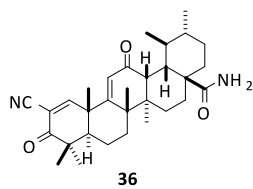

Standard Proton Parameters (500)

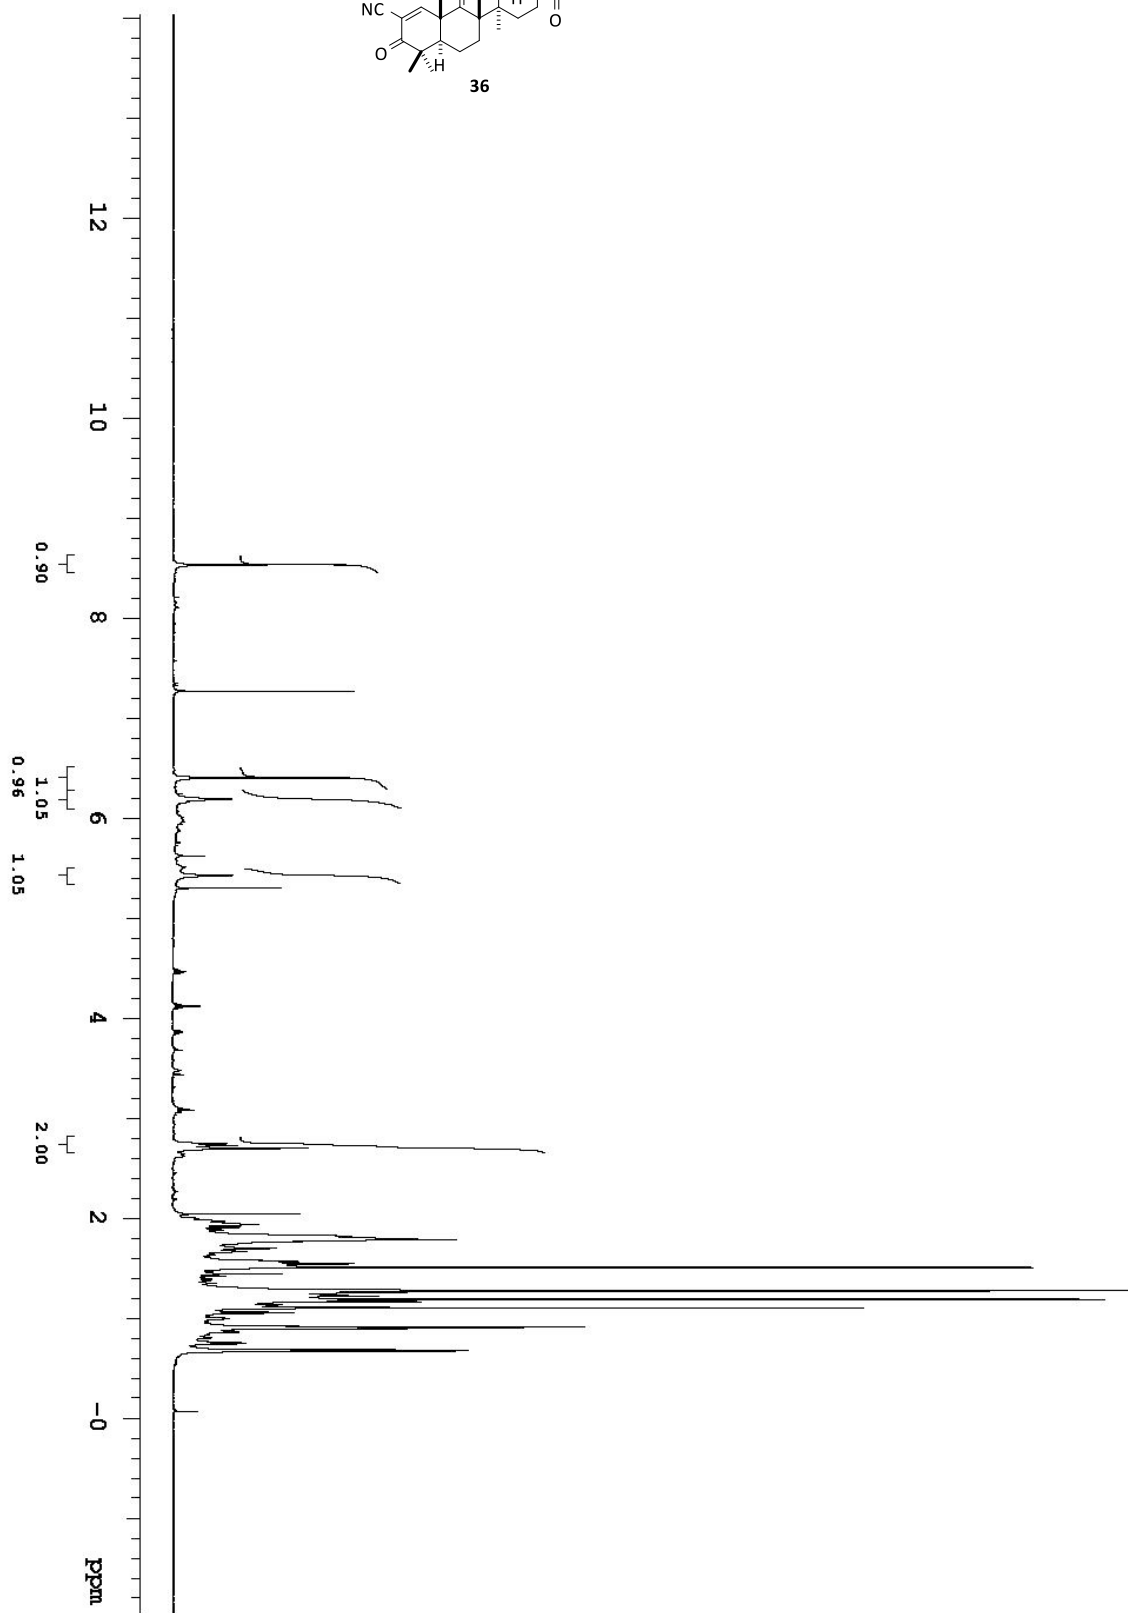



STANDARD CARBON PARAMETERS (500)

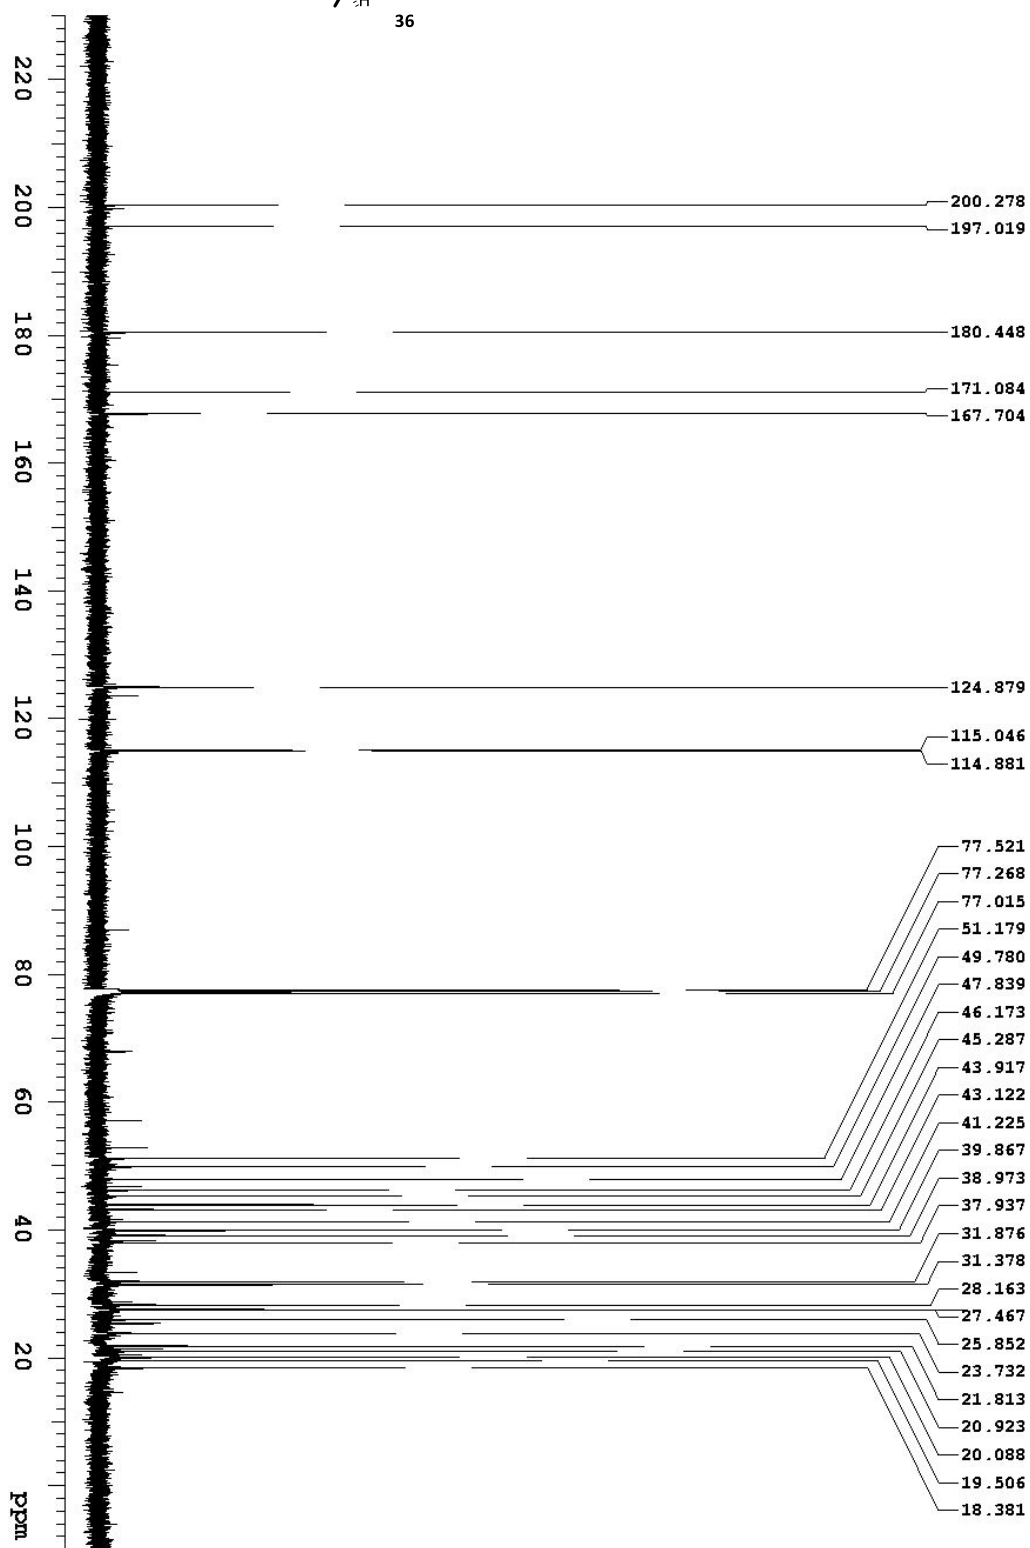

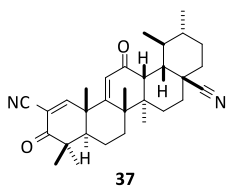

Standard Proton Parameters (500)

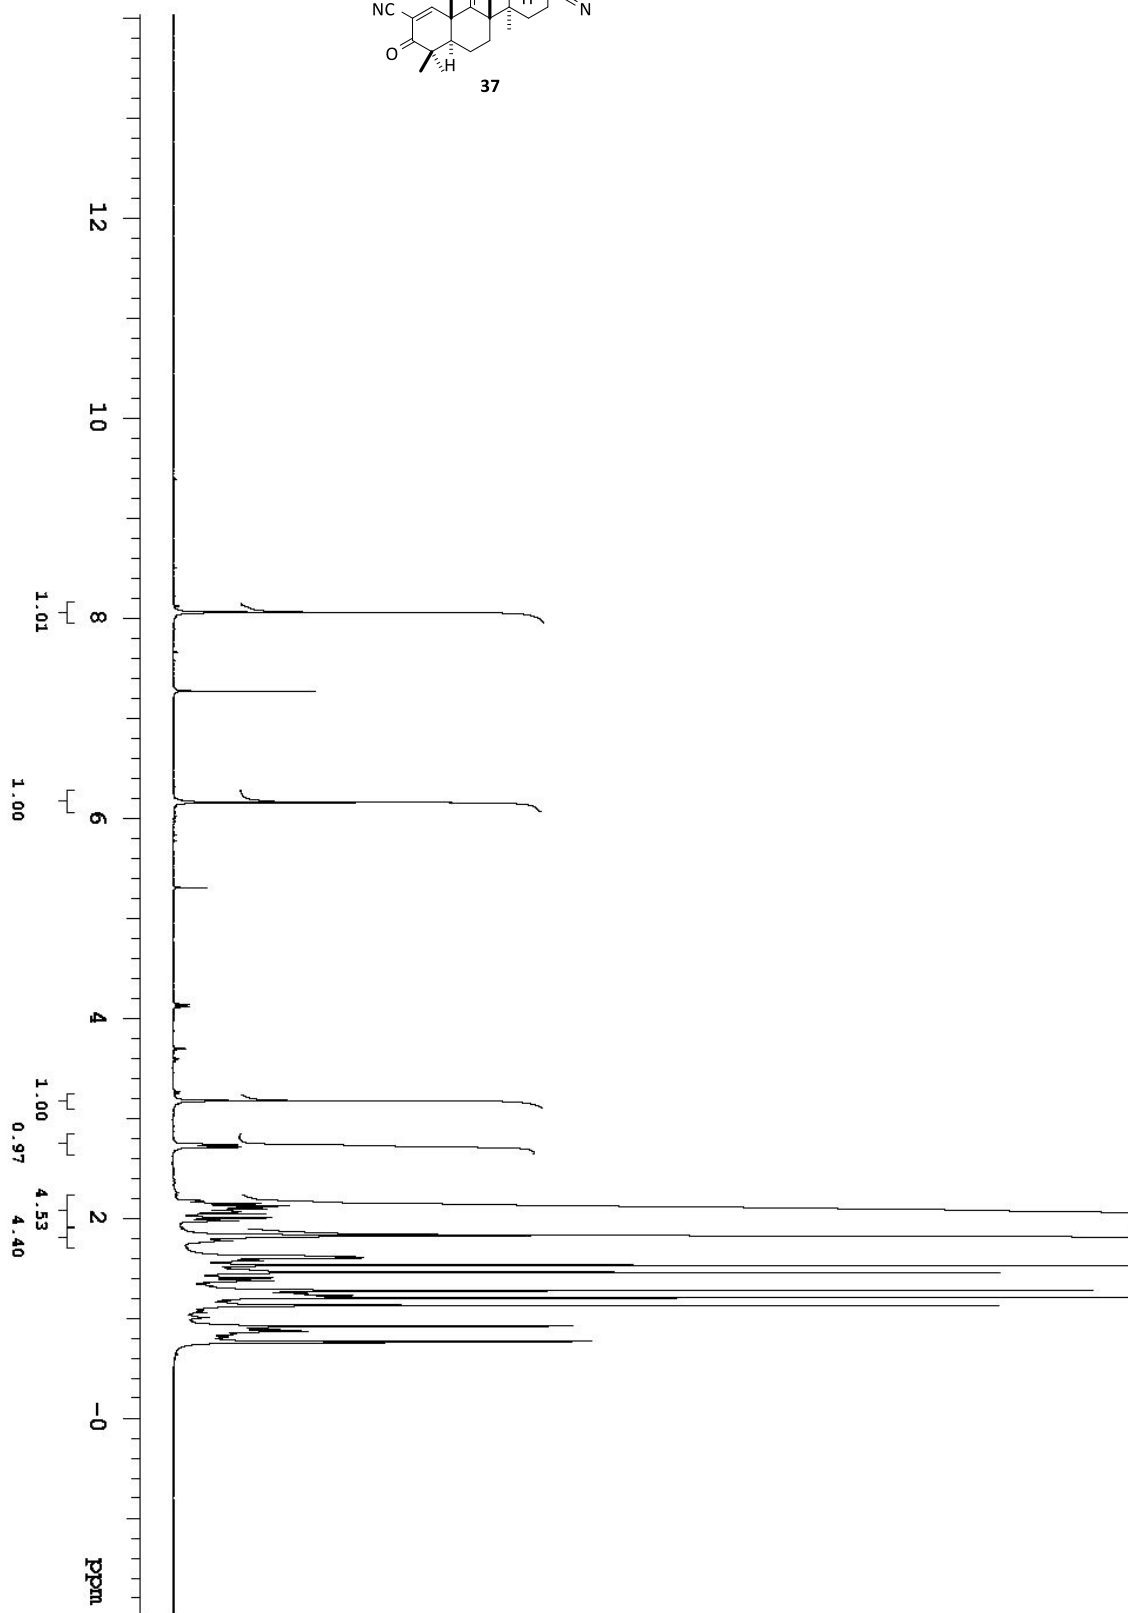

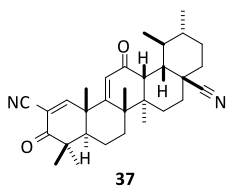

STANDARD CARBON PARAMETERS (500)

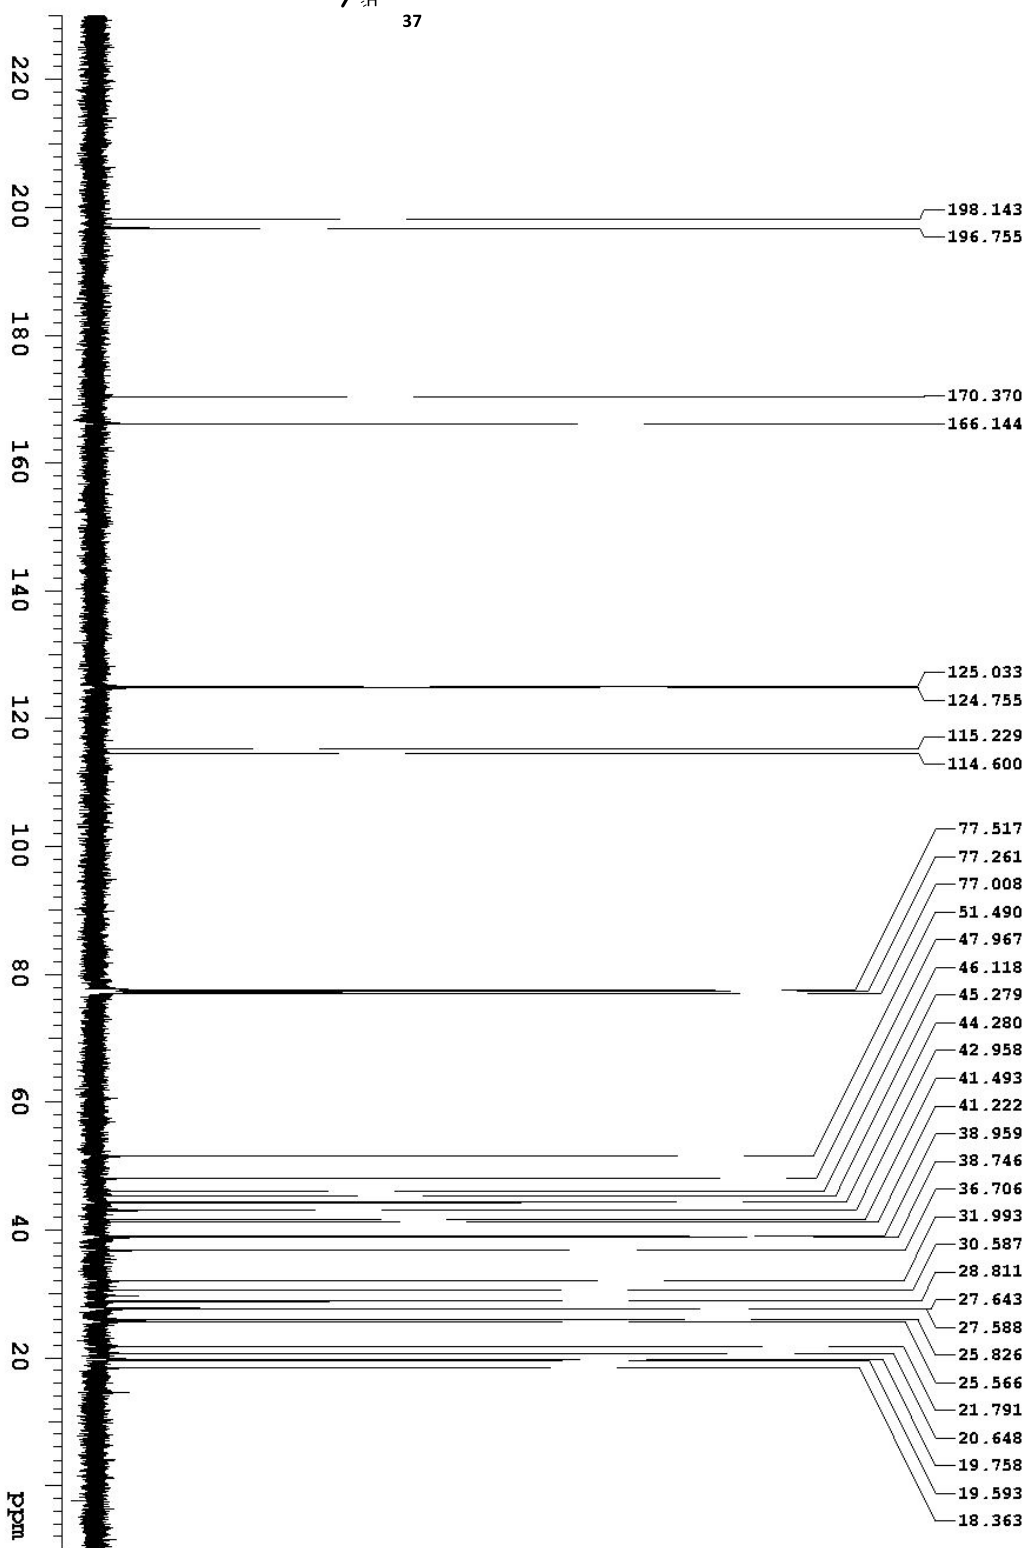

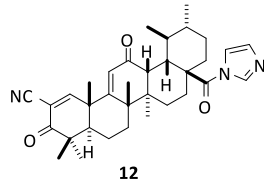

Standard Proton Parameters (500)

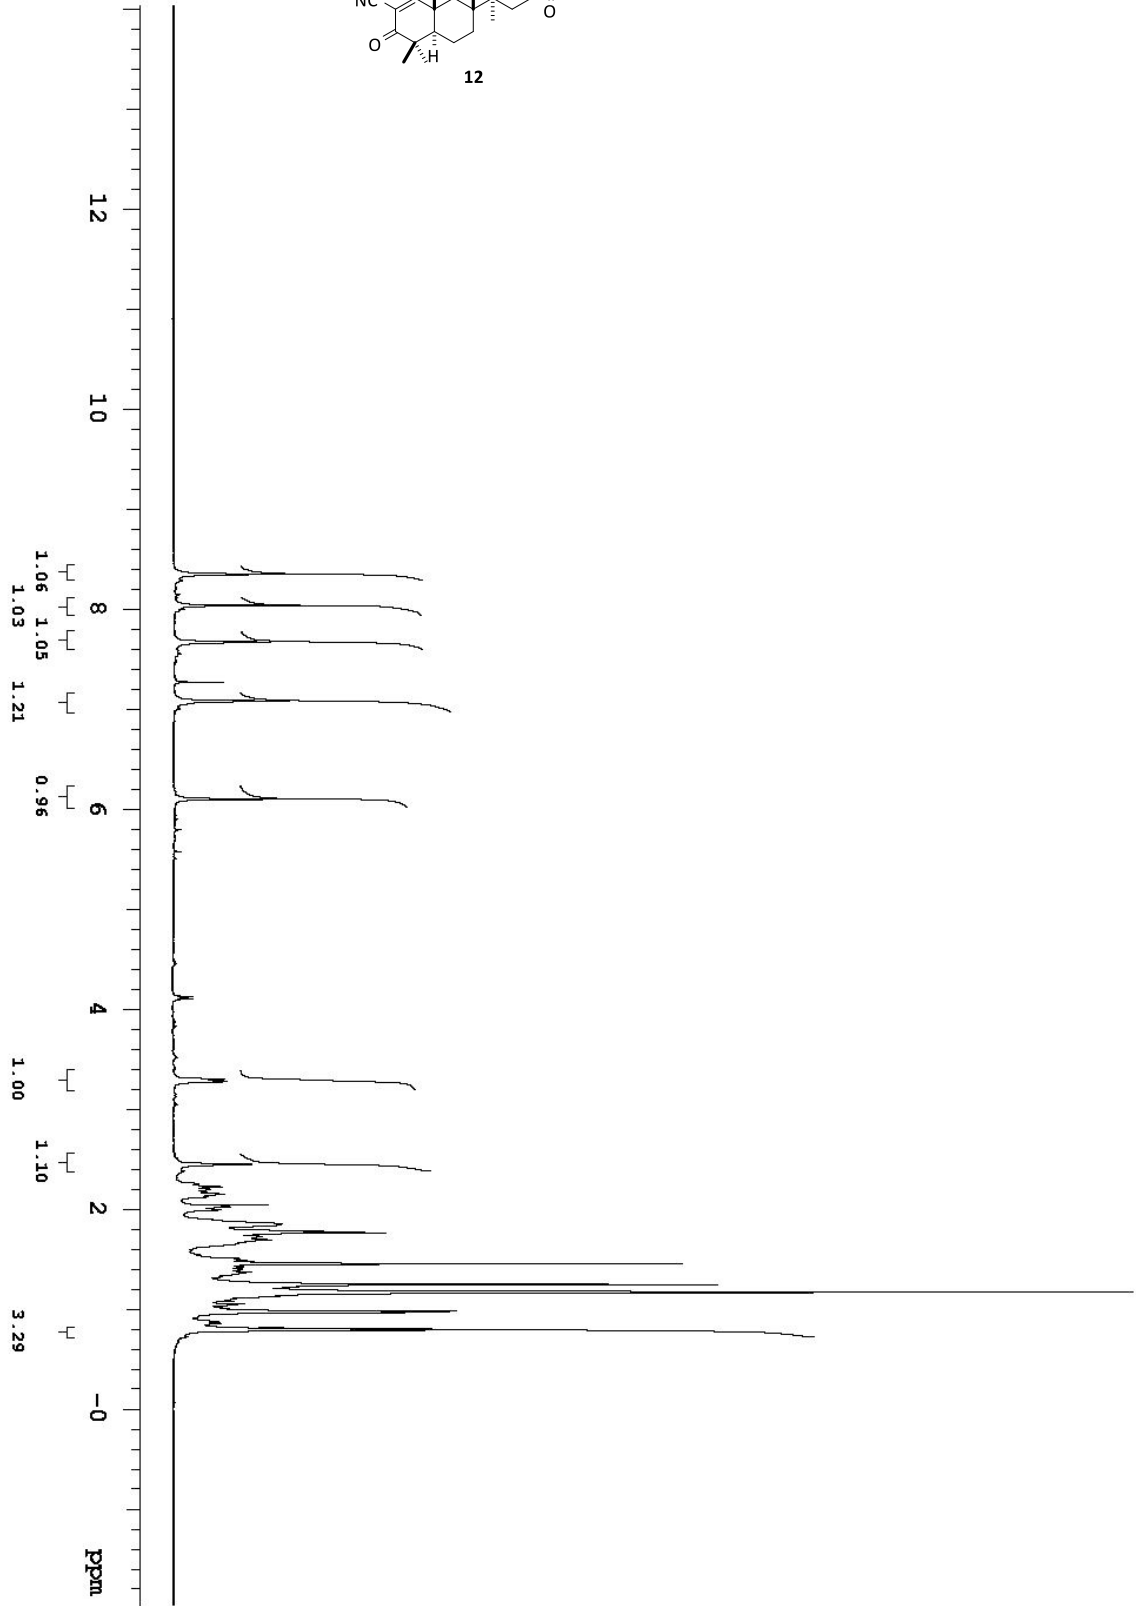

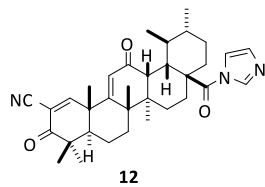

STANDARD CARBON PARAMETERS (500)

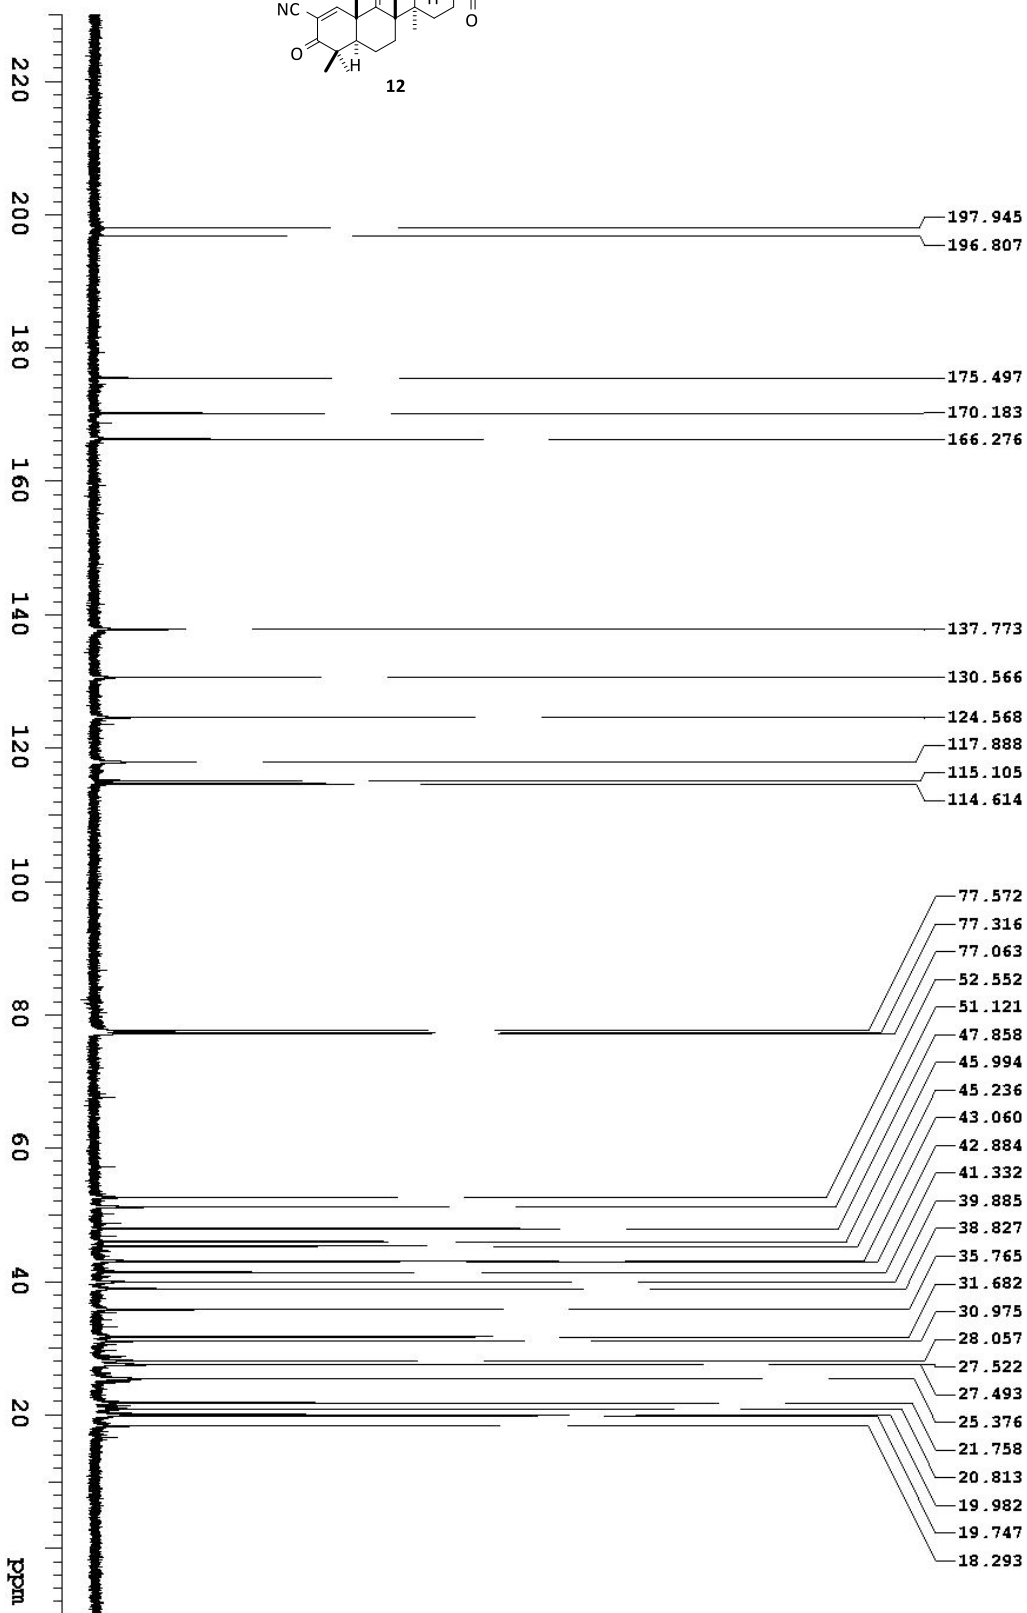

Supplement: c4ob00679h1.pdf [file c4ob00679h1.pdf]
